# Supplementary material for: Polymorphism in a Neotropical toad species: ontogenetic, populational and geographic approaches to chromatic variation in Proceratophrys cristiceps (Müller, 1883) (Amphibia, Anura, Odontophrynidae)
Source: PeerJ. 2022 Mar 25;10:e12879. doi: 10.7717/peerj.12879 (PMC8958967; doi:10.7717/peerj.12879)
Supplement: Supplemental Information 18 — The relative frequencies varied little among the sample categories analysed: ~14:43:6:9:8:20. Significant variations were not observed (α=0.05). [file peerj-10-12879-s018.xlsx]

## Sheet: General
	Specie					Females					Males					Friedman ANOVA
	Phenotype	n	Proportions			Phenotype	n	Proportions			Phenotype	n	Proportions			ANOVA Chi Sqr. (N = 6, df = 2) = 1.3; p = 0.51
	Chrom1	93	0.146688	14.6688		Chrom1	41	0.148551	14.8551		Chrom1	52	0.145251	14.5251
	Chrom2	271	0.427445	42.7445		Chrom2	115	0.416667	41.6667		Chrom2	156	0.435754	43.5754
	Chrom3	39	0.0615142	6.15142		Chrom3	18	0.0652174	6.52174		Chrom3	21	0.0586592	5.86592
	Chrom4	58	0.0914826	9.14826		Chrom4	26	0.0942029	9.42029		Chrom4	32	0.0893855	8.93855
	Chrom5	51	0.0804416	8.04416		Chrom5	20	0.0724638	7.24638		Chrom5	31	0.0865922	8.65922
	Chrom6	122	0.192429	19.2429		Chrom6	56	0.202899	20.2899		Chrom6	66	0.184358	18.4358
	Totals	634	1	100		Totals	276	1	100		Totals	358	1	100
	Adults					Adult Females					Adult Males					Friedman ANOVA
	Phenotype	n	Proportions			Phenotype	n	Proportions			Phenotype	n	Proportions			ANOVA Chi Sqr. (N = 6, df = 2) = 1.0; p = 0.61
	Chrom1	55	0.140665	14.0665		Chrom1	24	0.150943	15.0943		Chrom1	33	0.146018	14.6018
	Chrom2	173	0.442455	44.2455		Chrom2	67	0.421384	42.1384		Chrom2	99	0.438053	43.8053
	Chrom3	32	0.0818414	8.18414		Chrom3	10	0.0628931	6.28931		Chrom3	13	0.0575221	5.75221
	Chrom4	31	0.0792839	7.92839		Chrom4	15	0.0943396	9.43396		Chrom4	20	0.0884956	8.84956
	Chrom5	26	0.0664962	6.64962		Chrom5	11	0.0691824	6.91824		Chrom5	19	0.0840708	8.40708
	Chrom6	74	0.189258	18.9258		Chrom6	32	0.201258	20.1258		Chrom6	42	0.185841	18.5841
	Totals	391	1	100		Totals	159	1	100		Totals	226	1	100
	Subadults					Subadult Females					Subadult Males					Friedman ANOVA
	Phenotype	n	Proportions			Phenotype	n	Proportions			Phenotype	n	Proportions			ANOVA Chi Sqr. (N = 6, df = 2) = 0.33; p = 0.85
	Chrom1	24	0.156863	15.6863		Chrom1	10	0.142857	14.2857		Chrom1	11	0.144737	14.4737
	Chrom2	65	0.424837	42.4837		Chrom2	30	0.428571	42.8571		Chrom2	34	0.447368	44.7368
	Chrom3	6	0.0392157	3.92157		Chrom3	4	0.0571429	5.71429		Chrom3	4	0.0526316	5.26316
	Chrom4	18	0.117647	11.7647		Chrom4	6	0.0857143	8.57143		Chrom4	7	0.0921053	9.21053
	Chrom5	11	0.0718954	7.18954		Chrom5	5	0.0714286	7.14286		Chrom5	6	0.0789474	7.89474
	Chrom6	29	0.189542	18.9542		Chrom6	15	0.214286	21.4286		Chrom6	14	0.184211	18.4211
	Totals	153	1	100		Totals	70	1	100		Totals	76	1	100
	Juveniles					Juveniles Females					Juveniles Males					Friedman ANOVA
	Phenotype	n	Proportions			Phenotype	n	Proportions			Phenotype	n	Proportions			ANOVA Chi Sqr. (N = 6, df = 2) = 0.26; p = 0.87
	Chrom1	14	0.155556	15.5556		Chrom1	5	0.138889	13.8889		Chrom1	7	0.14	14
	Chrom2	33	0.366667	36.6667		Chrom2	16	0.444444	44.4444		Chrom2	22	0.44	44
	Chrom3	1	0.0111111	1.11111		Chrom3	2	0.0555556	5.55556		Chrom3	3	0.06	6
	Chrom4	9	0.1	10		Chrom4	3	0.0833333	8.33333		Chrom4	5	0.1	10
	Chrom5	14	0.155556	15.5556		Chrom5	2	0.0555556	5.55556		Chrom5	4	0.08	8
	Chrom6	19	0.211111	21.1111		Chrom6	8	0.222222	22.2222		Chrom6	9	0.18	18
	Totals	90	1	100		Totals	36	1	100		Totals	50	1	100
	Imature					Imature Females					Imature Males					Friedman ANOVA
	Phenotype	n	Proportions			Phenotype	n	Proportions			Phenotype	n	Proportions			ANOVA Chi Sqr. (N = 6, df = 2) = 1.33; p = 0.51
	Chrom1	34	0.119298	11.9298		Chrom1	15	0.123967	12.3967		Chrom1	19	0.115854	11.5854
	Chrom2	128	0.449123	44.9123		Chrom2	51	0.421488	42.1488		Chrom2	77	0.469512	46.9512
	Chrom3	14	0.0491228	4.91228		Chrom3	5	0.0413223	4.13223		Chrom3	9	0.054878	5.4878
	Chrom4	29	0.101754	10.1754		Chrom4	14	0.115702	11.5702		Chrom4	15	0.0914634	9.14634
	Chrom5	16	0.0561404	5.61404		Chrom5	8	0.0661157	6.61157		Chrom5	8	0.0487805	4.87805
	Chrom6	64	0.224561	22.4561		Chrom6	28	0.231405	23.1405		Chrom6	36	0.219512	21.9512
	Totals	285	1	100		Totals	121	1	100		Totals	164	1	100
	Mature					Mature Females					Mature Males
	Phenotype	n	Proportions			Phenotype	n	Proportions			Phenotype	n	Proportions			Friedman's Statistic = 0.00 (No variance)
	Chrom1	45	0.173745	17.3745		Chrom1	18	0.153846	15.3846		Chrom1	27	0.190141	19.0141
	Chrom2	110	0.42471	42.471		Chrom2	50	0.42735	42.735		Chrom2	60	0.422535	42.2535
	Chrom3	24	0.0926641	9.26641		Chrom3	12	0.102564	10.2564		Chrom3	12	0.084507	8.4507
	Chrom4	19	0.0733591	7.33591		Chrom4	7	0.0598291	5.98291		Chrom4	12	0.084507	8.4507
	Chrom5	20	0.0772201	7.72201		Chrom5	9	0.0769231	7.69231		Chrom5	11	0.0774648	7.74648
	Chrom6	41	0.158301	15.8301		Chrom6	21	0.179487	17.9487		Chrom6	20	0.140845	14.0845
	Totals	259	1	100		Totals	117	1	100		Totals	142	1	100
	Indefinite					Indefinite Females					Indefinite Males					Friedman ANOVA
	Phenotype	n	Proportions			Phenotype	n	Proportions			Phenotype	n	Proportions			ANOVA Chi Sqr. (N = 6, df = 2) = 1.33; p = 0.51
	Chrom1	14	0.155556	15.5556		Chrom1	8	0.210526	21.0526		Chrom1	6	0.115385	11.5385
	Chrom2	33	0.366667	36.6667		Chrom2	14	0.368421	36.8421		Chrom2	19	0.365385	36.5385
	Chrom3	1	0.0111111	1.11111		Chrom3	1	0.0263158	2.63158		Chrom3	0	0	0
	Chrom4	10	0.111111	11.1111		Chrom4	5	0.131579	13.1579		Chrom4	5	0.0961538	9.61538
	Chrom5	15	0.166667	16.6667		Chrom5	3	0.0789474	7.89474		Chrom5	12	0.230769	23.0769
	Chrom6	17	0.188889	18.8889		Chrom6	7	0.184211	18.4211		Chrom6	10	0.192308	19.2308
	Totals	90	1	100		Totals	38	1	100		Totals	52	1	100

## Sheet: Graph
Chromotypes	Specie	Females	Males
Chrom1	14.6688	14.8551	14.5251
Chrom2	42.7445	41.6667	43.5754
Chrom3	6.15142	6.52174	5.86592
Chrom4	9.14826	9.42029	8.93855
Chrom5	8.04416	7.24638	8.65922
Chrom6	19.2429	20.2899	18.4358
Chromotypes	Adults (sp)	Adults (F)	Adults (M)
Chrom1	14.0665	15.0943	14.6018
Chrom2	44.2455	42.1384	43.8053
Chrom3	8.18414	6.28931	5.75221
Chrom4	7.92839	9.43396	8.84956
Chrom5	6.64962	6.91824	8.40708
Chrom6	18.9258	20.1258	18.5841
Chromotypes	Subadults (sp)	Subadults(F)	Subadults (M)
Chrom1	15.6863	14.2857	14.4737
Chrom2	42.4837	42.8571	44.7368
Chrom3	3.92157	5.71429	5.26316
Chrom4	11.7647	8.57143	9.21053
Chrom5	7.18954	7.14286	7.89474
Chrom6	18.9542	21.4286	18.4211
Chromotypes	Juveniles (sp)	Juveniles(F)	Juveniles(M)
Chrom1	15.5556	13.8889	14
Chrom2	36.6667	44.4444	44
Chrom3	1.11111	5.55556	6
Chrom4	10	8.33333	10
Chrom5	15.5556	5.55556	8
Chrom6	21.1111	22.2222	18
Chromotypes	Matures (sp)	Matures(F)	Matures(M)
Chrom1	17.3745	15.3846	19.0141
Chrom2	42.471	42.735	42.2535
Chrom3	9.26641	10.2564	8.4507
Chrom4	7.33591	5.98291	8.4507
Chrom5	7.72201	7.69231	7.74648
Chrom6	15.8301	17.9487	14.0845
Chromotypes	Imatures (sp)	Imatures(F)	Imatures(M)
Chrom1	11.9298	12.3967	11.5854
Chrom2	44.9123	42.1488	46.9512
Chrom3	4.91228	4.13223	5.4878
Chrom4	10.1754	11.5702	9.14634
Chrom5	5.61404	6.61157	4.87805
Chrom6	22.4561	23.1405	21.9512
Chromotypes	Indefinite (sp)	Indefinite(F)	Indefinite(M)
Chrom1	15.5556	21.0526	11.5385
Chrom2	36.6667	36.8421	36.5385
Chrom3	1.11111	2.63158	0
Chrom4	11.1111	13.1579	9.61538
Chrom5	16.6667	7.89474	23.0769
Chrom6	18.8889	18.4211	19.2308
