# Supplementary material for: Polymorphism in a Neotropical toad species: ontogenetic, populational and geographic approaches to chromatic variation in Proceratophrys cristiceps (Müller, 1883) (Amphibia, Anura, Odontophrynidae)
Source: PeerJ. 2022 Mar 25;10:e12879. doi: 10.7717/peerj.12879 (PMC8958967; doi:10.7717/peerj.12879)
Supplement: Supplemental Information 19 [file peerj-10-12879-s019.xlsx]

## Sheet: Data
ID	State	County	Climate	Ecorregion	Forest_type	Pluviometry	Altitude	Tmin	Tmax	CRL	HL	HW	ID	NED	ED	InD	ThL	TL	FoL	FL	IMCL	RND	Class	Sex	Maturity	Lat	Long	Spot_Size	Area	Chromotipes	Demes
FA01	PB	Almas	Aw	Caatinga	SEArA	875	668	19.2	27.8	28.78	10.28	11.82	1.99	1.73	3.53	1.8	10.06	8.7	13.94	5.99	2.51	2.69	Subadult	F	Indeterminate	-7.47083	-36.8808	0.104	9.295	Chrom6	Deme2
FA149	PB	Almas	Aw	Caatinga	SEArA	875	668	19.2	27.8	54.19	19.15	23.48	3.24	4.04	6.25	3.98	22	20.64	29.04	13.06	5.83	3.25	Adult	F	Mature	-7.47083	-36.8808	0.106	7.807	Chrom2	Deme2
FA154	PB	Almas	Aw	Caatinga	SEArA	875	668	19.2	27.8	55.75	20.06	23.55	3.06	4.35	6.19	3.57	23.25	20.51	28.62	13.29	5.26	3.69	Adult	F	Mature	-7.47083	-36.8808	0.964	30.596	Chrom2	Deme2
FA158	PB	Almas	Aw	Caatinga	SEArA	875	668	19.2	27.8	62.92	19.98	24.85	3.14	4.34	6.26	3.61	21.68	22.16	32.86	15.06	5.96	4.02	Adult	F	Mature	-7.47083	-36.8808	0.302	20.059	Chrom2	Deme2
FA159	PB	Almas	Aw	Caatinga	SEArA	875	668	19.2	27.8	50.82	18.46	22.49	3.03	4.25	6.29	3.57	21.6	19.9	28.87	12.21	4.93	4.06	Adult	F	Mature	-7.47083	-36.8808	0.274	24.534	Chrom3	Deme2
FA44	PB	Almas	Aw	Caatinga	SEArA	875	668	19.2	27.8	50.38	17.79	22.63	2.95	3.73	5.97	3.16	20.38	17.76	27.84	12.05	5.11	3.84	Adult	F	Indeterminate	-7.47083	-36.8808	0.857	26.113	Chrom1	Deme2
FA45	PB	Almas	Aw	Caatinga	SEArA	875	668	19.2	27.8	46.08	15.65	18.3	2.27	4.1	6.22	2.63	16.6	14.94	23.58	10	4.07	3.25	Adult	M	Mature	-7.47083	-36.8808	0.25	20.439	Chrom2	Deme2
FA46	PB	Almas	Aw	Caatinga	SEArA	875	668	19.2	27.8	44.9	14.43	17.09	2.75	3.28	5.43	2.52	16.15	14.09	22.19	9.89	3.73	3.38	Adult	M	Mature	-7.47083	-36.8808	0.118	20.343	Chrom2	Deme2
WLSV1308	PB	Almas	Aw	Caatinga	SEArA	875	668	19.2	27.8	47.67	17.88	20.04	2.83	3.07	5.11	2.44	20.34	19.71	27.53	12.7	4.8	3.8	Adult	F	Indeterminate	-7.47083	-36.8808	0.342	14.435	Chrom2	Deme2
WLSV1346	PB	Almas	Aw	Caatinga	SEArA	875	668	19.2	27.8	56.43	20.13	25.55	3.82	4.74	6.97	4.05	22.7	15.85	29.13	12.62	5.36	4.6	Adult	F	Mature	-7.47083	-36.8808	0.26	12.883	Chrom6	Deme2
WLSV1349	PB	Almas	Aw	Caatinga	SEArA	875	668	19.2	27.8	40.22	15.3	19.17	1.98	3.41	4.91	2.48	17.71	16.81	23.56	10.92	4.3	3.41	Adult	M	Indeterminate	-7.47083	-36.8808	0.212	15.518	Chrom6	Deme2
WLSV1463	PB	Almas	Aw	Caatinga	SEArA	875	668	19.2	27.8	45.55	17.79	19.78	3.45	3.65	5.14	3.89	18.59	17.19	24.77	9.74	3.86	3.3	Adult	M	Indeterminate	-7.47083	-36.8808	0.356	17.503	Chrom6	Deme2
WLSV1470	PB	Almas	Aw	Caatinga	SEArA	875	668	19.2	27.8	57.5	19.66	24.26	2.4	3.56	6.15	3.55	20.52	21	29.66	12.85	5.47	4.24	Adult	F	Indeterminate	-7.47083	-36.8808	0.117	28.28	Chrom2	Deme2
WLSV1472	PB	Almas	Aw	Caatinga	SEArA	875	668	19.2	27.8	41.21	16.89	17.86	2.32	2.81	5.88	2.85	16.46	16.85	22.15	10	4.28	3.3	Adult	M	Indeterminate	-7.47083	-36.8808	0.154	18.369	Chrom2	Deme2
WLSV1474	PB	Almas	Aw	Caatinga	SEArA	875	668	19.2	27.8	51.75	20.16	23.24	3.9	4.74	6.29	3.96	21.98	19.51	30.34	13.47	4.45	4.61	Adult	F	Indeterminate	-7.47083	-36.8808	0.199	26.699	Chrom2	Deme2
WLSV1475	PB	Almas	Aw	Caatinga	SEArA	875	668	19.2	27.8	54.13	19.78	24.36	2.59	4.32	6.88	3.63	20.88	19.86	29.17	13.1	5.11	4.47	Adult	F	Indeterminate	-7.47083	-36.8808	0.505	20.937	Chrom3	Deme2
WLSV1476	PB	Almas	Aw	Caatinga	SEArA	875	668	19.2	27.8	45.94	17.25	19.72	2.44	2.87	5.14	2.83	16.59	16.18	22.24	10.2	4.3	3.2	Adult	F	Mature	-7.47083	-36.8808	0.086	17.757	Chrom5	Deme2
WLSV1477	PB	Almas	Aw	Caatinga	SEArA	875	668	19.2	27.8	42.19	18.1	19.87	2.53	4.11	5.59	4.03	15.08	14.63	23.22	11.43	4.09	3.29	Adult	M	Indeterminate	-7.47083	-36.8808	0.198	20.912	Chrom2	Deme2
WLSV1485	PB	Almas	Aw	Caatinga	SEArA	875	668	19.2	27.8	40.45	15.77	17.89	2.36	2.95	5.78	3.17	16.28	16.74	23.31	10.17	4.64	2.98	Adult	M	Mature	-7.47083	-36.8808	0.033	17.223	Chrom5	Deme2
WLSV1487	PB	Almas	Aw	Caatinga	SEArA	875	668	19.2	27.8	41.19	16.8	20.76	2.52	3.71	6.16	3.59	18.45	18.55	26.16	10.83	4.61	3.6	Adult	M	Indeterminate	-7.47083	-36.8808	0.043	14.685	Chrom1	Deme2
WLSV1488	PB	Almas	Aw	Caatinga	SEArA	875	668	19.2	27.8	42.88	17.22	19.56	2.77	3.84	5.57	4.2	18	18.04	24.68	11.29	4.22	3.25	Adult	M	Indeterminate	-7.47083	-36.8808	0.138	24.047	Chrom1	Deme2
WLSV1497	PB	Almas	Aw	Caatinga	SEArA	875	668	19.2	27.8	38	15.98	17.85	2.54	2.93	5.52	2.91	15.13	15.94	22.72	9.49	4.38	2.91	Adult	M	Indeterminate	-7.47083	-36.8808	0.123	23.592	Chrom1	Deme2
WLSV1505	PB	Almas	Aw	Caatinga	SEArA	875	668	19.2	27.8	51.01	18.65	19.83	3.31	3.9	6.81	3.4	19.68	18.39	25.96	11.01	4.55	3.42	Adult	F	Indeterminate	-7.47083	-36.8808	0.081	24.615	Chrom6	Deme2
WLSV1566	PB	Almas	Aw	Caatinga	SEArA	875	668	19.2	27.8	39.53	14.95	16.79	3.55	3.91	3.23	3.65	15.25	13.94	20.72	8.31	3.69	3.55	Adult	F	Indeterminate	-7.47083	-36.8808	0.123	15.136	Chrom2	Deme2
WLSV1567	PB	Almas	Aw	Caatinga	SEArA	875	668	19.2	27.8	56.6	19.45	22.04	2.66	3.83	4.9	2.57	22.29	20.99	29.03	11.44	4.9	4.32	Adult	F	Mature	-7.47083	-36.8808	0.039	16.135	Chrom1	Deme2
WLSV1572	PB	Almas	Aw	Caatinga	SEArA	875	668	19.2	27.8	52.21	18.52	21.66	2.69	3.63	5.75	2.8	19.19	18.28	25.3	10.49	4.53	4.09	Adult	F	Mature	-7.47083	-36.8808	0.065	20.894	Chrom2	Deme2
WLSV2021	PB	Almas	Aw	Caatinga	SEArA	875	668	19.2	27.8	56.57	20.24	23.74	2.8	4.55	5.01	2.85	20.14	19.95	30.49	12.79	4.55	4.22	Adult	F	Mature	-7.47083	-36.8808	0.139	10.656	Chrom1	Deme2
WLSV2026	PB	Almas	Aw	Caatinga	SEArA	875	668	19.2	27.8	55.33	18.74	23.11	2.99	3.86	6.22	3.17	18.63	19.48	27.78	12.3	4.49	3.98	Adult	F	Indeterminate	-7.47083	-36.8808	0.053	17.652	Chrom2	Deme2
WLSV2042	PB	Almas	Aw	Caatinga	SEArA	875	668	19.2	27.8	57.99	21.28	25.31	3.92	4.91	6.54	4.04	21.66	20.75	32.18	13.19	5.19	4.12	Adult	F	Mature	-7.47083	-36.8808	0.235	19.008	Chrom1	Deme2
WLSV2131	PB	Almas	Aw	Caatinga	SEArA	875	668	19.2	27.8	52.86	19.87	24.56	3.55	4.77	5.66	3.32	21.08	20.05	28.21	12.79	5.52	3.89	Adult	F	Indeterminate	-7.47083	-36.8808	0.034	18.182	Chrom2	Deme2
WLSV2170	PB	Almas	Aw	Caatinga	SEArA	875	668	19.2	27.8	47.77	18.38	22.04	2.66	3.44	5.11	3.09	18.05	18.35	26.61	11.46	4.88	3.61	Adult	F	Mature	-7.47083	-36.8808	0.099	20.378	Chrom6	Deme2
WLSV2252	PB	Almas	Aw	Caatinga	SEArA	875	668	19.2	27.8	27.51	9.72	11.72	1.57	1.68	3.65	1.76	9.44	7.66	12.13	4.73	2.19	2.11	Subadult	F	Indeterminate	-7.47083	-36.8808	0.048	8.6	Chrom2	Deme2
WLSV2259	PB	Almas	Aw	Caatinga	SEArA	875	668	19.2	27.8	49.56	17.41	19.56	2.72	3.48	6.33	2.87	18.03	17.63	25.38	11.56	4.27	3.27	Adult	M	Mature	-7.47083	-36.8808	0.022	16.824	Chrom6	Deme2
WLSV2260	PB	Almas	Aw	Caatinga	SEArA	875	668	19.2	27.8	48.81	16.24	18.87	2.6	3.42	5.01	2.44	17.86	17.7	23.93	11.28	4.27	3.47	Adult	M	Mature	-7.47083	-36.8808	0.037	18.55	Chrom5	Deme2
WLSV2339	PB	Almas	Aw	Caatinga	SEArA	875	668	19.2	27.8	30.01	11.92	11.39	1.57	2.38	3.78	2.47	11.38	10.98	15.82	6.84	2.95	2.55	Subadult	M	Mature	-7.47083	-36.8808	0.037	17.533	Chrom4	Deme2
WLSV2340	PB	Almas	Aw	Caatinga	SEArA	875	668	19.2	27.8	29.14	10.89	12.32	1.2	1.62	4.04	1.82	10.74	9.2	15.77	6.58	3.01	2.85	Subadult	M	Indeterminate	-7.47083	-36.8808	0.052	13.935	Chrom6	Deme2
WLSV2341	PB	Almas	Aw	Caatinga	SEArA	875	668	19.2	27.8	26.54	9.84	11.13	1.43	1.55	3.31	1.77	10.44	8.33	13.42	5.52	2.45	2.32	Subadult	M	Indeterminate	-7.47083	-36.8808	0.075	20.316	Chrom2	Deme2
WLSV2388	PB	Almas	Aw	Caatinga	SEArA	875	668	19.2	27.8	23.03	9.27	9.21	1.43	2.25	3	2.34	9.06	8.33	11.32	4.89	2.09	2.11	Juvenile	M	Immature	-7.47083	-36.8808	0.052	19.668	Chrom1	Deme2
WLSV2391	PB	Almas	Aw	Caatinga	SEArA	875	668	19.2	27.8	33.16	12.06	14.09	1.89	2.87	4.47	2.92	12.35	12.49	16.11	8.38	3.16	2.84	Subadult	F	Indeterminate	-7.47083	-36.8808	0.144	21.598	Chrom2	Deme2
WLSV2935	PB	Almas	Aw	Caatinga	SEArA	875	668	19.2	27.8	53.96	19.89	23	3.47	4.36	5.94	2.5	21.7	19.76	31.07	12.55	5.42	4.37	Adult	F	Indeterminate	-7.47083	-36.8808	0.302	22.399	Chrom2	Deme2
WLSV3007	PB	Almas	Aw	Caatinga	SEArA	875	668	19.2	27.8	59.83	21.34	23.39	4.36	6.06	6.61	4.85	21.7	20.62	31.6	11.54	5.59	4.85	Adult	F	Mature	-7.47083	-36.8808	0.43	18.283	Chrom4	Deme2
WLSV3016	PB	Almas	Aw	Caatinga	SEArA	875	668	19.2	27.8	33.3	11.57	13.41	2.15	2.68	4.18	2.17	11.97	10.99	17.09	7.44	2.83	2.17	Subadult	F	Indeterminate	-7.47083	-36.8808	0.101	10.081	Chrom5	Deme2
WLSV3017A	PB	Almas	Aw	Caatinga	SEArA	875	668	19.2	27.8	31.08	11.14	11.82	1.77	1.93	3.84	1.95	12.24	11	16.74	6.35	2.65	2.47	Subadult	F	Indeterminate	-7.47083	-36.8808	0.052	16.386	Chrom3	Deme2
WLSV3018	PB	Almas	Aw	Caatinga	SEArA	875	668	19.2	27.8	33.38	12.53	17.2	2.68	3.77	3.96	2.66	14.09	11.57	17.37	8.22	3.11	3.38	Subadult	M	Indeterminate	-7.47083	-36.8808	0.083	19.963	Chrom3	Deme2
WLSV3019	PB	Almas	Aw	Caatinga	SEArA	875	668	19.2	27.8	31.38	13.65	14.97	3.15	2.56	3.71	3.22	12.74	11.95	17.1	8.42	3.04	2.44	Subadult	M	Mature	-7.47083	-36.8808	0.074	16.909	Chrom1	Deme2
WLSV3031	PB	Almas	Aw	Caatinga	SEArA	875	668	19.2	27.8	60.82	22.66	25.61	3.9	4.97	6.53	3.1	22.14	21.88	31.3	12.68	5.61	4.44	Adult	F	Indeterminate	-7.47083	-36.8808	0.035	17.299	Chrom1	Deme2
WLSV3032	PB	Almas	Aw	Caatinga	SEArA	875	668	19.2	27.8	43.29	12.46	18.59	4.05	2.91	5.12	2.21	16.87	16.48	18.57	8.79	4.65	3.59	Adult	M	Mature	-7.47083	-36.8808	0.035	17.998	Chrom5	Deme2
WLSV3303	PB	Almas	Aw	Caatinga	SEArA	875	668	19.2	27.8	38.81	14.47	16.57	2.56	3.09	5.11	2.22	15.09	13.7	20.28	9.84	3.6	3.17	Adult	M	Mature	-7.47083	-36.8808	0.088	21.792	Chrom4	Deme2
WLSV3304	PB	Almas	Aw	Caatinga	SEArA	875	668	19.2	27.8	50.57	17.42	19.13	3.11	4.13	5.66	2.79	18.79	17.25	26.2	11.74	4.7	3.94	Adult	F	Indeterminate	-7.47083	-36.8808	0.036	17.991	Chrom2	Deme2
WLSV3305	PB	Almas	Aw	Caatinga	SEArA	875	668	19.2	27.8	48.48	17.31	20.59	2.78	3.81	5.32	2.62	18.47	17.24	26.13	11.01	4.48	3.65	Adult	F	Mature	-7.47083	-36.8808	0.075	19.495	Chrom2	Deme2
WLSV3318	PB	Almas	Aw	Caatinga	SEArA	875	668	19.2	27.8	38.27	13.53	15.39	2.07	3.5	4.98	2.33	13.92	13.07	20.42	8.76	3.26	2.91	Adult	M	Mature	-7.47083	-36.8808	0.095	12.448	Chrom2	Deme2
WLSV3319	PB	Almas	Aw	Caatinga	SEArA	875	668	19.2	27.8	40.68	15.26	16.56	2.48	3.1	4.82	2.68	14.07	13.42	20.46	9.61	3.42	3.02	Adult	M	Mature	-7.47083	-36.8808	0.062	18.575	Chrom1	Deme2
WLSV3320	PB	Almas	Aw	Caatinga	SEArA	875	668	19.2	27.8	39.73	13.8	15.65	2	3.28	4.41	2.15	15.81	13.69	21.36	8.98	3.6	2.98	Adult	M	Mature	-7.47083	-36.8808	0.027	14.305	Chrom1	Deme2
WLSV3321	PB	Almas	Aw	Caatinga	SEArA	875	668	19.2	27.8	48.25	17.15	19.1	2.77	3.81	5.56	2.45	17.75	16.14	23.97	10.47	4.42	3.1	Adult	F	Indeterminate	-7.47083	-36.8808	0.045	12.643	Chrom6	Deme2
WLSV3990	PB	Almas	Aw	Caatinga	SEArA	875	668	19.2	27.8	38.68	14.73	17.09	2.92	3.33	5.25	2.5	15.82	14.84	23.02	9.47	4.37	3.06	Adult	F	Indeterminate	-7.47083	-36.8808	0.045	15.522	Chrom4	Deme2
WLSV4057	PB	Almas	Aw	Caatinga	SEArA	875	668	19.2	27.8	36.9	14.18	15.76	2.49	3.13	6.02	2.58	15.29	14.51	21.07	9.12	3.9	2.88	Adult	M	Indeterminate	-7.47083	-36.8808	0.096	25.035	Chrom2	Deme2
WLSV4063	PB	Almas	Aw	Caatinga	SEArA	875	668	19.2	27.8	43.85	17.64	19.41	2.47	4.43	6.66	2.8	17.31	17.51	26.18	11.1	4.86	3.67	Adult	F	Indeterminate	-7.47083	-36.8808	0.036	15.863	Chrom4	Deme2
WLSV4091	PB	Almas	Aw	Caatinga	SEArA	875	668	19.2	27.8	44.48	17.46	20.1	3.25	3.53	5.14	2.91	17.32	17.14	25.52	10.72	4.31	3.8	Adult	F	Mature	-7.47083	-36.8808	0.058	20.234	Chrom6	Deme2
WLSV4093	PB	Almas	Aw	Caatinga	SEArA	875	668	19.2	27.8	42.33	15.48	18.05	2.2	3.58	5.74	2.71	16.82	15.66	22.35	9.85	4.16	2.97	Adult	F	Indeterminate	-7.47083	-36.8808	0.081	23.052	Chrom1	Deme2
WLSV4095	PB	Almas	Aw	Caatinga	SEArA	875	668	19.2	27.8	40.47	14.56	15.87	2.33	3.26	4.86	2.25	15.62	15.23	23.13	9.59	3.99	2.89	Adult	M	Mature	-7.47083	-36.8808	0.07	19.528	Chrom1	Deme2
Y039	PB	Almas	Aw	Caatinga	SEArA	875	668	19.2	27.8	28.3	9.94	11.55	2	2.8	3.45	1.98	10.28	10.8	16.7	5.60333	2.45	3	Subadult		Indeterminate	-7.47083	-36.8808	0.058	18.5627	Chrom2	Deme2
WLSV4207	PB	Almas	Aw	Caatinga	SEArA	875	668	19.2	27.8	52.37	19.84	25.65	5.1	5.95	4.86	4.96	22.52	20.1	28.92	13.58	5.13	4.48	Adult	F	Mature	-7.47083	-36.8808	0.09	26.544	Chrom2	Deme2
WLSV4208	PB	Almas	Aw	Caatinga	SEArA	875	668	19.2	27.8	41.11	14.75	17.3	2.31	2.9	4.95	2.31	16.81	15.72	24.22	10.42	4.29	3.66	Adult	M	Indeterminate	-7.47083	-36.8808	0.052	17.075	Chrom2	Deme2
WLSV4209	PB	Almas	Aw	Caatinga	SEArA	875	668	19.2	27.8	31.72	14.47	16.79	3.07	2.37	4.16	3.58	14.78	15.83	21.77	8.2	3.75	3.37	Subadult	M	Indeterminate	-7.47083	-36.8808	0.034	12.305	Chrom2	Deme2
WLSV4237	PB	Almas	Aw	Caatinga	SEArA	875	668	19.2	27.8	30.09	11.56	12.85	1.66	2.67	4.19	1.94	13.05	11.08	16.82	7.56	2.99	2.48	Subadult	F	Indeterminate	-7.47083	-36.8808	0.03	15.832	Chrom2	Deme2
WLSV4335	PB	Almas	Aw	Caatinga	SEArA	875	668	19.2	27.8	34.76	13.33	15.53	1.69	2.91	4.45	2.11	12.76	11.42	19.2	8.4	3.87	2.57	Subadult	M	Indeterminate	-7.47083	-36.8808	0.104	20.592	Chrom1	Deme2
WLSV4365	PB	Almas	Aw	Caatinga	SEArA	875	668	19.2	27.8	29.27	10.71	12.03	1.63	1.97	4.1	1.83	11.34	10.25	16.37	6.4	2.81	2.21	Subadult	F	Indeterminate	-7.47083	-36.8808	0.047	15.704	Chrom6	Deme2
WLSV4375	PB	Almas	Aw	Caatinga	SEArA	875	668	19.2	27.8	29.98	11.48	12.51	2.06	2.5	4.13	2.01	11.49	10.6	16.71	6.24	3.33	2.35	Subadult	M	Indeterminate	-7.47083	-36.8808	0.063996	17.7979	Chrom1	Deme2
WLSV4388	PB	Almas	Aw	Caatinga	SEArA	875	668	19.2	27.8	41.44	14.62	16.66	2.28	3.01	5.96	2.67	17.74	15.75	21.63	9.89	4.03	3.01	Adult	M	Indeterminate	-7.47083	-36.8808	0.101	23.905	Chrom2	Deme2
WLSV4397	PB	Almas	Aw	Caatinga	SEArA	875	668	19.2	27.8	34.11	12.41	13.91	2.18	2.79	4.55	2.1	13.57	11.51	18.63	7.66	3.22	2.84	Subadult	M	Indeterminate	-7.47083	-36.8808	0.083	18.02	Chrom4	Deme2
WLSV4398	PB	Almas	Aw	Caatinga	SEArA	875	668	19.2	27.8	35.15	12.16	14.49	2.09	2.24	4.27	1.55	14.37	13.26	20.07	8.42	3.16	2.57	Adult	M	Indeterminate	-7.47083	-36.8808	0.095	19.087	Chrom3	Deme2
WLSV4399	PB	Almas	Aw	Caatinga	SEArA	875	668	19.2	27.8	38.1	13.2	15.3	1.94	3.07	4.2	1.97	15.15	12.9	20	7.92	3.32	2.92	Adult	M	Indeterminate	-7.47083	-36.8808	0.1	16.723	Chrom6	Deme2
WLSV4411	PB	Almas	Aw	Caatinga	SEArA	875	668	19.2	27.8	40.23	14.2	16.96	1.98	3.2	4.99	2.64	15.46	13.38	20.43	8.28	3.6	3.15	Adult	F	Indeterminate	-7.47083	-36.8808	0.072	15.53	Chrom2	Deme2
WLSV4492	PB	Almas	Aw	Caatinga	SEArA	875	668	19.2	27.8	50.22	19.4	23.59	3.96	4.18	5.17	3.84	23.38	20.73	33	15.13	6.09	5.1	Adult	F	Mature	-7.47083	-36.8808	0.059	10.245	Chrom3	Deme2
WLSV4493	PB	Almas	Aw	Caatinga	SEArA	875	668	19.2	27.8	34.75	13.08	11.93	2	2.66	3.9	3.15	14.04	12.15	17.09	9.2	3.58	3.03	Subadult	M	Mature	-7.47083	-36.8808	0.059	10.245	Chrom6	Deme2
WLSV4494	PB	Almas	Aw	Caatinga	SEArA	875	668	19.2	27.8	29.27	10.71	12.31	2.15	2.93	3.77	2.7	12.56	10.49	15.97	6.8	3.39	2.67	Subadult	F	Indeterminate	-7.47083	-36.8808	0.044	17.976	Chrom2	Deme2
WLSV4515	PB	Almas	Aw	Caatinga	SEArA	875	668	19.2	27.8	37.1	14.88	17.1	2.43	3.35	4.75	3.27	16.67	14.36	21.08	9.83	3.68	3.03	Adult	M	Mature	-7.47083	-36.8808	0.055	21.77	Chrom2	Deme2
WLSV4529	PB	Almas	Aw	Caatinga	SEArA	875	668	19.2	27.8	41.71	15.43	19.05	2.78	3.45	4.48	3.29	16.25	14.55	21.36	10.57	4.22	3.23	Adult	M	Indeterminate	-7.47083	-36.8808	0.118	16.692	Chrom2	Deme2
WLSV4530	PB	Almas	Aw	Caatinga	SEArA	875	668	19.2	27.8	44.54	16.1	19.29	3.02	3.27	5.1	3.47	16.53	15.14	21.88	11.51	4.3	3.11	Adult	M	Mature	-7.47083	-36.8808	0.032	8.91	Chrom5	Deme2
WLSV4533	PB	Almas	Aw	Caatinga	SEArA	875	668	19.2	27.8	49.92	15.94	20.19	4.09	3.53	4.78	3.42	19.03	16.84	22.99	10.55	4.26	3.78	Adult	M	Mature	-7.47083	-36.8808	0.147	23.791	Chrom2	Deme2
WLSV4604	PB	Almas	Aw	Caatinga	SEArA	875	668	19.2	27.8	55.75	19.5	23.65	4.27	3.93	4.98	3.89	23.16	19.85	27.8	12.45	5.52	4.03	Adult	F	Mature	-7.47083	-36.8808	0.106	13.811	Chrom2	Deme2
WLSV4646	PB	Almas	Aw	Caatinga	SEArA	875	668	19.2	27.8	45.66	17.63	18.8	2.89	4.26	6.01	2.82	18.82	17.29	26.74	11.11	4.7	3.17	Adult	M	Indeterminate	-7.47083	-36.8808	0.085	21.291	Chrom2	Deme2
WLSV4647	PB	Almas	Aw	Caatinga	SEArA	875	668	19.2	27.8	46.97	16.24	19.5	2.7	3.68	6.17	2.74	15.76	16.69	26.19	10.72	4.76	3.43	Adult	M	Indeterminate	-7.47083	-36.8808	0.05	14.662	Chrom2	Deme2
WLSV4765	PB	Almas	Aw	Caatinga	SEArA	875	668	19.2	27.8	34.69	12.75	14.21	1.97	2.7	4.63	2.63	12.5	12.6	17.98	7.4	3.3	2.7	Subadult	F	Indeterminate	-7.47083	-36.8808	0.08	19.335	Chrom1	Deme2
WLSV4766	PB	Almas	Aw	Caatinga	SEArA	875	668	19.2	27.8	30.64	12.69	13.4	2.41	2.71	4.06	2.57	13.17	12.68	17.78	7.41	2.98	2.55	Subadult	M	Indeterminate	-7.47083	-36.8808	0.038	17.73	Chrom2	Deme2
WLSV4767	PB	Almas	Aw	Caatinga	SEArA	875	668	19.2	27.8	35.28	13.59	15.1	2.57	3.3	4.8	2.69	14.42	13.82	19.35	8.04	3.7	2.87	Adult	F	Indeterminate	-7.47083	-36.8808	0.133	17.221	Chrom1	Deme2
WLSV4768	PB	Almas	Aw	Caatinga	SEArA	875	668	19.2	27.8	29.66	11.9	13.97	1.9	2.61	4.28	2.66	11.79	10.7	16.89	7.13	3.36	2.6	Subadult	M	Indeterminate	-7.47083	-36.8808	0.053	23.035	Chrom2	Deme2
WLSV4769	PB	Almas	Aw	Caatinga	SEArA	875	668	19.2	27.8	30.64	11.5	11.96	1.53	2.21	3.89	2.52	12.38	12.81	15.97	7.71	2.97	2.37	Subadult	M	Indeterminate	-7.47083	-36.8808	0.096	16.989	Chrom4	Deme2
WLSV4770	PB	Almas	Aw	Caatinga	SEArA	875	668	19.2	27.8	23.99	10.27	12.03	1.63	2.39	3.54	1.97	10.15	10.32	13.99	6.53	2.54	2.15	Juvenile	F	Immature	-7.47083	-36.8808	0.049	17.47	Chrom2	Deme2
WLSV4771	PB	Almas	Aw	Caatinga	SEArA	875	668	19.2	27.8	30.31	12.35	13.37	2.04	2.65	4.23	2.09	11.84	13.27	16.38	8	3.47	2.29	Subadult	M	Indeterminate	-7.47083	-36.8808	0.244	27.013	Chrom1	Deme2
WLSV4772	PB	Almas	Aw	Caatinga	SEArA	875	668	19.2	27.8	29.85	11.21	12.17	1.75	1.9	3.82	2.17	10.08	10.9	15.03	6.31	3.3	1.98	Subadult	M	Indeterminate	-7.47083	-36.8808	0.067	26.48	Chrom2	Deme2
WLSV4773	PB	Almas	Aw	Caatinga	SEArA	875	668	19.2	27.8	25.65	11.19	11.65	1.5	3.19	3.98	2.25	11.84	11.81	14.86	6.79	2.69	2.06	Subadult	F	Indeterminate	-7.47083	-36.8808	0.076	22.323	Chrom6	Deme2
WLSV4774	PB	Almas	Aw	Caatinga	SEArA	875	668	19.2	27.8	33.22	12.76	13.77	2.22	2.78	4.3	2.5	11.64	12.68	16.71	7.6	2.91	2.4	Subadult	F	Indeterminate	-7.47083	-36.8808	0.046	19.462	Chrom1	Deme2
WLSV4775	PB	Almas	Aw	Caatinga	SEArA	875	668	19.2	27.8	30.54	12.95	13.7	1.88	3.08	4.32	2.31	12.01	12.44	17.2	7.23	3.1	2.3	Subadult	M	Indeterminate	-7.47083	-36.8808	0.097	20.774	Chrom6	Deme2
WLSV4776	PB	Almas	Aw	Caatinga	SEArA	875	668	19.2	27.8	26.58	9.14	10.74	1.74	1.85	3.58	2.26	10.91	10.57	15.17	6.7	2.86	1.91	Subadult	M	Indeterminate	-7.47083	-36.8808	0.158	22.289	Chrom4	Deme2
WLSV4777	PB	Almas	Aw	Caatinga	SEArA	875	668	19.2	27.8	30.16	11.79	12.71	2.23	2.7	4.05	2.59	12.39	12.12	16.83	7.06	2.73	2.44	Subadult	F	Indeterminate	-7.47083	-36.8808	0.066	17.892	Chrom2	Deme2
WLSV4778	PB	Almas	Aw	Caatinga	SEArA	875	668	19.2	27.8	27.18	11.23	12.89	1.55	2.17	4.25	2.35	11.13	11.95	16.72	6.04	3	2.31	Subadult	F	Indeterminate	-7.47083	-36.8808	0.046	21.807	Chrom6	Deme2
WLSV4779	PB	Almas	Aw	Caatinga	SEArA	875	668	19.2	27.8	31.03	11.83	12.84	1.97	2.23	4.37	2.26	11.68	12.8	17.59	7.52	3	2.19	Subadult	F	Indeterminate	-7.47083	-36.8808	0.078	19.518	Chrom2	Deme2
WLSV4789	PB	Almas	Aw	Caatinga	SEArA	875	668	19.2	27.8	33.33	10.91	12.19	1.43	2.15	3.78	2.38	11.47	13.53	16.78	6.71	2.76	2.73	Subadult	M	Indeterminate	-7.47083	-36.8808	0.085	20.779	Chrom1	Deme2
WLSV4791	PB	Almas	Aw	Caatinga	SEArA	875	668	19.2	27.8	30.34	11.32	12.44	1.92	2.57	3.59	2.07	10.06	11.46	15.98	6.65	2.58	2.44	Subadult	F	Indeterminate	-7.47083	-36.8808	0.02	20.901	Chrom2	Deme2
WLSV813	PB	Almas	Aw	Caatinga	SEArA	875	668	19.2	27.8	53.31	18.54	24.05	3.18	3.9	4.95	4.04	19.86	18.48	28.83	13.04	4.59	3.88	Adult	F	Indeterminate	-7.47083	-36.8808	0.076	20.602	Chrom5	Deme2
WLSV814	PB	Almas	Aw	Caatinga	SEArA	875	668	19.2	27.8	45.12	15.52	19	3.96	3.4	5.84	3.97	18.27	15.78	25.5	11.58	3.89	4.18	Adult	M	Indeterminate	-7.47083	-36.8808	0.106	15.311	Chrom2	Deme2
UFPB4270	PB	Almas	Aw	Caatinga	SEArA	875	668	19.2	27.8	15.35	6.43	6.12	1.06	1.01	2.55	1.63	6.7	6.69	9.16	3	0.96	0.99	Juvenile	M	Immature	-7.47083	-36.8808	0.012	10.725	Chrom5	Deme2
UFPB4267	PB	Almas	Aw	Caatinga	SEArA	875	668	19.2	27.8	23.26	9.22	9.95	1.51	1.78	3.48	2.6	9.07	7.52	12.5	4.72	2.28	1.96	Juvenile	M	Immature	-7.47083	-36.8808	0.077	12.03	Chrom6	Deme2
UFPB9699	PE	Arcverde	Aw	FCB	FOVSA	798.1	206	18.4	29.3	29.33	11.21	12.48	1.42	2.19	3.35	3.06	10.15	9.68	16.76	6.74	2.7	2.64	Subadult	M	Indeterminate	-8.43749	-37.0485	0.045	8.335	Chrom5	Deme4
UFPB9689	PE	Arcverde	Aw	FCB	FOVSA	798.1	206	18.4	29.3	28.32	10.35	13.14	1.52	2.14	3.69	3.05	11.51	9.15	14.86	6.2	2.45	2.29	Subadult	M	Indeterminate	-8.43749	-37.0485	0.272	19.681	Chrom1	Deme4
UFPB9685	PE	Arcverde	Aw	FCB	FOVSA	798.1	206	18.4	29.3	35.38	12.78	16.06	3.36	2.86	3.94	3.31	15.67	12.91	22.19	8.96	4.22	3.25	Adult	F	Mature	-8.43749	-37.0485	0.162	26.279	Chrom6	Deme4
UFPB9690	PE	Arcverde	Aw	FCB	FOVSA	798.1	206	18.4	29.3	23.56	9.5	9.86	1.37	1.89	3.3	2.37	8.71	7.82	13.09	5.34	2.33	2.08	Juvenile	F	Immature	-8.43749	-37.0485	0.014	5.151	Chrom2	Deme4
UFPB9697	PE	Arcverde	Aw	FCB	FOVSA	798.1	206	18.4	29.3	16.35	7.2	7.73	0.7	1.38	2.45	1.83	6.03	5.62	9.85	3.7	1.96	1.78	Juvenile	F	Immature	-8.43749	-37.0485	0.03	15.308	Chrom2	Deme4
UFPB9688	PE	Arcverde	Aw	FCB	FOVSA	798.1	206	18.4	29.3	43.72	15.96	17.1	2.29	3.5	5.3	3.93	16.39	14.59	23.63	8.9	4.48	3.26	Adult	F	Indeterminate	-8.43749	-37.0485	0.047	12.658	Chrom5	Deme4
UFPB9695	PE	Arcverde	Aw	FCB	FOVSA	798.1	206	18.4	29.3	32.87	13.06	15	1.8	2.72	3.42	3.23	13.01	10.6	18.75	6.99	3.02	3.11	Subadult	F	Mature	-8.43749	-37.0485	0.053	17.517	Chrom6	Deme4
UFPB9693	PE	Arcverde	Aw	FCB	FOVSA	798.1	206	18.4	29.3	31.85	11.95	14.42	2.485	2.815	3.98	2.725	12.375	10.785	16.58	7.525	3.51	3.315	Subadult	F	Mature	-8.43749	-37.0485	0.067	15.684	Chrom5	Deme4
UFPB9698	PE	Arcverde	Aw	FCB	FOVSA	798.1	206	18.4	29.3	26.1	10.22	10.58	1.85	2.03	3.58	2.27	10	9	14.64	5.76	2.79	2.44	Subadult	M	Indeterminate	-8.43749	-37.0485	0.077	26.247	Chrom2	Deme4
UFPB9696	PE	Arcverde	Aw	FCB	FOVSA	798.1	206	18.4	29.3	24.48	9.73	10.24	2.31	2.91	3.86	2.74	9.66	8.76	13.68	5.82	3.27	3.02	Juvenile	M	Immature	-8.43749	-37.0485	0.131	30.32	Chrom2	Deme4
UFPB9691	PE	Arcverde	Aw	FCB	FOVSA	798.1	206	18.4	29.3	23.95	10.52	11.12	1.56	2.3	3.18	2.32	9.88	7.74	14.14	5.45	2.72	2.25	Juvenile	F	Immature	-8.43749	-37.0485	0.044	10.201	Chrom3	Deme4
UFPB9694	PE	Arcverde	Aw	FCB	FOVSA	798.1	206	18.4	29.3	23.26	8.75	10.56	0.79	1.82	2.75	2.11	9.51	7.54	13.09	5.9	2.06	2.06	Juvenile	F	Immature	-8.43749	-37.0485	0.064	17.175	Chrom2	Deme4
UFPB9683	PE	Arcverde	Aw	FCB	FOVSA	798.1	206	18.4	29.3	22.3	9.86	10.5	1.33	1.56	2.88	1.77	9.64	8.63	13.69	5.84	2.07	1.98	Juvenile	F	Immature	-8.43749	-37.0485	0.066	14.958	Chrom6	Deme4
UFPB9686	PE	Arcverde	Aw	FCB	FOVSA	798.1	206	18.4	29.3	45.59	16.1	21.02	2.66	3.51	5.42	3.24	15.77	14.12	23.22	10.34	4.03	3.71	Adult	M	Indeterminate	-8.43749	-37.0485	0.285	33.324	Chrom1	Deme4
UFPB9692	PE	Arcverde	Aw	FCB	FOVSA	798.1	206	18.4	29.3	39.75	14.52	17.5	2.45	2.68	5.66	2.64	15.42	12.84	22.23	9.13	4.16	3.21	Adult	M	Mature	-8.43749	-37.0485	0.108	15.678	Chrom2	Deme4
UFPB9678	PE	Arcverde	Aw	FCB	FOVSA	798.1	206	18.4	29.3	39.24	14.42	17.48	2.01	3.17	4.66	2.71	15.11	13.64	22.62	9.15	3.53	3.72	Adult	F	Mature	-8.43749	-37.0485	0.039	5.259	Chrom5	Deme4
UFPB9684	PE	Arcverde	Aw	FCB	FOVSA	798.1	206	18.4	29.3	36.84	13.97	16.17	2.2	2.38	4.22	1.87	14.49	12.64	20.52	9.34	3.7	2.96	Adult	M	Mature	-8.43749	-37.0485	0.153	14.69	Chrom6	Deme4
UFPB9682	PE	Arcverde	Aw	FCB	FOVSA	798.1	206	18.4	29.3	42.23	15.31	17.7	2.15	2.76	4.91	1.97	13.92	12.82	22.8	9.73	3.96	3.37	Adult	M	Mature	-8.43749	-37.0485	0.08	19.048	Chrom2	Deme4
UFPB9687	PE	Arcverde	Aw	FCB	FOVSA	798.1	206	18.4	29.3	42.61	16.98	19.82	2.18	3.08	5.51	2.82	17.44	15.23	24.7	9.51	4.24	3.55	Adult	F	Indeterminate	-8.43749	-37.0485	0.201	33.073	Chrom2	Deme4
UFPB9680	PE	Arcverde	Aw	FCB	FOVSA	798.1	206	18.4	29.3	49.77	16.99	22.48	2.66	3.63	5.59	2.42	18.91	16.72	27.03	11.4	5.1	3.77	Adult	F	Mature	-8.43749	-37.0485	0.074	14.303	Chrom3	Deme4
UFPB9701	PE	Arcverde	Aw	FCB	FOVSA	798.1	206	18.4	29.3	39.19	15.94	17.4	1.56	2.92	5.47	2.11	15.9	12.89	21.67	9.38	3.76	3.18	Adult	M	Indeterminate	-8.43749	-37.0485	0.232	24.08	Chrom6	Deme4
UFPB9681	PE	Arcverde	Aw	FCB	FOVSA	798.1	206	18.4	29.3	50.63	17.59	22.91	2.75	3.77	5.62	3.46	20.31	17.6	27.1	11.61	4.9	4.16	Adult	F	Mature	-8.43749	-37.0485	0.184	11.724	Chrom3	Deme4
UFPB9679	PE	Arcverde	Aw	FCB	FOVSA	798.1	206	18.4	29.3	46.36	15.96	18.9	2.62	3.4	5.78	2.95	16.86	14.37	25.25	10.43	4.67	3.48	Adult	F	Mature	-8.43749	-37.0485	0.071	10.388	Chrom2	Deme4
UFPB7098	PE	Bezerros	Aw	FCB	FOVSA	798.1	206	18.4	29.3	49.57	19.56	22.36	2.28	4.35	6.11	2.9	18	16.56	27.77	10.47	4.87	3.82	Adult	F	Indeterminate	-8.89	-36.4928	0.25	22.465	Chrom2	Deme5
UFPB1578	PB	Boavista	Aw	Caatinga	AreIU	875.4	479	19.2	27.8	38.68	15.17	18.64	2.36	3.06	5.25	3.34	18.15	15.52	23.98	10.02	4.1	3.66	Adult	F	Indeterminate	-7.26054	-36.2489	0.098	21.955	Chrom2	Deme4
UFPB1572	PB	Boavista	Aw	Caatinga	AreIU	875.4	479	19.2	27.8	34.84	14.55	15.32	2.32	2.35	4.62	3.13	13.95	11.32	21.52	8.43	3.14	2.61	Subadult	F	Mature	-7.26054	-36.2489	0.146408	20.5674	Chrom3	Deme4
UFPB1571	PB	Boavista	Aw	Caatinga	AreIU	875.4	479	19.2	27.8	20.75	8.36	8.78	1.25	1.68	3.39	1.51	7.41	7.11	8.71	5.54	1.17	1.94	Juvenile	F	Immature	-7.26054	-36.2489	0.1295	24.6507		Deme4
UFPB1580	PB	Boavista	Aw	Caatinga	AreIU	875.4	479	19.2	27.8	39.06	16.25	18.25	2.59	3.39	5.26	2.53	16.18	14.4	23	9.85	3.83	3.6	Adult	M	Indeterminate	-7.26054	-36.2489	0.127	28.822	Chrom2	Deme4
UFPB1577	PB	Boavista	Aw	Caatinga	AreIU	875.4	479	19.2	27.8	34.72	14.52	17.38	2.36	3.26	5.39	2.16	15.39	13.33	21.35	7	3.87	3.39	Subadult	M	Indeterminate	-7.26054	-36.2489	0.236	15.774	Chrom2	Deme4
UFPB1575	PB	Boavista	Aw	Caatinga	AreIU	875.4	479	19.2	27.8	46.61	18.22	21.98	2.32	3.6	5.46	2.26	19.87	17.42	25.92	13.21	4.6	4.41	Adult	F	Mature	-7.26054	-36.2489	0.11	14.627	Chrom6	Deme4
UFPB1573	PB	Boavista	Aw	Caatinga	AreIU	875.4	479	19.2	27.8	49.27	20.13	21.99	3.46	2.21	5.78	1.97	19.51	17.25	29.2	11.99	5.41	4.16	Adult	F	Indeterminate	-7.26054	-36.2489	0.121	13.783	Chrom2	Deme4
UFPB1574	PB	Boavista	Aw	Caatinga	AreIU	875.4	479	19.2	27.8	38.06	15.15	17	2.42	2.94	5.49	2.53	14.61	12.28	20.96	10.4	3.82	3.14	Adult	M	Indeterminate	-7.26054	-36.2489	0.158	25.417	Chrom6	Deme4
UFPB1576	PB	Boavista	Aw	Caatinga	AreIU	875.4	479	19.2	27.8	38.15	15.57	17.17	2.22	3.07	5.46	2.29	14.85	13.08	22.06	9.39	3.97	3.45	Adult	M	Indeterminate	-7.26054	-36.2489	0.07	8.722	Chrom2	Deme4
UFPB1581	PB	Boavista	Aw	Caatinga	AreIU	875.4	479	19.2	27.8	46.05	18.59	21.72	2.82	3.63	6.6	3.75	19.18	16.05	27.17	11.38	5.1	4.11	Adult	F	Indeterminate	-7.26054	-36.2489	0.325	20.398	Chrom2	Deme4
UFPB1579	PB	Boavista	Aw	Caatinga	AreIU	875.4	479	19.2	27.8	31.46	13	14.34	1.95	2.5	4.7	2.55	13.63	10.3	20.2	7.4	2.83	2.66	Subadult	M	Mature	-7.26054	-36.2489	0.142352	21.5469	Chrom2	Deme4
z1	PB	Boavista	Aw	Caatinga	AreIU	875.4	479	19.2	27.8	31.46	13	14.34	1.95	2.5	4.7	2.55	13.63	10.3	20.2	7.4	2.83	2.66	Subadult	M	Mature	-7.26054	-36.2489	0.142352	21.5469	Chrom2	Deme4
z2	PB	Boavista	Aw	Caatinga	AreIU	875.4	479	19.2	27.8	34.72	14.52	17.38	2.36	3.26	5.39	2.16	15.39	13.33	21.35	7	3.87	3.39	Subadult	M	Indeterminate	-7.26054	-36.2489	0.236	15.774	Chrom2	Deme4
z3	PB	Boavista	Aw	Caatinga	AreIU	875.4	479	19.2	27.8	34.84	14.55	15.32	2.32	2.35	4.62	3.13	13.95	11.32	21.52	8.43	3.14	2.61	Subadult	F	Mature	-7.26054	-36.2489	0.146408	20.5674	Chrom3	Deme4
z4	PB	Boavista	Aw	Caatinga	AreIU	875.4	479	19.2	27.8	38.06	15.15	17	2.42	2.94	5.49	2.53	14.61	12.28	20.96	10.4	3.82	3.14	Adult	M	Indeterminate	-7.26054	-36.2489	0.158	25.417	Chrom6	Deme4
z5	PB	Boavista	Aw	Caatinga	AreIU	875.4	479	19.2	27.8	38.05	15.14	17.01	2.43	2.95	5.5	2.53	14.61	12.3	20.97	10.41	3.84	3.15	Adult	M	Indeterminate	-7.26054	-36.2489	0.158	25.417	Chrom6	Deme4
z6	PB	Boavista	Aw	Caatinga	AreIU	875.4	479	19.2	27.8	38.06	15.15	17	2.42	2.94	5.49	2.53	14.61	12.28	20.96	10.4	3.82	3.14	Adult	M	Indeterminate	-7.26054	-36.2489	0.158	25.417	Chrom6	Deme4
z7	PB	Boavista	Aw	Caatinga	AreIU	875.4	479	19.2	27.8	38.15	15.57	17.17	2.22	3.07	5.46	2.29	14.85	13.08	22.06	9.39	3.97	3.45	Adult	M	Indeterminate	-7.26054	-36.2489	0.07	8.722	Chrom2	Deme4
z8	PB	Boavista	Aw	Caatinga	AreIU	875.4	479	19.2	27.8	38.16	15.58	17.15	2.22	3.07	5.46	2.27	14.84	13.08	22.05	9.39	3.97	3.45	Adult	M	Indeterminate	-7.26054	-36.2489	0.07	8.722	Chrom2	Deme4
z9	PB	Boavista	Aw	Caatinga	AreIU	875.4	479	19.2	27.8	38.15	15.57	17.17	2.22	3.07	5.46	2.29	14.85	13.09	22.06	9.4	3.98	3.45	Adult	M	Indeterminate	-7.26054	-36.2489	0.07	8.722	Chrom2	Deme4
z10	PB	Boavista	Aw	Caatinga	AreIU	875.4	479	19.2	27.8	38.14	15.55	17.18	2.22	3.07	5.46	2.29	14.85	13.08	22.06	9.39	3.97	3.44	Adult	M	Indeterminate	-7.26054	-36.2489	0.07	8.722	Chrom2	Deme4
z11	PB	Boavista	Aw	Caatinga	AreIU	875.4	479	19.2	27.8	38.68	15.17	18.64	2.36	3.07	5.25	3.34	18.15	15.52	23.98	10.02	4.1	3.66	Adult	F	Indeterminate	-7.26054	-36.2489	0.098	21.955	Chrom2	Deme4
z12	PB	Boavista	Aw	Caatinga	AreIU	875.4	479	19.2	27.8	38.69	15.17	18.64	2.35	3.06	5.24	3.34	18.14	15.53	23.97	10.02	4.1	3.66	Adult	F	Indeterminate	-7.26054	-36.2489	0.098	21.955	Chrom2	Deme4
z13	PB	Boavista	Aw	Caatinga	AreIU	875.4	479	19.2	27.8	38.68	15.17	18.64	2.36	3.05	5.25	3.33	18.15	15.52	23.96	10.02	4.1	3.66	Adult	F	Indeterminate	-7.26054	-36.2489	0.098	21.955	Chrom2	Deme4
z14	PB	Boavista	Aw	Caatinga	AreIU	875.4	479	19.2	27.8	39.06	16.25	18.25	2.59	3.39	5.26	2.52	16.18	14.41	22	9.85	3.83	3.6	Adult	M	Indeterminate	-7.26054	-36.2489	0.127	28.822	Chrom2	Deme4
z15	PB	Boavista	Aw	Caatinga	AreIU	875.4	479	19.2	27.8	39.06	16.26	18.25	2.59	3.39	5.26	2.53	16.19	14.4	23.01	9.86	3.83	3.6	Adult	M	Indeterminate	-7.26054	-36.2489	0.127	28.822	Chrom2	Deme4
z16	PB	Boavista	Aw	Caatinga	AreIU	875.4	479	19.2	27.8	39.06	16.25	18.25	2.6	3.39	5.26	2.53	16.18	14.4	23	9.85	3.83	3.6	Adult	M	Indeterminate	-7.26054	-36.2489	0.127	28.822	Chrom2	Deme4
z17	PB	Boavista	Aw	Caatinga	AreIU	875.4	479	19.2	27.8	46.05	18.59	21.72	2.82	3.63	6.6	3.75	19.18	16.05	27.17	11.38	5.1	4.11	Adult	F	Indeterminate	-7.26054	-36.2489	0.325	20.398	Chrom2	Deme4
z18	PB	Boavista	Aw	Caatinga	AreIU	875.4	479	19.2	27.8	46.61	18.22	21.98	2.32	3.6	5.46	2.26	19.87	17.42	25.92	13.21	4.6	4.41	Adult	F	Mature	-7.26054	-36.2489	0.11	14.627	Chrom6	Deme4
CHUFPB22175	PE	Buíque	Aw	Caatinga	SEArA	798.1	817	18.4	29.3	39.34	15.01	19.06	2.69	2.53	5.19	3.4	15.46	14.7	23.2	10.43	3.53	4.07	Adult	M	Mature	-8.61603	-37.1656	0.098	14.699	Chrom1	Deme4
CHUFPB20672	PE	Buíque	Aw	Caatinga	SEArA	798.1	817	18.4	29.3	43.26	15	18.83	2.58	2.57	5.52	3.55	18.11	14.47	24.37	10.25	4.46	3.84	Adult	M	Indeterminate	-8.61603	-37.1656	0.396	33.051	Chrom1	Deme4
CHUFPB21057	PE	Buíque	Aw	Caatinga	SEArA	798.1	817	18.4	29.3	40.99	14.69	18.69	2.57	2.27	4.84	3.45	17.75	23.66	24	9.33	3.52	3.95	Adult	M	Indeterminate	-8.61603	-37.1656	0.094	18.432	Chrom2	Deme4
CHUFPB22174	PE	Buíque	Aw	Caatinga	SEArA	798.1	817	18.4	29.3	35.2	14.99	17.17	2.65	2.3	5.4	3.5	14.97	13.06	21.3	7.83	3.49	4.09	Adult	M	Indeterminate	-8.61603	-37.1656	0.155	19.222	Chrom6	Deme4
CHUFPB20924	PE	Buíque	Aw	Caatinga	SEArA	798.1	817	18.4	29.3	39.9	17.65	16.84	2.1	2.37	4.41	3.28	16.25	13.76	22.55	10.26	3.39	3.51	Adult	M	Indeterminate	-8.61603	-37.1656	0.063	21.036	Chrom6	Deme4
CHUFPB19908	PE	Buíque	Aw	Caatinga	SEArA	798.1	817	18.4	29.3	43.34	17.9	19.2	2.69	2.82	5.53	4.14	19.36	14.99	24.11	10.14	4.4	4.38	Adult	M	Indeterminate	-8.61603	-37.1656	0.183	29.783	Chrom6	Deme4
CHUFPB19978	PE	Buíque	Aw	Caatinga	SEArA	798.1	817	18.4	29.3	43.34	17.9	19.2	2.69	2.82	5.53	4.14	19.36	14.99	24.11	10.14	4.4	4.19	Adult	M	Indeterminate	-8.61603	-37.1656	0.081	21.74	Chrom2	Deme4
CHUFPB19920	PE	Buíque	Aw	Caatinga	SEArA	798.1	817	18.4	29.3	42.78	16.08	20.37	3.02	3.04	4.78	3.55	18.13	15.52	23.91	10.66	4.24	4.57	Adult	M	Indeterminate	-8.61603	-37.1656	0.17	17.764	Chrom2	Deme4
CHUFPB20868	PE	Buíque	Aw	Caatinga	SEArA	798.1	817	18.4	29.3	37.65	13.72	16.06	2.69	2.34	4.79	4.42	16.51	14.51	24	8.71	3.89	3.36	Adult	M	Indeterminate	-8.61603	-37.1656	0.14	35.151	Chrom6	Deme4
CHUFPB19903	PE	Buíque	Aw	Caatinga	SEArA	798.1	817	18.4	29.3	59.93	23.99	24.56	3.86	4	8.2	4.59	24.76	21.4	36.04	13.05	6	4.45	Adult	F	Mature	-8.61603	-37.1656	0.083	11.922	Chrom2	Deme4
CHUFPB20884	PE	Buíque	Aw	Caatinga	SEArA	798.1	817	18.4	29.3	38.12	16.84	17.44	2.4	2.7	5.08	3.69	17.24	15.07	24.04	9.8	3.84	3.64	Adult	M	Indeterminate	-8.61603	-37.1656	0.134	14.212	Chrom6	Deme4
CHUFPB20833	PE	Buíque	Aw	Caatinga	SEArA	798.1	817	18.4	29.3	45.76	16.61	20.36	2.84	3.71	5.91	4.22	4.66	17.32	25.77	10.55	4.21	3.71	Adult	M	Indeterminate	-8.61603	-37.1656	0.101	22.512	Chrom1	Deme4
CHUFPB19977	PE	Buíque	Aw	Caatinga	SEArA	798.1	817	18.4	29.3	53.11	21.63	23.85	3.5	3.76	7.1	4.52	22.1	18.83	30.02	12.66	5.19	4.82	Adult	F	Indeterminate	-8.61603	-37.1656	0.112	26.396	Chrom2	Deme4
CHUFPB19921	PE	Buíque	Aw	Caatinga	SEArA	798.1	817	18.4	29.3	61.06	22.83	26.48	4.04	3.66	6.83	4.98	25.21	21.93	35.37	14.3	5.53	5.38	Adult	F	Indeterminate	-8.61603	-37.1656	0.161	30.756	Chrom2	Deme4
CHUFPB20855	PE	Buíque	Aw	Caatinga	SEArA	798.1	817	18.4	29.3	43.1	15.5	19.1	3.31	3.63	6.12	3.77	17.33	15.34	23.89	10.43	4.14	3.73	Adult	M	Indeterminate	-8.61603	-37.1656	0.141	34.211	Chrom6	Deme4
CHUFPB20830	PE	Buíque	Aw	Caatinga	SEArA	798.1	817	18.4	29.3	42.06	17.58	17.67	2.73	2.85	5.84	3.35	15.47	14.32	22.84	9.24	3.91	3.86	Adult	M	Indeterminate	-8.61603	-37.1656	0.135	17.101	Chrom2	Deme4
CHUFPB19895	PE	Buíque	Aw	Caatinga	SEArA	798.1	817	18.4	29.3	44.94	19.39	19.56	3.11	3.19	6.31	3.82	17.56	16.8	26.3	13.36	4.53	4.63	Adult	M	Indeterminate	-8.61603	-37.1656	0.089	26.348	Chrom2	Deme4
UFPB11268	PB	Cabaceiras	Aw	Caatinga	SEArA	875.4	413	19.2	27.8	53.99	21.44	25.3	3.27	4.07	5.68	5.32	21.61	19.41	31.26	13.15	5.01	4.1	Adult	F	Mature	-7.46966	-36.3058	0.186	11.99	Chrom2	Deme5
UFPB11266	PB	Cabaceiras	Aw	Caatinga	SEArA	875.4	413	19.2	27.8	52.85	20.4	23.97	3.1	3.84	5.86	5.23	20.07	19.34	30.06	9.99	4.39	3.85	Adult	F	Mature	-7.46966	-36.3058	0.256	10.088	Chrom4	Deme5
UFPB11267	PB	Cabaceiras	Aw	Caatinga	SEArA	875.4	413	19.2	27.8	52.53	20.8	23.15	2.64	4.08	5.63	5.47	21.2	18.03	29.24	12.4	5.11	3.95	Adult	F	Mature	-7.46966	-36.3058	0.13	12.628	Chrom4	Deme5
UFPB11275	PB	Cabaceiras	Aw	Caatinga	SEArA	875.4	413	19.2	27.8	43.93	16.93	19.01	2.52	3.05	4.77	4.14	18.04	15.67	24.6	10.23	4.05	3.26	Adult	F	Mature	-7.46966	-36.3058	0.164	18.869	Chrom1	Deme5
UFPB11269	PB	Cabaceiras	Aw	Caatinga	SEArA	875.4	413	19.2	27.8	39.45	15	18.75	3.41	3.7	5.45	3.68	15.52	14.48	23.59	9.26	3.93	3.73	Adult	M	Indeterminate	-7.46966	-36.3058	0.08	20.075	Chrom1	Deme5
UFPB11270	PB	Cabaceiras	Aw	Caatinga	SEArA	875.4	413	19.2	27.8	38.72	15.16	18.23	2.53	3.08	5.39	2.52	14.08	14.02	23.02	9.31	4.18	3.32	Adult	M	Indeterminate	-7.46966	-36.3058	0.121	15.395	Chrom2	Deme5
UFPB11273	PB	Cabaceiras	Aw	Caatinga	SEArA	875.4	413	19.2	27.8	42.85	16.11	18.7	2.77	3.14	5.86	2.43	16.99	14.99	24.29	10.53	4.34	3.72	Adult	M	Indeterminate	-7.46966	-36.3058	0.38	20.169	Chrom2	Deme5
UFPB6692	PB	Cabaceiras	Aw	Caatinga	SEArA	875.4	413	19.2	27.8	42.76	14.96	17.83	2.27	2.96	5.99	2.76	15.53	14.13	22.39	8.27	4.11	3.72	Adult	M	Indeterminate	-7.46966	-36.3058	0.038	13.759	Chrom2	Deme5
UFPB6694	PB	Cabaceiras	Aw	Caatinga	SEArA	875.4	413	19.2	27.8	39.67	15.54	18.18	2.05	3.38	5.16	2.2	14.35	12.69	21.93	9.7	3.96	3.13	Adult	M	Indeterminate	-7.46966	-36.3058	0.149	18.947	Chrom6	Deme5
UFPB11271	PB	Cabaceiras	Aw	Caatinga	SEArA	875.4	413	19.2	27.8	42.67	16.72	20.44	3	3.28	5.32	2.7	17.15	15.19	24.24	10.62	5.23	4.02	Adult	M	Indeterminate	-7.46966	-36.3058	0.117	15.961	Chrom2	Deme5
UFPB6693	PB	Cabaceiras	Aw	Caatinga	SEArA	875.4	413	19.2	27.8	41.43	15.98	18.55	2.46	3.36	5.59	2.59	15.9	14.6	22.64	9.59	4.55	3.75	Adult	M	Mature	-7.46966	-36.3058	0.249	19.697	Chrom6	Deme5
UFPB11274	PB	Cabaceiras	Aw	Caatinga	SEArA	875.4	413	19.2	27.8	44.01	16.36	19.51	2.25	2.96	5.05	2.21	14.18	13.97	20.28	9.81	4.08	3.25	Adult	M	Indeterminate	-7.46966	-36.3058	0.214	23.777	Chrom2	Deme5
UFPB11272	PB	Cabaceiras	Aw	Caatinga	SEArA	875.4	413	19.2	27.8	42.1	17	19.04	2.49	2.9	6.26	3.29	16.58	14.97	24.15	10.7	4.05	3.25	Adult	M	Indeterminate	-7.46966	-36.3058	0.098	19.607	Chrom2	Deme5
UFPB6691	PB	Cabaceiras	Aw	Caatinga	SEArA	875.4	413	19.2	27.8	46.2	17.81	20.13	2.82	3.46	5.46	3.3	16.89	15.36	24.03	11.37	4.07	4.11	Adult	M	Indeterminate	-7.46966	-36.3058	0.105	19.212	Chrom2	Deme5
UFPB11276	PB	Cabaceiras	Aw	Caatinga	SEArA	875.4	413	19.2	27.8	44.75	17.79	19.33	2.33	2.9	5.23	2.81	15.9	14.19	22.69	10.34	4.45	3.43	Adult	M	Indeterminate	-7.46966	-36.3058	0.153	20.368	Chrom2	Deme5
UFPB14905	RN	Caico	Aw	Caatinga	SEArA	704.7	156	21.9	33.2	64.17	26.25	22.11	3.73	4.4	6.11	5.58	20.43	19.27	29.49	14.02	5.78	4.81	Adult	F	Mature	-6.45402	-37.1004	0.345	28.685	Chrom2	Deme3
UFPB14904	RN	Caico	Aw	Caatinga	SEArA	704.7	156	21.9	33.2	49.33	19.69	16.13	2.71	3.44	5.2	4.07	16.7	13.23	21.46	9.52	4.35	3.74	Adult	M	Mature	-6.45402	-37.1004	0.228	21.324	Chrom2	Deme3
UFPB14903	RN	Caico	Aw	Caatinga	SEArA	704.7	156	21.9	33.2	46.29	18.37	16.97	2.5	2.68	5.5	3.89	16.59	14.97	23.4	9.65	4.13	3.96	Adult	M	Mature	-6.45402	-37.1004	0.436	25.303	Chrom1	Deme3
UFPB14906	RN	Caico	Aw	Caatinga	SEArA	704.7	156	21.9	33.2	43.78	19.88	17.46	3.1	3.33	5.63	3.86	16.92	15.16	23.86	9.66	4.61	3.84	Adult	M	Mature	-6.45402	-37.1004	0.106	25.624	Chrom5	Deme3
z25	RN	Caico	Aw	Caatinga	SEArA	704.7	156	21.9	33.2	46.29	18.37	16.97	2.5	2.68	5.5	3.89	16.59	14.97	23.4	9.65	4.13	3.96	Adult	M	Mature	-6.45402	-37.1004	0.436	25.303	Chrom1	Deme3
z28	RN	Caico	Aw	Caatinga	SEArA	704.7	156	21.9	33.2	49.34	19.69	16.13	2.72	3.44	5.21	4.07	16.7	13.23	21.45	9.52	4.35	3.74	Adult	M	Mature	-6.45402	-37.1004	0.228	21.324	Chrom2	Deme3
z29	RN	Caico	Aw	Caatinga	SEArA	704.7	156	21.9	33.2	49.33	19.69	16.12	2.71	3.44	5.2	4.06	16.69	13.22	21.46	9.51	4.35	3.73	Adult	M	Mature	-6.45402	-37.1004	0.228	21.324	Chrom2	Deme3
z30	RN	Caico	Aw	Caatinga	SEArA	704.7	156	21.9	33.2	49.33	19.7	16.13	2.71	3.45	5.22	4.07	16.7	13.23	21.46	9.52	4.34	3.74	Adult	M	Mature	-6.45402	-37.1004	0.228	21.324	Chrom2	Deme3
UFPB7086	PI	Cajueiro	Aw	Caatinga	AreIU	1596.4	8	23	31.3	23.79	10.91	11.32	1.61	2.07	3.73	2.03	8.96	8.33	15.32	5.35	2.89	2.76	Juvenile	M	Immature	-2.93219	-41.3415	0.132	13.654	Chrom2	Deme5
GGS2-01	PI	Caracol	Aw	Caatinga	SEArA	1093.4	515	20.7	32.6	41.4	15.14	19.84	2.51	4	5.71	3.43	18.75	16.25	25.69	15.03	4.65	3.58	Adult	M	Mature	-9.28131	-43.3295	0.033	8.324	Chrom5	Deme3
GGS2-02	PI	Caracol	Aw	Caatinga	SEArA	1093.4	515	20.7	32.6	55.17	21.07	25.42	3.66	4.12	6.76	4.74	24.12	21.37	32.93	18.8	6	5.61	Adult	F	Mature	-9.28131	-43.3295	0.024	7.962	Chrom5	Deme3
GGS2-03	PI	Caracol	Aw	Caatinga	SEArA	1093.4	515	20.7	32.6	42.6	14.01	20.57	3.04	3.27	6.32	3.5	17.62	16.62	25.57	15.74	4.41	4.14	Adult	M	Indeterminate	-9.28131	-43.3295	0.112	14.386	Chrom2	Deme3
GGS2-04	PI	Caracol	Aw	Caatinga	SEArA	1093.4	515	20.7	32.6	54.33	21.36	26.74	3.51	3.74	7.64	5.12	23.61	19.63	31.33	16.44	5.11	5.16	Adult	F	Indeterminate	-9.28131	-43.3295	0.049	9.783	Chrom3	Deme3
GGS2-05	PI	Caracol	Aw	Caatinga	SEArA	1093.4	515	20.7	32.6	56.13	21.97	27.21	4.3	4.53	6.75	4.54	25.45	21.01	34.61	20.22	6.29	5.05	Adult	F	Indeterminate	-9.28131	-43.3295	0.086	8.473	Chrom5	Deme3
GGS2-06	PI	Caracol	Aw	Caatinga	SEArA	1093.4	515	20.7	32.6	42.59	15.47	20.26	3.69	3.23	5.48	4.37	19.24	17.39	25.13	15.57	4.65	4.38	Adult	M	Mature	-9.28131	-43.3295	0.075	8.621	Chrom3	Deme3
GGS2-07	PI	Caracol	Aw	Caatinga	SEArA	1093.4	515	20.7	32.6	55.37	20.5	26	3.99	4.16	7.07	4.73	22.36	21.47	32.93	19.99	5.85	5.79	Adult	F	Indeterminate	-9.28131	-43.3295	0.074	11.348	Chrom5	Deme3
z37	PI	Caracol	Aw	Caatinga	SEArA	1093.4	515	20.7	32.6	42.59	15.47	20.26	3.69	3.23	5.48	4.37	19.24	17.39	25.13	15.57	4.65	4.38	Adult	M	Mature	-9.28131	-43.3295	0.075	8.621	Chrom3	Deme3
z38	PI	Caracol	Aw	Caatinga	SEArA	1093.4	515	20.7	32.6	42.6	14.01	20.57	3.04	3.27	6.32	3.5	17.62	16.62	25.57	15.74	4.41	4.14	Adult	M	Indeterminate	-9.28131	-43.3295	0.112	14.386	Chrom2	Deme3
z44	PI	Caracol	Aw	Caatinga	SEArA	1093.4	515	20.7	32.6	54.33	21.36	26.74	3.51	3.74	7.64	5.11	23.6	19.63	31.32	16.43	5.12	5.16	Adult	F	Indeterminate	-9.28131	-43.3295	0.049	9.783	Chrom3	Deme3
z45	PI	Caracol	Aw	Caatinga	SEArA	1093.4	515	20.7	32.6	54.33	21.36	26.73	3.51	3.73	7.63	5.12	23.61	19.64	31.33	16.44	5.11	5.16	Adult	F	Indeterminate	-9.28131	-43.3295	0.049	9.783	Chrom3	Deme3
z46	PI	Caracol	Aw	Caatinga	SEArA	1093.4	515	20.7	32.6	55.17	21.07	25.42	3.66	4.12	6.76	4.74	24.12	21.37	32.93	18.8	6	5.61	Adult	F	Mature	-9.28131	-43.3295	0.024	7.962	Chrom5	Deme3
z47	PI	Caracol	Aw	Caatinga	SEArA	1093.4	515	20.7	32.6	55.37	20.5	26	3.99	4.16	7.07	4.73	22.36	21.47	32.93	19.99	5.85	5.79	Adult	F	Indeterminate	-9.28131	-43.3295	0.074	11.348	Chrom5	Deme3
WLSV001	PB	Cariri	Aw	Caatinga	SEArA	875	580	19.2	27.8	21.46	9.52	9.85	1.5	1.37	3.33	1.71	7.42	7.33	12.11	4.65	2.31	2.17	Juvenile	M	Immature	-7.45825	-36.4809	0.037	9.958	Chrom6	Deme5
WLSV002	PB	Cariri	Aw	Caatinga	SEArA	875	580	19.2	27.8	37.09	14.58	17.81	2.22	2.57	5.42	2.93	13.65	13	20.65	8.5	3.73	3.19	Adult	M	Indeterminate	-7.45825	-36.4809	0.058	8.967	Chrom2	Deme5
WLSV596	PB	Cariri	Aw	Caatinga	SEArA	875	580	19.2	27.8	33.38	12.66	13.83	1.69	2.2	4.14	2.46	13.37	12.67	18.61	7.67	3.22	2.45	Subadult	M	Indeterminate	-7.45825	-36.4809	0.015	8.056	Chrom5	Deme5
WLSV173	PB	Cariri	Aw	Caatinga	SEArA	875	668	19.2	27.8	40.77	14.55	18.06	2.21	3.56	3.56	2.98	16.64	15.51	23.18	9.93	3.76	3.31	Adult	M	Mature	-7.45825	-36.4809	0.104	21.88	Chrom6	Deme5
WLSV904	PB	Cariri	Aw	Caatinga	SEArA	875	580	19.2	27.8	47.91	17.73	21.11	2.44	3.39	6.17	3.14	18.76	16.39	26.76	12.13	4.44	3.75	Adult	F	Indeterminate	-7.45825	-36.4809	0.342	19.02	Chrom6	Deme5
WLSV900	PB	Cariri	Aw	Caatinga	SEArA	875	580	19.2	27.8	51.27	19.38	23.03	2.54	3.94	6.02	2.76	21.66	17.83	29.65	13.39	4.78	4.17	Adult	F	Indeterminate	-7.45825	-36.4809	0.213	12.973	Chrom6	Deme5
WLSV906	PB	Cariri	Aw	Caatinga	SEArA	875	580	19.2	27.8	43.54	16.06	18.68	2.38	3.1	5.77	2.28	15.73	14.1	23.2	10.04	4.23	3.47	Adult	M	Mature	-7.45825	-36.4809	0.177	17.409	Chrom2	Deme5
WLSV886	PB	Cariri	Aw	Caatinga	SEArA	875	580	19.2	27.8	44.77	16.96	19.99	2.44	3.38	5.84	2.89	17.51	14.68	24.54	9.99	4.48	4.01	Adult	M	Mature	-7.45825	-36.4809	0.047	8.537	Chrom1	Deme5
WLSV967	PB	Cariri	Aw	Caatinga	SEArA	875	580	19.2	27.8	41.2	15	18.04	2.21	3.1	5.4	2.65	17.42	14.45	24.22	9.73	3.86	3.54	Adult	M	Indeterminate	-7.45825	-36.4809	0.246	18.136	Chrom2	Deme5
WLSV903	PB	Cariri	Aw	Caatinga	SEArA	875	580	19.2	27.8	42.08	15.42	18.74	2.2	2.99	5.49	2.56	15.28	13.45	23.08	9.84	3.86	3.27	Adult	M	Indeterminate	-7.45825	-36.4809	0.178	14.045	Chrom2	Deme5
WLSV966	PB	Cariri	Aw	Caatinga	SEArA	875	580	19.2	27.8	40.78	17.2	19.11	2.28	2.68	5.75	2.5	17.59	14.74	24.47	9.69	3.96	3.06	Adult	M	Indeterminate	-7.45825	-36.4809	0.164	11.329	Chrom4	Deme5
WLSV258	PB	Cariri	Aw	Caatinga	SEArA	875	580	19.2	27.8	68.81	21.13	26.56	3.05	4.22	6.93	4.38	23.17	18.93	30.08	12.93	5.86	5.7	Adult	F	Mature	-7.45825	-36.4809	0.2	13.42	Chrom6	Deme5
WLSV245	PB	Cariri	Aw	Caatinga	SEArA	875	580	19.2	27.8	45.55	16.64	20.56	2.54	2.98	6.2	2.85	16.92	14.75	24.24	9.61	4.66	3.71	Adult	M	Indeterminate	-7.45825	-36.4809	0.159	17.939	Chrom4	Deme5
WLSV884	PB	Cariri	Aw	Caatinga	SEArA	875	580	19.2	27.8	42.39	15.48	19.78	2.29	3.07	5.44	2.81	16.84	15.3	23.06	9.26	4.21	3.56	Adult	M	Indeterminate	-7.45825	-36.4809	0.084	12.361	Chrom6	Deme5
WLSV209	PB	Cariri	Aw	Caatinga	SEArA	875	580	19.2	27.8	42.43	16.46	19.08	2.17	3.34	5.77	3.37	17.58	15.22	25.25	10.16	4.53	3.66	Adult	M	Indeterminate	-7.45825	-36.4809	0.176	14.963	Chrom1	Deme5
WLSV905	PB	Cariri	Aw	Caatinga	SEArA	875	580	19.2	27.8	39.79	14.97	18.91	2.19	2.77	5.33	2.77	14.56	13.81	21.1	10.53	4.05	3.53	Adult	M	Indeterminate	-7.45825	-36.4809	0.092	22.092	Chrom1	Deme5
WLSV902	PB	Cariri	Aw	Caatinga	SEArA	875	580	19.2	27.8	53.86	19.76	23.78	3.58	3.6	6.8	3.14	22.28	18.62	29.36	13.54	5.84	4.1	Adult	F	Mature	-7.45825	-36.4809	0.191	17.372	Chrom2	Deme5
WLSV901	PB	Cariri	Aw	Caatinga	SEArA	875	580	19.2	27.8	39.08	14.76	18.04	2.42	3.15	4.93	3.06	15.09	14.11	22.22	9.83	4.05	3.32	Adult	M	Indeterminate	-7.45825	-36.4809	0.079	10.297	Chrom6	Deme5
WLSV885	PB	Cariri	Aw	Caatinga	SEArA	875	580	19.2	27.8	41.73	15.39	19.96	1.99	2.87	6.05	3	16.99	15.36	24.71	10.28	4.26	3.37	Adult	M	Indeterminate	-7.45825	-36.4809	0.105	12.405	Chrom1	Deme5
WLSV244	PB	Cariri	Aw	Caatinga	SEArA	875	580	19.2	27.8	45.58	17.54	20.98	2.44	3.44	6.55	2.7	17.95	15.39	25.58	10.34	4.36	3.63	Adult	M	Indeterminate	-7.45825	-36.4809	0.161	18.131	Chrom2	Deme5
WLSV904	PB	Cariri	Aw	Caatinga	SEArA	875	580	19.2	27.8	37.02	13.59	16.09	2.09	2.71	4.55	2.74	14.51	13.2	23.76	9.94	3.63	2.29	Adult	M	Indeterminate	-7.45825	-36.4809	0.346	19.982	Chrom6	Deme5
WLSV965	PB	Cariri	Aw	Caatinga	SEArA	875	580	19.2	27.8	35.63	13.62	17.84	2.03	3.09	4.78	3.13	15.5	14.16	23.08	9.09	3.03	2.66	Adult	F	Indeterminate	-7.45825	-36.4809	0.15	14.961	Chrom2	Deme5
WLSV899	PB	Cariri	Aw	Caatinga	SEArA	875	580	19.2	27.8	41.05	14.81	18.87	2.35	2.71	5.42	2.81	16.13	14.06	22.22	9.84	3.58	3.77	Adult	M	Indeterminate	-7.45825	-36.4809	0.2	21.228	Chrom2	Deme5
GGS560	PI	Confusoes	Aw	Caatinga	SEArA	1093.4	604	20.7	32.6	22.3	9.12	8.57	1.6	1.57	3.4	2.15	9.29	9	11.74	4.76	1.93	2.22	Juvenile	M	Immature	-9.223	-43.4898	0.033	16.427	Chrom5	Deme3
GGS608	PI	Confusoes	Aw	Caatinga	SEArA	1093.4	604	20.7	32.6	22.84	10.21	9.28	2.59	2.39	3.33	2.29	9.62	9.02	11.78	4.69	1.96	2.31	Juvenile	F	Immature	-9.223	-43.4898	0.027	14.206	Chrom2	Deme3
GGS656	PI	Confusoes	Aw	Caatinga	SEArA	1093.4	604	20.7	32.6	29.59	11.69	11.65	2.53	3.29	3.58	3.02	7.61	8.02	14.04	6.08	2.53	2.89	Subadult	F	Indeterminate	-9.223	-43.4898	0.03	12.714	Chrom2	Deme3
GGS657	PI	Confusoes	Aw	Caatinga	SEArA	1093.4	604	20.7	32.6	23.16	9.57	9.45	1.71	2.41	2.43	2.34	7.73	8.45	11.15	5.23	1.8	2.05	Juvenile	M	Immature	-9.223	-43.4898	0.057	20.782	Chrom2	Deme3
GGS658	PI	Confusoes	Aw	Caatinga	SEArA	1093.4	604	20.7	32.6	29.07	11.36	12.61	2.08	2.76	3.94	2.8	8.73	10.41	14.78	6.88	2.98	2.52	Subadult	M	Indeterminate	-9.223	-43.4898	0.077	14.001	Chrom2	Deme3
GGS673	PI	Confusoes	Aw	Caatinga	SEArA	1093.4	604	20.7	32.6	48.2	17.8	21.14	3.59	4.17	6.28	4.1	20.04	16.69	27.54	12.97	4.55	3.75	Adult	M	Indeterminate	-9.223	-43.4898	0.069	23.516	Chrom1	Deme3
GGS674	PI	Confusoes	Aw	Caatinga	SEArA	1093.4	604	20.7	32.6	33.06	13.64	14.85	2.14	2.82	4.15	2.73	11.17	12.4	17.76	7.33	3.092	3.07	Subadult	F	Indeterminate	-9.223	-43.4898	0.016	18.385	Chrom2	Deme3
CHUFPB22176	PI	Confusoes	Aw	Caatinga	SEArA	1093.4	662	20.7	32.6	41.72	16.25	18.97	2.38	3.17	5.38	2.72	17.69	15.14	23.4	9.14	3.99	4	Adult	M	Mature	-9.223	-43.4898	0.087	13.884	Chrom2	Deme3
CHUFPB22227	PI	Confusoes	Aw	Caatinga	SEArA	1093.4	662	20.7	32.6	46.28	15.54	20.63	2.47	2.94	5.69	3.84	18.5	15.66	25.45	15.27	4.11	4.22	Adult	M	Mature	-9.223	-43.4898	0.031	8.443	Chrom2	Deme3
CHUFPB22193	PI	Confusoes	Aw	Caatinga	SEArA	1093.4	662	20.7	32.6	48.91	20.14	22.08	2.66	3.95	6.34	4.18	19.91	17.3	28.74	10.84	4.57	4.61	Adult	M	Mature	-9.223	-43.4898	0.084	10.125	Chrom2	Deme3
CHUFPB22221	PI	Confusoes	Aw	Caatinga	SEArA	1093.4	662	20.7	32.6	40.1	17.35	17.48	2.31	2.98	4.57	3.48	16.57	13.82	21.76	8.94	3.27	3.91	Adult	M	Indeterminate	-9.223	-43.4898	0.175	7.022	Chrom3	Deme3
CHUFPB22215	PI	Confusoes	Aw	Caatinga	SEArA	1093.4	662	20.7	32.6	39.47	14.41	17.86	1.94	3.28	5.56	3.68	17.1	14.46	23.66	9.95	3.97	3.81	Adult	M	Mature	-9.223	-43.4898	0.079	18.653	Chrom1	Deme3
CHUFPB22219	PI	Confusoes	Aw	Caatinga	SEArA	1093.4	662	20.7	32.6	57.99	20.59	26.61	3.99	4.61	6.69	5.25	22.51	21.58	34.67	15.08	6.07	5.25	Adult	F	Indeterminate	-9.223	-43.4898	0.089	13.199	Chrom5	Deme3
CHUFPB19973	PI	Confusoes	Aw	Caatinga	SEArA	1093.4	662	20.7	32.6	37.24	16.32	17.73	2.79	3.02	5.71	3.49	17.05	14.38	22.34	9.43	4.01	3.33	Adult	M	Indeterminate	-9.223	-43.4898	0.153	24.195	Chrom6	Deme3
CHUFPB20878	PI	Confusoes	Aw	Caatinga	SEArA	1093.4	662	20.7	32.6	29.22	10.87	13.52	2.26	2.17	4.59	3.17	14.12	11.42	18.21	7.11	3.05	2.97	Subadult	M	Indeterminate	-9.223	-43.4898	0.028	7.093	Chrom3	Deme3
CHUFPB19986	PI	Confusoes	Aw	Caatinga	SEArA	1093.4	662	20.7	32.6	31.29	13.49	12.99	2.22	2.19	3.84	2.88	13	11.27	16.01	7.5	2.76	2.96	Subadult	M	Indeterminate	-9.223	-43.4898	0.075	13.957	Chrom3	Deme3
UFPB11265	PB	Cordeiros	Aw	Caatinga	SEArA	875	580	19.2	27.8	19.77	7.11	7.82	1.31	1.36	2.51	1.55	6.32	6.21	10.24	4.34	1.56	1.92	Juvenile	M	Immature	-7.4675	-36.8433	0.029	7.894	Chrom2	Deme2
UFPB11263	PB	Cordeiros	Aw	Caatinga	SEArA	875	580	19.2	27.8	17.24	6.91	7.1	1.03	1.27	2.36	1.44	5.82	5.79	9.57	4.22	1.52	1.75	Juvenile	M	Immature	-7.4675	-36.8433	0.057	11.073	Chrom2	Deme2
UFPB11262	PB	Cordeiros	Aw	Caatinga	SEArA	875	580	19.2	27.8	18.28	7.76	7.72	1.4	1.51	3.18	1.38	5.99	5.89	8.19	3.49	1.01	2.29	Juvenile	F	Immature	-7.4675	-36.8433	0.012	2.973	Chrom5	Deme2
UFPB11254	PB	Cordeiros	Aw	Caatinga	SEArA	875	580	19.2	27.8	19.21	7.93	8.73	1.17	1.42	2.43	1.52	6.85	5.74	10.65	4.69	1.6	2.06	Juvenile	M	Immature	-7.4675	-36.8433	0.026	15.374	Chrom2	Deme2
UFPB11258	PB	Cordeiros	Aw	Caatinga	SEArA	875	580	19.2	27.8	18.3	7.08	7.77	1.15	1.39	2.36	0.8	6.67	5.98	9.97	4.07	1.66	1.93	Juvenile	F	Immature	-7.4675	-36.8433	0.041	10.231	Chrom4	Deme2
UFPB11255	PB	Cordeiros	Aw	Caatinga	SEArA	875	580	19.2	27.8	18.34	6.73	7.41	0.83	1.15	2.73	1.61	5.32	6.05	9.17	4.11	1.6	1.86	Juvenile	M	Immature	-7.4675	-36.8433	0.04	15.827	Chrom2	Deme2
UFPB11256	PB	Cordeiros	Aw	Caatinga	SEArA	875	580	19.2	27.8	18.87	6.89	7.22	0.92	1.33	2.7	1.74	7.16	5.79	10.22	4.49	1.9	1.49	Juvenile	F	Immature	-7.4675	-36.8433	0.008	18.283	Chrom2	Deme2
UFPB11257	PB	Cordeiros	Aw	Caatinga	SEArA	875	580	19.2	27.8	19.29	7.2	7.96	0.81	2.24	2.46	1.56	8.28	7.73	9.56	4.26	1.66	1.31	Juvenile	M	Immature	-7.4675	-36.8433	0.047	21.916	Chrom1	Deme2
UFPB11259	PB	Cordeiros	Aw	Caatinga	SEArA	875	580	19.2	27.8	17.65	7.89	7.72	0.9	1.15	2.58	1.39	5.43	5.28	8.55	3.7	1.69	1.58	Juvenile	M	Immature	-7.4675	-36.8433	0.043	9.895	Chrom2	Deme2
UFPB11264	PB	Cordeiros	Aw	Caatinga	SEArA	875	580	19.2	27.8	19.1	7.25	8.41	0.85	1.77	3.05	1.96	7.25	6.77	9.5	4.71	1.67	1.79	Juvenile	F	Immature	-7.4675	-36.8433	0.042	7.55	Chrom2	Deme2
UFPB11261	PB	Cordeiros	Aw	Caatinga	SEArA	875	580	19.2	27.8	18.21	7.21	8.13	1.04	1.25	2.56	1.43	7.24	6.55	10.09	5.29	2.04	1.77	Juvenile	F	Immature	-7.4675	-36.8433	0.055	21.1	Chrom1	Deme2
UFPB5866	PB	Cordeiros	Aw	Caatinga	SEArA	875	580	19.2	27.8	39.12	15.53	18.08	2.36	3.13	4.71	3.06	15.68	14.78	23.96	9.28	4.21	3.08	Adult	F	Mature	-7.4675	-36.8433	0.057	22.325	Chrom2	Deme2
UFPB11260	PB	Cordeiros	Aw	Caatinga	SEArA	875	580	19.2	27.8	16.9	7.42	7.97	1.03	1.28	1.73	1.47	6.62	5.21	9.15	4.27	1.42	1.96	Juvenile	M	Immature	-7.4675	-36.8433	0.105	6.991	Chrom2	Deme2
UFPB11253	PB	Cordeiros	Aw	Caatinga	SEArA	875	580	19.2	27.8	19.87	8.2	9.08	0.89	1.48	2.4	1.29	7.17	5.57	10.35	4.11	1.83	2.01	Juvenile	F	Immature	-7.4675	-36.8433	0.059	15.905	Chrom1	Deme2
z48	PB	Cordeiros	Aw	Caatinga	SEArA	875	580	19.2	27.8	18.34	6.73	7.41	0.83	1.15	2.73	1.61	5.32	6.05	9.17	4.11	1.6	1.86	Juvenile	M	Immature	-7.4675	-36.8433	0.04	15.827	Chrom2	Deme2
CHUFPB20690	CE	Crato	BSh	Caatingaúmida	AreTenSFE	1075.8	466	20.5	31.6	26.99	11.03	12.97	1.65	2.48	4.15	2.23	11.8	10.82	16.57	7.56	2.88	2.55	Subadult	F	Indeterminate	-7.22996	-39.4123	0.016	9.678	Chrom2	Deme2
CHUFPB19690	CE	Crato	BSh	Caatingaúmida	AreTenSFE	1075.8	466	20.5	31.6	18.72	7.57	8.32	1.72	1.81	3.03	2.05	7.62	7.22	10.63	4.47	1.57	2.24	Juvenile	F	Immature	-7.22996	-39.4123	0.015	6.615	Chrom2	Deme2
UFPB1585	PB	Desterro	Bwh	Caatinga	SEArA	995.5	297	20.9	32.9	24.15	9.85	10.3	2.26	2.94	4.39	2.63	9.97	8.88	13.84	5.48	3.67	3.1	Juvenile	M	Immature	-6.87528	-37.5321	0.028	12.631	Chrom5	Deme3
UFPB1586	PB	Desterro	Bwh	Caatinga	SEArA	995.5	297	20.9	32.9	25.23	9.87	10.68	2.37	2.67	3.95	2.38	10.28	8.77	14.33	7.21	3.04	2.7	Subadult	M	Indeterminate	-6.87528	-37.5321	0.082	23.299	Chrom5	Deme3
UFPB1584	PB	Desterro	Bwh	Caatinga	SEArA	995.5	297	20.9	32.9	22.33	9.59	10.05	1.5	1.97	3.57	2.34	7.75	6.17	13.12	5.86	2.94	2.31	Juvenile	M	Immature	-6.87528	-37.5321	0.029	8.321	Chrom2	Deme3
UFPB1583	PB	Desterro	Bwh	Caatinga	SEArA	995.5	297	20.9	32.9	22.66	9.45	9.95	1.13	1.59	3.88	1.8	8.96	8.47	11.17	6.37	2.04	1.87	Juvenile	F	Immature	-6.87528	-37.5321	0.153	23.327	Chrom6	Deme3
UFPB1582	PB	Desterro	Bwh	Caatinga	SEArA	995.5	297	20.9	32.9	24.93	10.34	10.86	1.79	2.12	3.83	2.33	9.49	8.72	14.2	5.67	2.73	2.68	Juvenile	M	Immature	-6.87528	-37.5321	0.035	15.796	Chrom5	Deme3
z69	PB	Desterro	Bwh	Caatinga	SEArA	995.5	297	20.9	32.9	24.16	9.85	10.31	2.26	2.94	4.39	2.62	9.96	8.87	13.84	5.47	3.67	3.1	Juvenile	M	Immature	-6.87528	-37.5321	0.028	12.631	Chrom5	Deme3
z70	PB	Desterro	Bwh	Caatinga	SEArA	995.5	297	20.9	32.9	24.15	9.84	10.3	2.27	2.93	4.38	2.63	9.97	8.88	13.83	5.48	3.67	3.1	Juvenile	M	Immature	-6.87528	-37.5321	0.028	12.631	Chrom5	Deme3
z71	PB	Desterro	Bwh	Caatinga	SEArA	995.5	297	20.9	32.9	24.15	9.85	10.29	2.26	2.94	4.39	2.63	9.97	8.87	13.82	5.48	3.66	3.09	Juvenile	M	Immature	-6.87528	-37.5321	0.028	12.631	Chrom5	Deme3
UFPB7208	PE	Exu	Aw	Caatinga	Ca	704.7	156	21.9	33.2	36.86	15.57	13.42	2.89	2.99	4.71	3.02	14.5	12.59	21.11	8.63	3.7	3.23	Adult	F	Mature	-7.51194	-39.7239	0.134	17.795	Chrom6	Deme3
UFPB7211	PE	Exu	BSh	Caatinga	Ca	1075.8	523	20.5	31.6	33.11	13.56	15.05	1.82	2.61	3.71	2.9	12.96	12.04	19.16	7.64	3.47	2.73	Subadult	F	Indeterminate	-7.51194	-39.7239	0.238	27.827	Chrom6	Deme3
UFPB7210	PE	Exu	BSh	Caatinga	Ca	1075.8	523	20.5	31.6	30.8	11.71	13.12	2.12	2.91	3.9	2.16	12.47	10.27	17.55	6.54	2.64	2.76	Subadult	F	Indeterminate	-7.51194	-39.7239	0.386	30.778	Chrom2	Deme3
UFPB7217	PE	Exu	BSh	Caatinga	Ca	1075.8	523	20.5	31.6	41.51	17.25	14.81	2.4	3.48	5.43	3.7	15.87	14	21.6	7.67	4.01	3.36	Adult	F	Indeterminate	-7.51194	-39.7239	0.259	15.977	Chrom2	Deme3
UFPB7212	PE	Exu	BSh	Caatinga	Ca	1075.8	523	20.5	31.6	35.46	16.39	13.61	2.07	2.59	4.26	2.9	14.28	12.53	19.94	8.28	3.81	2.69	Adult	F	Indeterminate	-7.51194	-39.7239	0.292	23.449	Chrom6	Deme3
UFPB7213	PE	Exu	BSh	Caatinga	Ca	1075.8	523	20.5	31.6	33.79	14.75	12.96	2.32	3.04	4.67	2.63	13.41	11.66	19.62	7.17	3.59	2.81	Subadult	F	Indeterminate	-7.51194	-39.7239	0.427	23.369	Chrom6	Deme3
UFPB7209	PE	Exu	BSh	Caatinga	Ca	1075.8	523	20.5	31.6	33.745	13.415	14.27	2.135	2.33	4.105	2.97	14.07	11.775	19.16	7.42	3.45	2.8	Subadult	F	Mature	-7.51194	-39.7239	0.089	26.86	Chrom1	Deme3
UFPB7216	PE	Exu	BSh	Caatinga	Ca	1075.8	523	20.5	31.6	37.92	14.23	16.98	2.26	2.85	5.14	2.56	14.44	12.53	20.5	8.09	3.74	3.55	Adult	M	Mature	-7.51194	-39.7239	0.07	22.043	Chrom2	Deme3
UFPB7214	PE	Exu	BSh	Caatinga	Ca	1075.8	523	20.5	31.6	48	18.58	21.37	2.93	3.65	6.94	3.4	19.16	17.31	28.03	11.24	5	4.18	Adult	M	Indeterminate	-7.51194	-39.7239	0.21	33.001	Chrom2	Deme3
UFPB6127	CE	Ipu	BSh	Caatinga	AreT	995.6	636	22.4	33.5	29.32	11.8	13.74	1.6	2.42	4.31	2.53	12.48	11.19	17.35	6.08	3.21	2.28	Subadult	M	Indeterminate	-4.32194	-40.7108	0.148	22.357	Chrom1	Deme5
z79	PE	Exu	BSh	Caatinga	Ca	1075.8	523	20.5	31.6	33.8	14.75	12.98	2.33	3.06	4.68	2.64	13.41	11.67	19.62	7.18	3.59	2.82	Subadult	F	Indeterminate	-7.51194	-39.7239	0.427	23.369	Chrom6	Deme3
z80	PE	Exu	BSh	Caatinga	Ca	1075.8	523	20.5	31.6	33.79	14.75	12.96	2.32	3.04	4.67	2.63	13.41	11.66	19.62	7.17	3.59	2.81	Subadult	F	Indeterminate	-7.51194	-39.7239	0.427	23.369	Chrom6	Deme3
z81	PE	Exu	BSh	Caatinga	Ca	1075.8	523	20.5	31.6	33.79	14.75	12.96	2.32	3.03	4.67	2.62	13.41	11.67	19.63	7.17	3.6	2.81	Subadult	F	Indeterminate	-7.51194	-39.7239	0.427	23.369	Chrom6	Deme3
z82	PE	Exu	BSh	Caatinga	Ca	1075.8	523	20.5	31.6	35.46	16.39	13.6	2.07	2.59	4.26	2.9	14.28	12.53	19.94	8.28	3.81	2.69	Adult	F	Indeterminate	-7.51194	-39.7239	0.292	23.449	Chrom6	Deme3
z83	PE	Exu	BSh	Caatinga	Ca	1075.8	523	20.5	31.6	35.46	16.4	13.61	2.08	2.59	4.27	2.9	14.29	12.52	19.95	8.29	3.81	2.69	Adult	F	Indeterminate	-7.51194	-39.7239	0.292	23.449	Chrom6	Deme3
z84	PE	Exu	BSh	Caatinga	Ca	1075.8	523	20.5	31.6	35.46	16.39	13.61	2.07	2.59	4.26	2.9	14.28	12.53	19.94	8.28	3.82	2.69	Adult	F	Indeterminate	-7.51194	-39.7239	0.292	23.449	Chrom6	Deme3
z85	PE	Exu	Aw	Caatinga	Ca	1075.8	156	21.9	33.2	36.86	15.57	13.42	2.89	2.99	4.71	3.02	14.51	12.59	21.11	8.62	3.7	3.23	Adult	F	Mature	-7.51194	-39.7239	0.134	17.795	Chrom6	Deme3
z86	PE	Exu	Aw	Caatinga	Ca	1075.8	156	21.9	33.2	36.86	15.57	13.41	2.89	2.99	4.7	3.03	14.5	12.61	21.12	8.63	3.71	3.23	Adult	F	Mature	-7.51194	-39.7239	0.134	17.795	Chrom6	Deme3
z87	PE	Exu	BSh	Caatinga	Ca	1075.8	523	20.5	31.6	37.92	14.23	16.98	2.26	2.85	5.14	2.56	14.44	12.53	20.5	8.09	3.74	3.55	Adult	M	Mature	-7.51194	-39.7239	0.07	22.043	Chrom2	Deme3
z88	PE	Exu	BSh	Caatinga	Ca	1075.8	523	20.5	31.6	33.11	13.56	15.05	1.82	2.61	3.71	2.9	12.96	12.04	19.16	7.64	3.47	2.73	Subadult	F	Indeterminate	-7.51194	-39.7239	0.238	27.827	Chrom6	Deme3
z89	PE	Exu	BSh	Caatinga	Ca	1075.8	523	20.5	31.6	33.745	13.415	14.27	2.145	2.33	4.115	2.97	14.07	11.785	19.15	7.412	3.44	2.8	Subadult	F	Mature	-7.51194	-39.7239	0.089	26.86	Chrom1	Deme3
z90	PE	Exu	BSh	Caatinga	Ca	1075.8	523	20.5	31.6	33.745	13.425	14.26	2.135	2.32	4.105	2.97	14.07	11.775	19.16	7.42	3.45	2.8	Subadult	F	Mature	-7.51194	-39.7239	0.089	26.86	Chrom1	Deme3
CHUFPB20657	CE	Jaguaribe	BSh	Caatinga	SEArA	1079.2	125	22.2	32.8	37.23	13.51	16.64	2.34	2.36	5.28	3.39	15.18	13.66	22.01	8.43	3.16	3.37	Adult	M	Mature	-5.90103	-38.6221	0.02	7.572	Chrom1	Deme5
CHUFPB20656	CE	Jaguaribe	BSh	Caatinga	SEArA	1079.2	125	22.2	32.8	42.49	14.81	17.1	2.65	3.02	4.76	3.65	15.7	14.8	23.2	9.78	3.96	3.64	Adult	M	Indeterminate	-5.90103	-38.6221	0.071	11.869	Chrom6	Deme5
CHUFPB20675	CE	Jaguaribe	BSh	Caatinga	SEArA	1079.2	125	22.2	32.8	44.52	13.02	17.73	2.37	3.25	4.38	4.01	18.65	15.67	24.35	10.1	3.79	3.94	Adult	M	Mature	-5.90103	-38.6221	0.12	19.533	Chrom2	Deme5
CHUFPB22195	CE	Jaguaribe	BSh	Caatinga	SEArA	1079.2	125	22.2	32.8	48.35	17.18	20.62	2.91	3.28	5.57	4.38	18.79	16.66	23.55	11.16	4.68	4.21	Adult	M	Mature	-5.90103	-38.6221	0.053	12.606	Chrom5	Deme5
CHUFPB22233	CE	Jaguaribe	BSh	Caatinga	SEArA	1079.2	125	22.2	32.8	41.21	15.88	19.08	2.5	3.1	5.1	3.65	16.6	14.67	23.33	9.49	3.82	3.74	Adult	M	Indeterminate	-5.90103	-38.6221	0.067	9.003	Chrom5	Deme5
CHUFPB22183	CE	Jaguaribe	BSh	Caatinga	SEArA	1079.2	125	22.2	32.8	41.95	13.8	16.95	2.84	3.28	4.72	3.14	14.99	13.19	21.5	9.71	3.41	3.63	Adult	M	Indeterminate	-5.90103	-38.6221	0.105	19.295	Chrom2	Deme5
CHUFPB22188	CE	Jaguaribe	BSh	Caatinga	SEArA	1079.2	125	22.2	32.8	41.1	13.99	16.46	2.68	2.57	5.16	3.52	15.87	13.72	22.95	8.87	3.73	3.88	Adult	M	Mature	-5.90103	-38.6221	0.109	14.096	Chrom4	Deme5
CHUFPB21058	CE	Jaguaribe	BSh	Caatinga	SEFDA	1079.2	125	22.2	32.8	44.07	13.87	16.46	2.13	2.81	5.33	3.28	15.72	13.79	22.2	9.52	3.47	3.64	Adult	M	Mature	-5.90103	-38.6221	0.053	22.376	Chrom2	Deme5
CHUFPB20940	CE	Jaguaribe	BSh	Caatinga	SEArA	1079.2	125	22.2	32.8	48.16	20.63	19	2.55	2.52	6.52	4.1	18.51	16.24	24.64	10.64	4.23	3.85	Adult	M	Mature	-5.90103	-38.6221	0.032	14.457	Chrom2	Deme5
CHUFPB19946	CE	Jaguaribe	BSh	Caatinga	SEArA	1079.2	125	22.2	32.8	44.71	15.31	18.79	2.35	2.98	5.23	3.64	16.65	14.8	24.36	9.95	4.06	4.09	Adult	M	Indeterminate	-5.90103	-38.6221	0.094	13.805	Chrom2	Deme5
z91	CE	Jaguaribe	BSh	Caatinga	SEArA	1079.2	125	22.2	32.8	42.49	14.8	17.1	2.65	3.02	4.76	3.65	15.7	14.8	23.2	9.78	3.96	3.64	Adult	M	Indeterminate	-5.90103	-38.6221	0.071	11.869	Chrom6	Deme5
z92	CE	Jaguaribe	BSh	Caatinga	SEArA	1079.2	125	22.2	32.8	42.5	14.81	17.1	2.65	3.02	4.76	3.65	15.7	14.8	23.2	9.78	3.96	3.64	Adult	M	Indeterminate	-5.90103	-38.6221	0.071	11.869	Chrom6	Deme5
z93	CE	Jaguaribe	BSh	Caatinga	SEArA	1079.2	125	22.2	32.8	42.49	14.81	17.1	2.65	3.02	4.76	3.65	15.7	14.8	23.2	9.78	3.96	3.64	Adult	M	Indeterminate	-5.90103	-38.6221	0.071	11.869	Chrom6	Deme5
z94	CE	Jaguaribe	BSh	Caatinga	SEFDA	1079.2	125	22.2	32.8	44.07	13.87	16.47	2.13	2.81	5.33	3.28	15.72	13.79	22.2	9.52	3.47	3.64	Adult	M	Mature	-5.90103	-38.6221	0.053	22.376	Chrom2	Deme5
z95	CE	Jaguaribe	BSh	Caatinga	SEFDA	1079.2	125	22.2	32.8	44.06	13.85	16.46	2.14	2.81	5.33	3.28	15.72	13.8	22.21	9.52	3.47	3.64	Adult	M	Mature	-5.90103	-38.6221	0.053	22.376	Chrom2	Deme5
z96	CE	Jaguaribe	BSh	Caatinga	SEFDA	1079.2	125	22.2	32.8	44.07	13.87	16.45	2.13	2.81	5.33	3.29	15.72	13.79	22.2	9.52	3.47	3.65	Adult	M	Mature	-5.90103	-38.6221	0.053	22.376	Chrom2	Deme5
z97	CE	Jaguaribe	BSh	Caatinga	SEArA	1079.2	125	22.2	32.8	44.52	13.02	17.73	2.37	3.25	4.38	4.01	18.65	15.67	24.35	10.1	3.79	3.94	Adult	M	Mature	-5.90103	-38.6221	0.12	19.533	Chrom2	Deme5
z98	CE	Jaguaribe	BSh	Caatinga	SEArA	1079.2	125	22.2	32.8	44.52	13.02	17.73	2.37	3.25	4.38	4.01	18.65	15.67	24.35	10.1	3.79	3.94	Adult	M	Mature	-5.90103	-38.6221	0.12	19.533	Chrom2	Deme5
z99	CE	Jaguaribe	BSh	Caatinga	SEArA	1079.2	125	22.2	32.8	44.71	15.31	18.79	2.35	2.98	5.23	3.64	16.65	14.8	24.36	9.95	4.06	4.09	Adult	M	Indeterminate	-5.90103	-38.6221	0.094	13.805	Chrom2	Deme5
z100	CE	Jaguaribe	BSh	Caatinga	SEArA	1079.2	125	22.2	32.8	48.16	20.63	19	2.55	2.52	6.52	4.1	18.51	16.24	24.64	10.64	4.23	3.85	Adult	M	Mature	-5.90103	-38.6221	0.032	14.457	Chrom2	Deme5
z101	CE	Jaguaribe	BSh	Caatinga	SEArA	1079.2	125	22.2	32.8	41.95	13.8	16.95	2.84	3.28	4.72	3.14	14.99	13.19	21.5	9.71	3.41	3.63	Adult	M	Indeterminate	-5.90103	-38.6221	0.105	19.295	Chrom2	Deme5
z102	CE	Jaguaribe	BSh	Caatinga	SEArA	1079.2	125	22.2	32.8	41.95	13.8	16.95	2.83	3.27	4.71	3.14	14.99	13.18	21.5	9.7	3.4	3.63	Adult	M	Indeterminate	-5.90103	-38.6221	0.105	19.295	Chrom2	Deme5
z103	CE	Jaguaribe	BSh	Caatinga	SEArA	1079.2	125	22.2	32.8	41.21	15.88	19.08	2.5	3.1	5.1	3.65	16.6	14.67	23.33	9.49	3.82	3.74	Adult	M	Indeterminate	-5.90103	-38.6221	0.067	9.003	Chrom5	Deme5
z104	CE	Jaguaribe	BSh	Caatinga	SEArA	1079.2	125	22.2	32.8	41.1	13.99	16.46	2.68	2.57	5.16	3.52	15.87	13.72	22.95	8.87	3.73	3.88	Adult	M	Mature	-5.90103	-38.6221	0.109	14.096	Chrom4	Deme5
GGS01	RN	Jcamara	Bwh	Caatinga	SEFDA	1343.8	214	21.6	30.2	63.08	21.21	26.93	3.72	5.46	6.31	6.2	20.25	21.29	33.62	15.3	6.07	4.92	Adult	F	Mature	-5.44972	-35.872	0.176	22.655	Chrom2	Deme4
GGS02	RN	Jcamara	Bwh	Caatinga	SEFDA	1343.8	214	21.6	30.2	42.53	15.34	18.4	3.36	3.64	5.18	3.66	15.42	15.42	21.85	10.73	3.95	3.21	Adult	F	Mature	-5.44972	-35.872	0.179	21.118	Chrom2	Deme4
GGS03	RN	Jcamara	Bwh	Caatinga	SEFDA	1343.8	214	21.6	30.2	34.55	13.18	15	2.35	2.55	4.28	2.91	13.61	12.34	18.6	8.32	3.26	2.72	Subadult	F	Mature	-5.44972	-35.872	0.117	16.859	Chrom2	Deme4
GGS04	RN	Jcamara	Bwh	Caatinga	SEFDA	1343.8	214	21.6	30.2	36.68	13.66	14.93	2.36	3	4.52	3.01	11.84	11.82	17.4	9.3	3.33	2.74	Adult	F	Mature	-5.44972	-35.872	0.143	29.346	Chrom1	Deme4
GGS05	RN	Jcamara	Bwh	Caatinga	SEFDA	1343.8	214	21.6	30.2	52.27	18.06	23.58	3.24	4.3	5.29	4.3	19.41	17.77	26.66	13.08	5.11	3.94	Adult	M	Indeterminate	-5.44972	-35.872	0.045	25.352	Chrom2	Deme4
GGS06	RN	Jcamara	Bwh	Caatinga	SEFDA	1343.8	214	21.6	30.2	33.73	13.13	13.47	2.26	3.03	4.5	3.36	10.2	13.78	18.06	7.98	3.12	2.78	Subadult	F	Indeterminate	-5.44972	-35.872	0.024	20.451	Chrom2	Deme4
GGS07	RN	Jcamara	Bwh	Caatinga	SEFDA	1343.8	214	21.6	30.2	34.94	14.21	15.3	2.6	2.94	4.49	2.63	12.88	14.03	19.07	9.02	2.19	3.12	Subadult	F	Indeterminate	-5.44972	-35.872	0.045	17.336	Chrom1	Deme4
GGS08	RN	Jcamara	Bwh	Caatinga	SEFDA	1343.8	214	21.6	30.2	29.51	13.05	13.54	2.18	3.12	3.61	2.73	13.16	11.96	17.24	7.99	2.7	2.77	Subadult	F	Indeterminate	-5.44972	-35.872	0.123	23.477	Chrom1	Deme4
GGS09	RN	Jcamara	Bwh	Caatinga	SEFDA	1343.8	214	21.6	30.2	37.43	14.75	15.98	2.65	2.84	4.84	3.1	13.76	14.11	21.53	10.49	2.97	3.23	Adult	F	Indeterminate	-5.44972	-35.872	0.953	24.267	Chrom4	Deme4
GGS10	RN	Jcamara	Bwh	Caatinga	SEFDA	1343.8	214	21.6	30.2	31.67	12.78	13.54	2.02	3.39	4.58	3.17	11.79	11.38	18.3	7.58	2.94	3.21	Subadult	M	Indeterminate	-5.44972	-35.872	0.358	26.673	Chrom4	Deme4
GGS100	RN	Jcamara	Bwh	Caatinga	SEFDA	1343.8	214	21.6	30.2	33.12	13.23	14.29	1.72	2.95	3.97	2.34	13.2	12.13	18.62	7.87	2.96	2.69	Subadult	M	Mature	-5.44972	-35.872	0.117	28.636	Chrom2	Deme4
GGS101	RN	Jcamara	Bwh	Caatinga	SEFDA	1343.8	214	21.6	30.2	39.18	15.75	17.9	2.37	3.54	5.17	2.91	15.98	15.5	20.95	9.73	3.93	3.42	Adult	M	Mature	-5.44972	-35.872	0.136	17.368	Chrom4	Deme4
GGS102	RN	Jcamara	Bwh	Caatinga	SEFDA	1343.8	214	21.6	30.2	51.32	17.68	22.5	2.62	3.89	5.79	3.39	18.95	18.04	26.61	12.8	4.34	3.89	Adult	F	Mature	-5.44972	-35.872	0.104	30.804	Chrom2	Deme4
GGS103	RN	Jcamara	Bwh	Caatinga	SEFDA	1343.8	214	21.6	30.2	46.12	16.5	19.12	2.54	3.7	4.36	3.05	18.74	16.37	26.4	10.33	4.01	3.1	Adult	M	Mature	-5.44972	-35.872	0.075	21.544	Chrom6	Deme4
GGS104	RN	Jcamara	Bwh	Caatinga	SEFDA	1343.8	214	21.6	30.2	45.5	16.8	19.58	2.47	4.07	5.64	3.56	17.58	16.43	25.06	10.93	4	3.74	Adult	F	Mature	-5.44972	-35.872	0.063	26.896	Chrom2	Deme4
GGS105	RN	Jcamara	Bwh	Caatinga	SEFDA	1343.8	214	21.6	30.2	44.68	16.33	19.81	2.77	3.79	5.35	2.99	16.88	16.92	24.67	10.95	4.57	3.36	Adult	M	Mature	-5.44972	-35.872	0.057	22.228	Chrom3	Deme4
GGS106	RN	Jcamara	Bwh	Caatinga	SEFDA	1343.8	214	21.6	30.2	46.61	18.31	20.05	2.49	4.19	5.05	3.2	19.7	18.34	25.59	11.18	4.39	3.51	Adult	F	Mature	-5.44972	-35.872	0.057	30.153	Chrom1	Deme4
GGS107	RN	Jcamara	Bwh	Caatinga	SEFDA	1343.8	214	21.6	30.2	34.82	14.02	14.86	1.96	3.29	3.86	2.47	11.96	11.89	18.59	8.08	3.03	2.99	Subadult	M	Indeterminate	-5.44972	-35.872	0.102	18.888	Chrom6	Deme4
GGS108	RN	Jcamara	Bwh	Caatinga	SEFDA	1343.8	214	21.6	30.2	36.53	14.9	15.83	2.33	3.22	5.14	2.22	16.38	15.74	22.7	8.75	3.39	3.05	Adult	M	Indeterminate	-5.44972	-35.872	0.034	13.186	Chrom6	Deme4
GGS109	RN	Jcamara	Bwh	Caatinga	SEFDA	1343.8	214	21.6	30.2	44.63	18.07	19.17	2.89	4.16	5.49	2.68	18.27	17.6	25.08	11.45	4.04	3.78	Adult	F	Mature	-5.44972	-35.872	0.041	20.748	Chrom2	Deme4
GGS11	RN	Jcamara	Bwh	Caatinga	SEFDA	1343.8	214	21.6	30.2	36.34	14.75	16.41	2.76	2.99	4.89	2.83	13.53	14.48	19.4	8.56	3.57	2.83	Adult	M	Mature	-5.44972	-35.872	0.25	26.237	Chrom6	Deme4
GGS110	RN	Jcamara	Bwh	Caatinga	SEFDA	1343.8	214	21.6	30.2	34.2	14.46	15.6	2.25	2.74	4.14	2.53	13.39	11.5	18.56	7.82	3.03	2.9	Subadult	F	Indeterminate	-5.44972	-35.872	0.124	19.962	Chrom4	Deme4
GGS111	RN	Jcamara	Bwh	Caatinga	SEFDA	1343.8	214	21.6	30.2	48.68	19.61	20.31	2.48	3.89	5.12	3.09	18.27	17.62	24.76	11.08	4.13	3.9	Adult	F	Mature	-5.44972	-35.872	0.052	26.576	Chrom2	Deme4
GGS112	RN	Jcamara	Bwh	Caatinga	SEFDA	1343.8	214	21.6	30.2	35.01	14.79	15.62	1.91	2.89	3.95	2.53	13.24	12.29	19.88	8.66	3.28	2.92	Adult	M	Mature	-5.44972	-35.872	0.038	21.344	Chrom2	Deme4
GGS113	RN	Jcamara	Bwh	Caatinga	SEFDA	1343.8	214	21.6	30.2	34.43	12.83	14.2	1.78	2.88	3.73	2.29	12.4	12.03	19.65	8.57	3.36	2.63	Subadult	M	Mature	-5.44972	-35.872	0.023	16.534	Chrom5	Deme4
GGS114	RN	Jcamara	Bwh	Caatinga	SEFDA	1343.8	214	21.6	30.2	45.54	15.35	18.85	2.19	3.71	4.56	3.05	17.26	16.91	25.21	11.46	3.8	3.36	Adult	M	Mature	-5.44972	-35.872	0.072	19.894	Chrom2	Deme4
GGS115	RN	Jcamara	Bwh	Caatinga	SEFDA	1343.8	214	21.6	30.2	40.5	15.12	18.07	2.01	3.34	4.82	2.87	16.69	14.93	22.03	9.52	3.74	3.3	Adult	M	Mature	-5.44972	-35.872	0.103	20.318	Chrom3	Deme4
GGS116	RN	Jcamara	Bwh	Caatinga	SEFDA	1343.8	214	21.6	30.2	51.55	18.41	22.46	3.05	4.55	5.48	3.57	21.24	19.77	28.16	12.75	4.63	3.94	Adult	F	Mature	-5.44972	-35.872	0.208	26.519	Chrom1	Deme4
GGS117	RN	Jcamara	Bwh	Caatinga	SEFDA	1343.8	214	21.6	30.2	32.9	12.42	13.15	1.99	2.44	3.84	2.55	12.67	11.84	18.35	7.63	2.64	2.6	Subadult	F	Indeterminate	-5.44972	-35.872	0.074	22.326	Chrom1	Deme4
GGS118	RN	Jcamara	Bwh	Caatinga	SEFDA	1343.8	214	21.6	30.2	48.25	17.89	21.20	2.53	3.7	5.38	3.35	20.57	18.52	27.81	12.94	5.08	4.16	Adult	F	Mature	-5.44972	-35.872	0.1	20.716	Chrom6	Deme4
GGS119	RN	Jcamara	Bwh	Caatinga	SEFDA	1343.8	214	21.6	30.2	33.54	13.06	14.75	1.79	2.7	3.96	1.93	13.7	12.46	19.78	7.92	3.48	2.91	Subadult	M	Mature	-5.44972	-35.872	0.11	27.157	Chrom1	Deme4
GGS12	RN	Jcamara	Bwh	Caatinga	SEFDA	1343.8	214	21.6	30.2	55.71	18.26	22.74	3.6	4.46	6.26	5.22	19.4	18.87	28.07	12.77	5.38	4.71	Adult	M	Mature	-5.44972	-35.872	0.555	26.149	Chrom2	Deme4
GGS120	RN	Jcamara	Bwh	Caatinga	SEFDA	1343.8	214	21.6	30.2	46.11	16.51	20.81	2.92	3.49	5.6	2.74	18.86	16.45	26.07	11.53	4.35	3.99	Adult	F	Mature	-5.44972	-35.872	0.174	28.708	Chrom2	Deme4
GGS121	RN	Jcamara	Bwh	Caatinga	SEFDA	1343.8	214	21.6	30.2	41.12	14.18	16.56	2.1	3.31	3.84	2.35	15.65	13.84	22.45	9.84	4	2.89	Adult	M	Indeterminate	-5.44972	-35.872	0.135	29.536	Chrom3	Deme4
GGS122	RN	Jcamara	Bwh	Caatinga	SEFDA	1343.8	214	21.6	30.2	48.25	17.44	20	2.99	4.1	5.15	2.35	20.62	18.34	28.12	11.44	4.81	3.8	Adult	F	Mature	-5.44972	-35.872	0.038	21.344	Chrom2	Deme4
GGS13	RN	Jcamara	Bwh	Caatinga	SEFDA	1343.8	214	21.6	30.2	26.36	10.87	11.45	1.65	2.56	4	1.97	9.22	9.86	13.79	6.34	2.59	2.31	Subadult	F	Indeterminate	-5.44972	-35.872	0.364	21.349	Chrom4	Deme4
GGS14	RN	Jcamara	Bwh	Caatinga	SEFDA	1343.8	214	21.6	30.2	32.18	13.13	14.19	2.45	3.15	4.25	2.69	12.12	12.18	16.56	8.35	2.91	2.68	Subadult	M	Indeterminate	-5.44972	-35.872	0.213	25.898	Chrom2	Deme4
GGS15	RN	Jcamara	Bwh	Caatinga	SEFDA	1343.8	214	21.6	30.2	48.34	18.72	21.86	3.34	4.68	6.78	3.66	18.28	18.02	26.37	11.65	4.68	4.04	Adult	F	Mature	-5.44972	-35.872	0.291	22.642	Chrom2	Deme4
GGS16	RN	Jcamara	Bwh	Caatinga	SEFDA	1343.8	214	21.6	30.2	38.62	15.21	13.87	2.06	3.29	4.88	3.06	10.49	12.76	19.22	8.96	3.07	2.75	Adult	M	Indeterminate	-5.44972	-35.872	0.186	17.904	Chrom1	Deme4
GGS17	RN	Jcamara	Bwh	Caatinga	SEFDA	1343.8	214	21.6	30.2	39.98	15.45	17.17	2.79	3.6	5.27	2.92	13.74	14.51	19.93	9.91	3.78	3.45	Adult	F	Indeterminate	-5.44972	-35.872	0.209	21.928	Chrom4	Deme4
GGS18	RN	Jcamara	Bwh	Caatinga	SEFDA	1343.8	214	21.6	30.2	32.26	12.87	13.54	2.63	3.24	4.57	3.07	11.32	11.71	17.97	8.91	3.15	2.94	Subadult	F	Indeterminate	-5.44972	-35.872	0.43	21.4	Chrom2	Deme4
GGS19	RN	Jcamara	Bwh	Caatinga	SEFDA	1343.8	214	21.6	30.2	36.95	13.33	14.95	2.7	3.76	4.22	3.16	13.02	11.78	18.94	8.62	3.39	3.31	Adult	M	Mature	-5.44972	-35.872	0.016	21.858	Chrom1	Deme4
GGS20	RN	Jcamara	Bwh	Caatinga	SEFDA	1343.8	214	21.6	30.2	29.52	11.3	12.19	2.19	2.65	2.65	4.39	2.76	9.51	9.89	14.26	6.75	2.93	Subadult	F	Indeterminate	-5.44972	-35.872	0.119	17.907	Chrom6	Deme4
GGS21	RN	Jcamara	Bwh	Caatinga	SEFDA	1343.8	214	21.6	30.2	52.57	18.1	24.88	3.3	4.31	5.87	3.63	20.51	18.36	26.24	12.42	4.61	3.85	Adult	M	Indeterminate	-5.44972	-35.872	0.119	17.907	Chrom1	Deme4
GGS22	RN	Jcamara	Bwh	Caatinga	SEFDA	1343.8	214	21.6	30.2	39.06	15.33	17.82	3.04	3.79	5.03	3.3	14.05	14.33	20.12	11.16	3.55	3.45	Adult	F	Mature	-5.44972	-35.872	0.281	29.335	Chrom2	Deme4
GGS23	RN	Jcamara	Bwh	Caatinga	SEFDA	1343.8	214	21.6	30.2	50.83	18.16	21.71	3.65	3.8	5.05	4.45	18.01	17.52	27.96	11.63	5.22	3.7	Adult	F	Indeterminate	-5.44972	-35.872	0.989	28.835	Chrom4	Deme4
GGS24	RN	Jcamara	Bwh	Caatinga	SEFDA	1343.8	214	21.6	30.2	37.95	14.48	14.92	2.16	3	5.17	3.1	11.95	12.47	18.13	8.41	3.62	3.3	Adult	F	Mature	-5.44972	-35.872	0.134	25.958	Chrom2	Deme4
GGS25	RN	Jcamara	Bwh	Caatinga	SEFDA	1343.8	214	21.6	30.2	51.28	17.812	22.53	3.01	4.26	5.83	3.62	20.13	18.1	26.63	10.94	4.59	4.29	Adult	F	Mature	-5.44972	-35.872	0.154	22.676	Chrom2	Deme4
GGS26	RN	Jcamara	Bwh	Caatinga	SEFDA	1343.8	214	21.6	30.2	48.89	18.92	22.37	3.63	3.83	6.04	4.62	19.12	19.06	27.56	14.4	5.16	4.46	Adult	M	Mature	-5.44972	-35.872	0.192	15.563	Chrom5	Deme4
GGS27	RN	Jcamara	Bwh	Caatinga	SEFDA	1343.8	214	21.6	30.2	32.32	12.61	13.04	2.63	3.21	4.76	3.16	14.23	12.02	16.17	9.06	3.36	3	Subadult	M	Mature	-5.44972	-35.872	0.322	27.596	Chrom2	Deme4
GGS28	RN	Jcamara	Bwh	Caatinga	SEFDA	1343.8	214	21.6	30.2	43.5	17.79	22.17	3.39	4.14	5.76	4.11	18.44	17.38	25.21	10.91	3.95	3.97	Adult	F	Indeterminate	-5.44972	-35.872	0.565	20.983	Chrom1	Deme4
GGS29	RN	Jcamara	Bwh	Caatinga	SEFDA	1343.8	214	21.6	30.2	35.15	12.14	14.22	2.34	3.29	4.76	3.21	12.49	13.87	18.58	8.07	3.16	2.84	Adult	M	Indeterminate	-5.44972	-35.872	0.339	25.117	Chrom4	Deme4
GGS30	RN	Jcamara	Bwh	Caatinga	SEFDA	1343.8	214	21.6	30.2	41.94	18.17	22.04	3.44	4.05	5.22	3.94	17.63	16.53	23.59	10.12	4.03	4.1	Adult	F	Mature	-5.44972	-35.872	0.241	17.67	Chrom4	Deme4
GGS31	RN	Jcamara	Bwh	Caatinga	SEFDA	1343.8	214	21.6	30.2	21.19	9.58	9.07	1.74	2.37	2.93	2.16	7.87	8.45	10.4	5.68	2.1	2.37	Juvenile	F	Immature	-5.44972	-35.872	0.657	18.904	Chrom2	Deme4
CHUFPB22224	RN	Jcamara	Bwh	Caatinga	SEFDA	1343.8	140	21.6	30.2	27.57	12.95	13.09	2.13	1.9	4.39	2.72	11.15	10.34	16.85	6.75	2.7	3.08	Subadult	F	Indeterminate	-5.53371	-35.8143	0.07	17.627	Chrom6	Deme4
CHUFPB21860	RN	Jcamara	Bwh	Caatinga	SEFDA	1343.8	140	21.6	30.2	51.67	11.16	21.44	3.19	3.37	5.77	4.41	19.37	16.52	25.96	10.99	4.72	4.75	Adult	M	Mature	-5.53371	-35.8143	0.147	21.2	Chrom4	Deme4
CHUFPB21300	RN	Jcamara	Bwh	Caatinga	SEFDA	1343.8	140	21.6	30.2	54.03	18.16	22.88	3.24	3.54	6.07	4.24	23.01	17.49	26.9	11.33	4.63	4.41	Adult	M	Mature	-5.53371	-35.8143	0.08	16.216	Chrom6	Deme4
CHUFPB21844	RN	Jcamara	Bwh	Caatinga	SEFDA	1343.8	140	21.6	30.2	46.07	17.01	19.85	2.93	2.86	6.63	4.35	20.28	16.5	27.12	10.51	4.43	4.48	Adult	M	Mature	-5.53371	-35.8143	0.16	30.061	Chrom6	Deme4
CHUFPB23174	RN	Jcamara	Bwh	Caatinga	SEFDA	1343.8	140	21.6	30.2	45.25	17.92	22.26	2.98	3.11	7.17	3.34	18.2	17.22	27.63	11.24	4.24	4.55	Adult	M	Indeterminate	-5.53371	-35.8143	0.1	24.753	Chrom6	Deme4
CHUFPB20872	RN	Jcamara	Bwh	Caatinga	SEFDA	1343.8	140	21.6	30.2	25.89	10.66	12.79	2.09	2.44	4.7	2.84	10.39	10.38	16.65	8.45	2.88	2.58	Subadult	M	Indeterminate	-5.53371	-35.8143	0.068	10.5	Chrom2	Deme4
CHUFPB19900	RN	Jcamara	Bwh	Caatinga	SEFDA	1343.8	140	21.6	30.2	34.71	12.75	14.71	2.59	2.08	5.58	2.99	14.01	12.68	20.23	8.79	3.48	3.67	Subadult	F	Mature	-5.53371	-35.8143	0.187	28.669	Chrom2	Deme4
CHUFPB19984	RN	Jcamara	Bwh	Caatinga	SEFDA	1343.8	140	21.6	30.2	34.68	12.33	16.16	2.49	2.43	4.69	3.05	14.58	13.79	20.59	8.93	3.25	3.14	Subadult	M	Mature	-5.53371	-35.8143	0.045	16.1	Chrom2	Deme4
CHUFPB21884	RN	Jcamara	Bwh	Caatinga	SEFDA	1343.8	140	21.6	30.2	47.01	17.36	21.37	3.17	3.19	6.39	3.96	17.9	16.62	24.8	11.07	4.88	4.39	Adult	M	Mature	-5.53371	-35.8143	0.169	23.563	Chrom6	Deme4
UFPB10033	CE	Junco	BSh	Caatinga	SEArA	1726.8	214	17.5	25.2	31.31	12.76	13.92	1.57	2.46	3.84	2.39	12.81	11.28	18.02	7.28	2.79	2.72	Subadult	F	Mature	-4.81433	-38.9861	0.047	26.125	Chrom2	Deme2
UFPB10035	CE	Junco	BSh	Caatinga	SEArA	1726.8	214	17.5	25.2	33.76	11.82	13.31	1.67	2.35	3.53	2.35	10.8	10.43	17.07	7.25	3.02	2.8	Subadult	M	Indeterminate	-4.81433	-38.9861	0.079	17.672	Chrom2	Deme2
UFPB10034	CE	Junco	BSh	Caatinga	SEArA	1726.8	214	17.5	25.2	25.91	9.7	10.03	1.47	1.77	3.75	2.38	9.22	8.61	13.8	4.95	2.84	2.56	Subadult	F	Indeterminate	-4.81433	-38.9861	0.048	13.08	Chrom1	Deme2
UFPB10037	CE	Junco	BSh	Caatinga	SEArA	1726.8	214	17.5	25.2	25.43	10.45	12.41	1.36	1.79	2.85	2.18	9.94	9.13	14.42	5.79	2.75	2.06	Subadult	M	Indeterminate	-4.81433	-38.9861	0.063	25.976	Chrom2	Deme2
UFPB10036	CE	Junco	BSh	Caatinga	SEArA	1726.8	214	17.5	25.2	22.2	9.45	9.7	1.68	2.06	3.6	1.83	7.81	8.86	12.16	5.34	3.01	2.02	Juvenile	F	Immature	-4.81433	-38.9861	0.392	29.491	Chrom6	Deme2
z109	CE	Junco	BSh	Caatinga	SEArA	1726.8	214	17.5	25.2	31.32	12.76	13.91	1.57	2.45	3.83	2.39	12.81	11.28	18.02	7.28	2.79	2.72	Subadult	F	Mature	-4.81433	-38.9861	0.047	26.125	Chrom2	Deme2
z110	CE	Junco	BSh	Caatinga	SEArA	1726.8	214	17.5	25.2	31.31	12.75	13.92	1.57	2.46	3.845	2.4	12.8	11.27	18.01	7.29	2.78	2.71	Subadult	F	Mature	-4.81433	-38.9861	0.047	26.125	Chrom2	Deme2
z111	CE	Junco	BSh	Caatinga	SEArA	1726.8	214	17.5	25.2	31.31	12.76	13.92	1.57	2.46	3.84	2.39	12.81	11.28	18.02	7.28	2.79	2.72	Subadult	F	Mature	-4.81433	-38.9861	0.047	26.125	Chrom2	Deme2
CHUFPB20679	RN	Macaíba	Aw	Caatinga	AreIU	1343.8	48	22.5	29.3	32.39	9.55	12.94	2.11	2.05	4.41	2.41	11.68	11.37	16.56	6.95	3.15	3.3	Subadult	M	Mature	-5.86288	-35.3553	0.077	14.783	Chrom4	Deme1
CHUFPB20684	RN	Macaíba	Aw	Caatinga	AreIU	1343.8	48	22.5	29.3	32.04	9.55	13.19	1.92	2.33	4.53	2.62	11.82	11.57	18.51	7.68	3.02	3.15	Subadult	M	Mature	-5.86288	-35.3553	0.074	14.789	Chrom2	Deme1
CHUFPB21063	RN	Macaíba	Aw	Caatinga	AreIU	1343.8	48	22.5	29.3	54.88	17.73	22.51	3.59	3.33	7.21	4.57	20.91	17.57	28.67	9.36	4.73	5.09	Adult	F	Indeterminate	-5.86288	-35.3553	0.048	18.138	Chrom4	Deme1
CHUFPB21348	RN	Macaíba	Aw	Caatinga	AreIU	1343.8	48	22.5	29.3	40.51	15.3	16.29	2.69	2.71	5.7	3.26	15.27	13.49	23.04	8.09	3.2	4.18	Adult	F	Mature	-5.86288	-35.3553	0.06	9.85	Chrom2	Deme1
CHUFPB20682	RN	Macaíba	Aw	Caatinga	AreIU	1343.8	48	22.5	29.3	36.97	12.31	14.65	1.64	2.96	4.96	3.3	13.06	12.85	20.01	7.52	3.16	3.89	Adult	F	Indeterminate	-5.86288	-35.3553	0.09	18.386	Chrom2	Deme1
CHUFPB19976	RN	Macaíba	Aw	Caatinga	AreIU	1343.8	466	22.5	29.3	46.62	17.14	20.07	2.88	3.16	5.15	3.62	17.87	16.7	25.18	11.17	4.83	4	Adult	M	Mature	-5.86288	-35.3553	0.045	16.415	Chrom4	Deme1
CHUFPB20864	RN	Macaíba	Aw	Caatinga	AreIU	1343.8	466	22.5	29.3	47.09	15.66	18.04	3.85	2.98	4.91	3.44	19.06	16.25	26.1	10.62	4.76	3.9	Adult	M	Mature	-5.86288	-35.3553	0.069	23.253	Chrom4	Deme1
CHUFPB19948	RN	Macaíba	Aw	Caatinga	AreIU	1343.8	466	22.5	29.3	51.79	18.52	21.84	3.33	3.5	5.36	4.1	21.09	18.41	29.36	12.37	4.4	4.38	Adult	F	Mature	-5.86288	-35.3553	0.053	17.991	Chrom2	Deme1
CHUFPB20834	RN	Macaíba	Aw	Caatinga	AreIU	1343.8	466	22.5	29.3	28.77	11.24	12.35	1.88	2.93	4.59	2.74	11.87	10.48	16.15	6.31	3.11	2.75	Subadult	F	Indeterminate	-5.86288	-35.3553	0.096	22.23	Chrom6	Deme1
CHUFPB19974	RN	Macaíba	Aw	Caatinga	AreIU	1343.8	466	22.5	29.3	34.81	14.47	14.87	2.24	3.14	4.21	3.18	13.01	12.38	16.04	7.82	3.24	3.62	Subadult	F	Indeterminate	-5.86288	-35.3553	0.027	13.04	Chrom5	Deme1
CHUFPB20900	RN	Macaíba	Aw	Caatinga	AreIU	1343.8	466	22.5	29.3	38.75	14.76	16.84	2.86	2.71	4.93	3.29	15.03	13.58	22.06	9.82	3.78	4	Adult	M	Indeterminate	-5.86288	-35.3553	0.063	24.957	Chrom4	Deme1
CHUFPB19966	RN	Macaíba	Aw	Caatinga	AreIU	1343.8	466	22.5	29.3	48.25	15.82	19.33	2.55	3.58	5.98	3.34	16.72	15.77	23.85	10.99	4.61	4.21	Adult	M	Mature	-5.86288	-35.3553	0.047	16.031	Chrom4	Deme1
CHUFPB19953	RN	Macaíba	Aw	Caatinga	AreIU	1343.8	466	22.5	29.3	46.24	46.24	16.29	18.53	2.86	2.77	6.24	3.74	16.48	21.71	9.8	3.87	3.65	Adult	M	Mature	-5.86288	-35.3553	0.091	34.906	Chrom6	Deme1
CHUFPB19949	RN	Macaíba	Aw	Caatinga	AreIU	1343.8	466	22.5	29.3	53.76	21.33	21.86	3.34	3.72	6.06	4.41	18.57	18.15	27.77	11.57	5.31	4.82	Adult	F	Mature	-5.86288	-35.3553	0.084	15.378	Chrom6	Deme1
CHUFPB20790	RN	Macaíba	Aw	Caatinga	AreIU	1343.8	466	22.5	29.3	52.42	17.27	20.73	3.32	3.53	6.08	4.13	18.58	17.69	28.79	9.59	5.3	4.5	Adult	F	Indeterminate	-5.86288	-35.3553	0.097	22.765	Chrom2	Deme1
CHUFPB19847	RN	Macaíba	Aw	Caatinga	AreIU	1343.8	466	22.5	29.3	47.42	19.39	19.7	3.01	2.97	6.65	4.1	18.46	16.15	26.12	10.77	4.26	4.2	Adult	M	Indeterminate	-5.86288	-35.3553	0.1	24.309	Chrom6	Deme1
CHUFPB20858	RN	Macaíba	Aw	Caatinga	AreIU	1343.8	466	22.5	29.3	42.6	15.1	16.87	2.51	2.15	5.24	3.42	15.65	14.53	24.44	9.93	3.61	4.09	Adult	M	Mature	-5.86288	-35.3553	0.039	20.115	Chrom4	Deme1
CHUFPB20842	RN	Macaíba	Aw	Caatinga	AreIU	1343.8	466	22.5	29.3	32.36	13.67	13.5	2.13	2.67	4.65	3.01	11.35	12.41	17.95	7.32	2.52	2.9	Subadult	M	Indeterminate	-5.86288	-35.3553	0.076	17.405	Chrom2	Deme1
CHUFPB19972	RN	Macaíba	Aw	Caatinga	AreIU	1343.8	466	22.5	29.3	40.12	15.75	17.67	2.56	3.49	4.88	3.67	16.13	15.25	22.04	9.67	4.37	3.74	Adult	M	Mature	-5.86288	-35.3553	0.111	18.386	Chrom2	Deme1
CHUFPB19961	RN	Macaíba	Aw	Caatinga	AreIU	1343.8	466	22.5	29.3	42.56	15.81	19.02	3.28	3.71	5.63	3.65	17.68	16.48	24.73	9.85	3.85	4.44	Adult	M	Indeterminate	-5.86288	-35.3553	0.088	11.641	Chrom2	Deme1
CHUFPB19980	RN	Macaíba	Aw	Caatinga	AreIU	1343.8	466	22.5	29.3	37.82	13.48	15.51	2.34	3.05	4.67	3.07	13.77	12.41	19.45	8.77	3.95	3.71	Adult	M	Indeterminate	-5.86288	-35.3553	0.058	16.611	Chrom4	Deme1
CHUFPB19995	RN	Macaíba	Aw	Caatinga	AreIU	1343.8	466	22.5	29.3	50.08	17.61	18.61	2.6	3.51	5.81	3.58	18.17	16.57	26.95	11.8	3.74	4.04	Adult	F	Indeterminate	-5.86288	-35.3553	0.068	20.458	Chrom4	Deme1
CHUFPB20848	RN	Macaíba	Aw	Caatinga	AreIU	1343.8	466	22.5	29.3	48.42	15.03	17.85	2.59	3.04	5.37	4.64	17.3	16.24	26.86	10.67	4.4	4.66	Adult	F	Mature	-5.86288	-35.3553	0.069	18.11	Chrom2	Deme1
CHUFPB20866	RN	Macaíba	Aw	Caatinga	AreIU	1343.8	466	22.5	29.3	42.12	15.03	18.14	2.79	3.73	4.98	2.75	14.45	14.52	23.26	11.41	4.27	3.78	Adult	M	Mature	-5.86288	-35.3553	0.193	21.03	Chrom2	Deme1
CHUFPB20802	RN	Macaíba	Aw	Caatinga	AreIU	1343.8	466	22.5	29.3	47.71	17.44	20.22	2.88	3.18	5.68	3.71	18.1	16.12	24.93	15.39	4.31	4.27	Adult	M	Indeterminate	-5.86288	-35.3553	0.101	18.603	Chrom3	Deme1
CHUFPB20869	RN	Macaíba	Aw	Caatinga	AreIU	1343.8	466	22.5	29.3	38.77	17.6	17.78	2.67	2.28	5.21	3.21	15.06	14.2	21.61	9.27	4.04	3.8	Adult	M	Indeterminate	-5.86288	-35.3553	0.123	15.813	Chrom1	Deme1
CHUFPB20883	RN	Macaíba	Aw	Caatinga	AreIU	1343.8	466	22.5	29.3	40.92	15.68	19.36	2.66	2.82	5.8	3.9	18.5	15.6	21.02	9.45	4.19	3.84	Adult	M	Indeterminate	-5.86288	-35.3553	0.088	21.222	Chrom2	Deme1
CHUFPB20874	RN	Macaíba	Aw	Caatinga	AreIU	1343.8	466	22.5	29.3	42.87	17.01	18.45	2.59	3.54	5.77	3.45	17.22	15.78	24.92	11.34	4.06	3.34	Adult	M	Mature	-5.86288	-35.3553	0.068	21.399	Chrom6	Deme1
CHUFPB20903	RN	Macaíba	Aw	Caatinga	AreIU	1343.8	466	22.5	29.3	46.48	19.11	2.97	2.81	4.37	6.24	3.47	19.03	16.16	24.56	11.53	4.19	4.06	Adult	M	Indeterminate	-5.86288	-35.3553	0.105	21.289	Chrom4	Deme1
UFPB9671	PE	Nascente	BSh	Caatinga	SEArA	599.5	536	21.3	31.7	21.66	8.11	9.14	1.34	1.58	2.79	2.62	8.75	8.47	12.6	5.62	1.93	1.79	Juvenile	M	Immature	-7.88324	-40.4707	0.153	17.626	Chrom2	Deme2
UFPB9670	PE	Nascente	BSh	Caatinga	SEArA	599.5	536	21.3	31.7	43.3	16.93	17.95	2.26	3.77	5.6	3.47	14.56	13.6	22.35	9.13	4.39	3.1	Adult	M	Mature	-7.88324	-40.4707	0.089	20.953	Chrom1	Deme2
UFPB12124	BA	Pafonso	BSh	Caatinga	AreIU	609.6	200	21.1	31.9	36.54	15.17	16.64	2.4	2.99	4.92	3.35	13.82	12.98	19.99	8.07	3.15	3.13	Adult	F	Indeterminate	-9.40113	-38.2062	0.238	25.052	Chrom2	Deme3
UFPB12114	BA	Pafonso	BSh	Caatinga	AreIU	609.6	200	21.1	31.9	37.68	14.84	17.31	2.23	2.71	5.32	3.48	13.75	13.09	21.14	8.3	3.56	3.05	Adult	F	Mature	-9.40113	-38.2062	0.13	20.071	Chrom4	Deme3
UFPB12112	BA	Pafonso	BSh	Caatinga	AreIU	609.6	200	21.1	31.9	38.28	17.93	15.1	2.26	2.93	5.07	3.63	16.7	15.12	23.44	9.43	3.89	3.06	Adult	M	Indeterminate	-9.40113	-38.2062	0.1	15.203	Chrom4	Deme3
UFPB12116	BA	Pafonso	BSh	Caatinga	AreIU	609.6	200	21.1	31.9	32.67	14.02	15.17	2.3	3.45	5.01	3.85	13.48	12.98	20.79	8.88	3.54	2.91	Subadult	F	Indeterminate	-9.40113	-38.2062	0.127	22.557	Chrom6	Deme3
UFPB12115	BA	Pafonso	BSh	Caatinga	AreIU	609.6	200	21.1	31.9	29.45	11.73	15.63	2.07	1.93	3.5	3.1	12.32	12.17	18.48	8.7	3.03	2.59	Subadult	M	Indeterminate	-9.40113	-38.2062	0.248	22.824	Chrom6	Deme3
UFPB12118	BA	Pafonso	BSh	Caatinga	AreIU	609.6	200	21.1	31.9	34.57	14.99	16.68	3.22	2.99	4.36	3.16	14.52	12.02	21.14	8.5	3.76	3.2	Subadult	F	Indeterminate	-9.40113	-38.2062	0.079	23.333	Chrom4	Deme3
z146	BA	Pafonso	BSh	Caatinga	AreIU	609.6	200	21.1	31.9	37.68	14.84	17.31	2.23	2.71	5.32	3.48	13.75	13.09	21.14	8.3	3.56	3.05	Adult	F	Mature	-9.40113	-38.2062	0.13	20.071	Chrom4	Deme3
z147	BA	Pafonso	BSh	Caatinga	AreIU	609.6	200	21.1	31.9	36.54	15.17	16.64	2.4	2.99	4.92	3.35	13.82	12.98	19.99	8.07	3.15	3.13	Adult	F	Indeterminate	-9.40113	-38.2062	0.238	25.052	Chrom2	Deme3
z148	BA	Pafonso	BSh	Caatinga	AreIU	609.6	200	21.1	31.9	36.54	15.18	16.65	2.41	2.99	4.93	3.356	13.825	12.989	19.998	8.078	3.155	3.135	Adult	F	Indeterminate	-9.40113	-38.2062	0.238	25.052	Chrom2	Deme3
z149	BA	Pafonso	BSh	Caatinga	AreIU	609.6	200	21.1	31.9	34.57	14.99	16.68	3.22	2.99	4.36	3.16	14.52	12.02	21.14	8.5	3.76	3.2	Subadult	F	Indeterminate	-9.40113	-38.2062	0.079	23.333	Chrom4	Deme3
KSV031	PB	Patos	Aw	Caatinga	SEArA	999.5	258	20.9	32.9	34.9	12.49	13.98	1.74	2.83	4.04	1.59	13.87	11.63	19.26	7.45	3.18	3.22	Subadult	M	Indeterminate	-6.98602	-37.317	0.046	24.305	Chrom2	Deme2
KSV041	PB	Patos	Aw	Caatinga	SEArA	999.5	258	20.9	32.9	43.93	15.79	16.55	2.06	3.19	5.66	2.49	15.53	14.38	21.5	9.59	4.43	3.09	Adult	M	Mature	-6.98602	-37.317	0.186	19.698	Chrom6	Deme2
KSV053	PB	Patos	Aw	Caatinga	SEArA	999.5	258	20.9	32.9	41.34	14.92	17.12	2.19	3.28	4.89	2.49	14.67	14.32	21.29	9	4.32	3.09	Adult	M	Mature	-6.98602	-37.317	0.251	19.824	Chrom6	Deme2
KSV055	PB	Patos	Aw	Caatinga	SEArA	999.5	258	20.9	32.9	44.63	15.87	18.66	2.31	3.68	5.47	2.6	15.45	15.99	23.1	9.77	3.81	3.36	Adult	M	Indeterminate	-6.98602	-37.317	0.172	23.424	Chrom3	Deme2
KSV079	PB	Patos	Aw	Caatinga	SEArA	999.5	258	20.9	32.9	41.98	16.63	19.92	2.2	3.52	4.95	2.55	16.66	15.84	22.27	9.07	4.13	3.57	Adult	F	Indeterminate	-6.98602	-37.317	0.254	19.863	Chrom4	Deme2
KSV113	PB	Patos	Aw	Caatinga	SEArA	999.5	258	20.9	32.9	44.36	15.64	17.63	2.08	3.22	4.45	2.54	15.74	14.69	23.27	9.42	3.87	3.28	Adult	F	Mature	-6.98602	-37.317	0.071	19.564	Chrom6	Deme2
KSV196	PB	Patos	Aw	Caatinga	SEArA	999.5	258	20.9	32.9	54.97	20.36	23.04	3.88	4.32	6.91	2.96	19.31	18.08	26.94	11.67	5.14	4.25	Adult	F	Mature	-6.98602	-37.317	0.182	13.758	Chrom6	Deme2
KSV237	PB	Patos	Aw	Caatinga	SEArA	999.5	258	20.9	32.9	44.06	17.03	18.96	2.44	4.2	4.82	2.98	16.77	16.11	23.42	10.63	4.43	3.78	Adult	F	Mature	-6.98602	-37.317	0.162	19.458	Chrom5	Deme2
KSV232	PB	Patos	Aw	Caatinga	SEArA	999.5	258	20.9	32.9	39.33	14.09	16.88	2.05	3.42	4.83	2.45	16.1	14.17	21.07	9.2	3.58	3.17	Adult	M	Mature	-6.98602	-37.317	0.077	5.29	Chrom5	Deme2
KSV233	PB	Patos	Aw	Caatinga	SEArA	999.5	258	20.9	32.9	41.48	15.91	18.66	2.47	3.1	4.92	2.24	16.59	16.18	22.85	10.55	4.45	3.38	Adult	F	Mature	-6.98602	-37.317	0.671	31.371	Chrom6	Deme2
KSV246	PB	Patos	Aw	Caatinga	SEArA	999.5	258	20.9	32.9	45.72	18.24	20.42	2.82	3.53	5.43	3.3	18.75	17.8	25	11.81	4.32	4.01	Adult	F	Mature	-6.98602	-37.317	0.083	7.994	Chrom6	Deme2
KSV247	PB	Patos	Aw	Caatinga	SEArA	999.5	258	20.9	32.9	43.23	16.05	19.43	2.44	3.36	5.01	2.09	16.6	14.78	23.09	9.58	4.3	3.42	Adult	F	Mature	-6.98602	-37.317	0.097	12.795	Chrom2	Deme2
KSV248	PB	Patos	Aw	Caatinga	SEArA	999.5	258	20.9	32.9	55.42	20.4	22.26	3.76	3.89	7.02	3.15	18.5	19	26.66	11.8	5.19	4.13	Adult	F	Mature	-6.98602	-37.317	0.252	24.972	Chrom2	Deme2
KSV251	PB	Patos	Aw	Caatinga	SEArA	999.5	258	20.9	32.9	19.95	8.34	8.14	1.21	1.89	2.48	1.75	7.85	7.44	9.47	4.61	1.77	1.42	Juvenile	M	Immature	-6.98602	-37.317	0.055	20.718	Chrom4	Deme2
KSV266	PB	Patos	Aw	Caatinga	SEArA	999.5	258	20.9	32.9	41.57	14.63	16.57	2.35	3.24	4.78	2.29	14.26	14.59	21.21	8.05	4.02	3.03	Adult	F	Indeterminate	-6.98602	-37.317	0.098	15.297	Chrom2	Deme2
KSV278	PB	Patos	Aw	Caatinga	SEArA	999.5	258	20.9	32.9	43.41	16.02	18.92	2.35	3.58	4.96	2.25	15.77	15.8	22.84	9.72	4.37	3.47	Adult	F	Mature	-6.98602	-37.317	0.056	11.508	Chrom5	Deme2
KSV313	PB	Patos	Aw	Caatinga	SEArA	999.5	258	20.9	32.9	43.12	15.01	16.74	2.43	3.01	5.15	2.61	15.63	14.16	21.67	9.01	4	3.34	Adult	F	Indeterminate	-6.98602	-37.317	0.362	15.703	Chrom6	Deme2
KSV319	PB	Patos	Aw	Caatinga	SEArA	999.5	258	20.9	32.9	40.23	14.48	16.66	2.19	3.03	4.9	2.08	15.46	14.14	20.77	8.92	4.11	3.17	Adult	M	Mature	-6.98602	-37.317	0.093	11.533	Chrom6	Deme2
KSV320	PB	Patos	Aw	Caatinga	SEArA	999.5	258	20.9	32.9	40.92	14.27	16.95	2.36	3.14	4.52	2.86	15.6	15.02	21.18	10.2	3.9	3.11	Adult	F	Mature	-6.98602	-37.317	0.196	14.115	Chrom3	Deme2
KSV321	PB	Patos	Aw	Caatinga	SEArA	999.5	258	20.9	32.9	41.78	15.75	17.35	2.53	3.56	4.67	2.71	14.01	15.26	22.14	9.31	3.71	3.05	Adult	M	Mature	-6.98602	-37.317	0.077	23.184	Chrom6	Deme2
KSV322	PB	Patos	Aw	Caatinga	SEArA	999.5	258	20.9	32.9	42.52	16.11	17.46	2.29	2.96	5.44	2.45	15.41	13.98	20.8	9.38	4.19	3.22	Adult	M	Mature	-6.98602	-37.317	0.113	32.521	Chrom1	Deme2
KSV325	PB	Patos	Aw	Caatinga	SEArA	999.5	258	20.9	32.9	45.27	16.51	18.77	2.34	3.79	4.82	2.48	15.64	14.48	24.31	9.56	4.35	3.38	Adult	F	Mature	-6.98602	-37.317	0.063	23.026	Chrom2	Deme2
KSV326	PB	Patos	Aw	Caatinga	SEArA	999.5	258	20.9	32.9	46.25	17.78	19.1	2.22	3.72	5.45	2.36	18.08	15.13	24.6	10.6	4.13	3.08	Adult	F	Mature	-6.98602	-37.317	0.207	16.745	Chrom2	Deme2
KSV327	PB	Patos	Aw	Caatinga	SEArA	999.5	258	20.9	32.9	51.22	18.34	21.73	2.63	3.89	5.06	2.76	18.73	17.7	26.86	11.42	5.02	4.11	Adult	F	Mature	-6.98602	-37.317	0.069	18.03	Chrom6	Deme2
KSV328	PB	Patos	Aw	Caatinga	SEArA	999.5	258	20.9	32.9	45.33	16.06	17.67	2.19	3.38	5.12	2.73	15.43	14.26	22.24	9.39	3.72	3.28	Adult	F	Mature	-6.98602	-37.317	0.093	16.458	Chrom1	Deme2
KSV330	PB	Patos	Aw	Caatinga	SEArA	999.5	258	20.9	32.9	42.07	17.05	16.53	2.45	3.57	4.77	2.69	15.2	14.98	22.56	9.83	4.16	3.27	Adult	M	Indeterminate	-6.98602	-37.317	0.378	27.493	Chrom2	Deme2
KSV346	PB	Patos	Aw	Caatinga	SEArA	999.5	258	20.9	32.9	39.06	14.21	17.07	2.22	3.18	4.62	2.17	15.38	14.38	21.82	9	3.41	3.36	Adult	M	Mature	-6.98602	-37.317	0.309	29.798	Chrom2	Deme2
UFPB9669	PI	Paulistana	Aw	Caatinga	SEArA	841.3	372	21.5	33.3	19.46	7.95	8.45	1.21	1.56	3.04	2.32	8.22	6.8	9.94	4.53	2.64	2.43	Juvenile	M	Immature	-8.1156	-41.2005	0.053	16.769	Chrom2	Deme5
UFPB8433	PB	PBoca	Aw	Caatinga	ArbAr	704.7	366	21.9	33.2	33.63	15.46	13.04	2.04	2.74	4.78	3	13.25	11.77	17.1	7.69	3.45	2.65	Subadult	M	Indeterminate	-6.45958	-35.6779	0.088	8.965	Chrom6	Deme1
UFPB8467	PB	PBoca	Aw	Caatinga	ArbAr	704.7	366	21.9	33.2	57.59	22.39	25.42	3.55	4.23	7	3.1	21.32	20.56	31.12	12.8	5.73	4.8	Adult	F	Indeterminate	-6.45958	-35.6779	0.339	22.097	Chrom2	Deme1
KSV012	PB	PBoca	Aw	Caatinga	ArbAr	704.7	366	21.9	33.2	16.3	7.02	7	1.4	1.4	2	1.96	6.76	6	8.85	3.84	1.35	1.5	Juvenile	M	Immature	-6.45958	-35.6779	0.0473466	13.1563		Deme1
YL005	PB	PBoca	Aw	Caatinga	ArbAr	704.7	366	21.9	33.2	9.8	3.98	3	0.95	1.15	1.4	0.8	3.54	4	5.65	2.136	0.85	1	Juvenile	M	Immature	-6.45958	-35.6779	0.0353163	12.0667		Deme1
YL013	PB	PBoca	Aw	Caatinga	ArbAr	704.7	366	21.9	33.2	11.2	4.55	4.4	1	1.15	1.85	0.91	4.05	4.35	6	2.44	1	1.15	Juvenile	M	Immature	-6.45958	-35.6779	0.0376181	12.2935		Deme1
YL101	PB	PBoca	Aw	Caatinga	ArbAr	704.7	366	21.9	33.2	28.65	11.36	12.45	2	1.8	3.9	2	11.61	11	15.35	6.6	2.35	2.85	Subadult		Indeterminate	-6.45958	-35.6779	0.0826389	15.5049		Deme1
YL117	PB	PBoca	Aw	Caatinga	ArbAr	704.7	366	21.9	33.2	47.45	20.42	23	3.15	4.45	5.75	3.15	21.38	18.4	26.2	12.35	4.4	4.3	Adult	F	Indeterminate	-6.45958	-35.6779	0.192936	19.9094		Deme1
YL135	PB	PBoca	Aw	Caatinga	ArbAr	704.7	366	21.9	33.2	23	9.38	19.65	1.7	2.2	2.75	2.17	9.57	18.85	12	5.35	2	2	Juvenile		Immature	-6.45958	-35.6779	0.0640501	14.3824		Deme1
YL144	PB	PBoca	Aw	Caatinga	ArbAr	704.7	366	21.9	33.2	13.55	5.98	5	0.85	0.8	1.85	0.76	5.82	5	7.55	3.47	1.45	1.15	Juvenile	F	Immature	-6.45958	-35.6779	0.041824	12.6838		Deme1
YL173	PB	PBoca	Aw	Caatinga	ArbAr	704.7	366	21.9	33.2	11.25	4.58	5.3	1.15	1.15	1.7	0.92	4.068	4.35	7	2.45	0.9	1.15	Juvenile	M	Immature	-6.45958	-35.6779	0.037703	12.3017		Deme1
YL238	PB	PBoca	Aw	Caatinga	ArbAr	704.7	366	21.9	33.2	56.75	21.11	23.75	3.8	4	6	3.07	22.14	21	31.2	12.55	6	4	Adult	F	Indeterminate	-6.45958	-35.6779	0.293474	22.5308		Deme1
YL280	PB	PBoca	Aw	Caatinga	ArbAr	704.7	366	21.9	33.2	17.8	6.28	5.4	1	1.15	2.3	1.96	7.15	4.5	6.85	3.92	1	1	Juvenile	M	Immature	-6.45958	-35.6779	0.0506604	13.4214		Deme1
YL283	PB	PBoca	Aw	Caatinga	ArbAr	704.7	366	21.9	33.2	10.75	4.4	5	1.85	0.75	2	0.88	3.88	4.35	5.15	2.34	1	1.2	Juvenile	F	Immature	-6.45958	-35.6779	0.0368623	12.2201		Deme1
YL293	PB	PBoca	Aw	Caatinga	ArbAr	704.7	366	21.9	33.2	56	21.89	29.6	3.15	3.35	6.6	3.79	21.47	21.3	32.65	12.94	5.7	5	Adult	F	Indeterminate	-6.45958	-35.6779	0.283713	22.3072		Deme1
YL325	PB	PBoca	Aw	Caatinga	ArbAr	704.7	366	21.9	33.2	15.65	6.55	6.75	1.45	1.15	2	1.98	7.09	5.95	10	3.18	1.45	1.4	Juvenile		Immature	-6.45958	-35.6779	0.0459788	13.043		Deme1
YL348	PB	PBoca	Aw	Caatinga	ArbAr	704.7	366	21.9	33.2	26.2	10.79	11.15	2.15	2.25	3.55	2.1	11.09	10.85	15.7	7.13	2.25	2.75	Subadult	F	Indeterminate	-6.45958	-35.6779	0.0739941	15.0078		Deme1
UFPB8448	PB	PBoca	Aw	Caatinga	ArbAr	704.7	366	21.9	33.2	15.65	6.51	6.41	1.06	1.13	2.32	1.93	6.69	5.03	8.97	3.05	1.37	1.45	Juvenile	M	Immature	-6.45958	-35.6779	0.066	10.292	Chrom4	Deme1
UFPB8441	PB	PBoca	Aw	Caatinga	ArbAr	704.7	366	21.9	33.2	30	12.2	11.24	1.33	2.23	3.32	2.45	10.85	10.1	14.67	6.54	2.45	2.63	Subadult	F	Indeterminate	-6.45958	-35.6779	0.081	14.508	Chrom2	Deme1
UFPB8485	PB	PBoca	Aw	Caatinga	ArbAr	704.7	366	21.9	33.2	15.84	6.87	6.58	1.16	1.59	2.52	1.98	7.13	5.82	8.89	3.67	1.69	1.49	Juvenile	M	Immature	-6.45958	-35.6779	0.02	3.693	Chrom6	Deme1
UFPB8480	PB	PBoca	Aw	Caatinga	ArbAr	704.7	366	21.9	33.2	17.2	7.03	8.04	0.96	1.61	2.76	1.36	6.73	5.49	9.71	3.45	1.51	1.67	Juvenile	M	Immature	-6.45958	-35.6779	0.087	16.873	Chrom6	Deme1
UFPB8435	PB	PBoca	Aw	Caatinga	ArbAr	704.7	366	21.9	33.2	34.08	15.48	14.44	2.29	2.83	3.32	3.62	14.22	13.8	20.12	7.16	3.53	2.96	Subadult	F	Mature	-6.45958	-35.6779	0.606	26.151	Chrom2	Deme1
UFPB8445	PB	PBoca	Aw	Caatinga	ArbAr	704.7	366	21.9	33.2	34.47	14.3	13.16	2.22	2.54	4.13	3.05	13.38	12.11	19.57	8.03	3.36	2.88	Subadult	M	Indeterminate	-6.45958	-35.6779	0.383	23.855	Chrom6	Deme1
UFPB8443	PB	PBoca	Aw	Caatinga	ArbAr	704.7	366	21.9	33.2	33.84	13.31	14.18	1.89	2.62	4.28	2.47	13.2	11.41	18.4	7.12	2.84	2.64	Subadult	M	Indeterminate	-6.45958	-35.6779	0.105	11.044	Chrom5	Deme1
UFPB8460	PB	PBoca	Aw	Caatinga	ArbAr	704.7	366	21.9	33.2	33.95	14.48	15.84	1.96	2.75	4.27	2.6	13.51	11.51	19.02	7.16	3	2.75	Subadult	M	Mature	-6.45958	-35.6779	0.126	24.362	Chrom6	Deme1
UFPB8423	PB	PBoca	Aw	Caatinga	ArbAr	704.7	366	21.9	33.2	16.53	7.24	7.61	1.3	1.66	2.77	2	6.28	5.76	9.68	3.78	2.06	2.01	Juvenile	M	Immature	-6.45958	-35.6779	0.026	8.299	Chrom1	Deme1
UFPB8424	PB	PBoca	Aw	Caatinga	ArbAr	704.7	366	21.9	33.2	22.3	9.82	10.91	1.33	1.86	3.52	2.77	8.41	7.37	13.67	6.27	2.24	1.58	Juvenile	F	Immature	-6.45958	-35.6779	0.105	7.352	Chrom6	Deme1
UFPB8477	PB	PBoca	Aw	Caatinga	ArbAr	704.7	366	21.9	33.2	36.53	14.96	18.81	1.98	3.12	5.23	3.32	17.2	14.67	20.27	9.08	4.05	2.6	Adult	M	Mature	-6.45958	-35.6779	0.13	15.087	Chrom2	Deme1
UFPB8476	PB	PBoca	Aw	Caatinga	ArbAr	704.7	366	21.9	33.2	27.61	10.83	12.38	1.3	1.81	3.49	2.31	10.29	8.68	15.3	5.84	2.75	2.43	Subadult	F	Indeterminate	-6.45958	-35.6779	0.105	22.114	Chrom2	Deme1
UFPB8464	PB	PBoca	Aw	Caatinga	ArbAr	704.7	366	21.9	33.2	28.45	11.95	13.14	1.69	2.47	3.83	2.59	11.95	10.11	16.92	6.42	3.16	3.03	Subadult	F	Indeterminate	-6.45958	-35.6779	0.036	21.087	Chrom2	Deme1
UFPB8426	PB	PBoca	Aw	Caatinga	ArbAr	704.7	366	21.9	33.2	27.47	11.38	11.72	1.37	2.21	3.48	2.12	11.3	9.27	16.02	4.26	2.64	2.64	Subadult	F	Indeterminate	-6.45958	-35.6779	0.163	28.657	Chrom2	Deme1
UFPB8461	PB	PBoca	Aw	Caatinga	ArbAr	704.7	366	21.9	33.2	17.1	6.32	6.55	0.91	1.57	2.99	2.15	5.18	5.06	8.76	3.5	1.97	2.18	Juvenile	F	Immature	-6.45958	-35.6779	0.139	13.674	Chrom6	Deme1
UFPB8482	PB	PBoca	Aw	Caatinga	ArbAr	704.7	366	21.9	33.2	19.38	8.77	9.33	2.06	2.24	3.65	2.7	7.63	6.14	11.49	4.69	2.61	2.64	Juvenile	F	Immature	-6.45958	-35.6779	0.076	19.701	Chrom2	Deme1
UFPB8481	PB	PBoca	Aw	Caatinga	ArbAr	704.7	366	21.9	33.2	18.84	8.68	9.27	2.02	2	3.69	2.35	7.55	6.7	10.99	4.46	2.42	2.36	Juvenile	M	Immature	-6.45958	-35.6779	0.09	18.674	Chrom6	Deme1
UFPB8479	PB	PBoca	Aw	Caatinga	ArbAr	704.7	366	21.9	33.2	18.44	8.15	8.24	1.44	2.06	3.36	2.32	6.42	4.82	9.03	4.02	2.3	2.63	Juvenile	M	Immature	-6.45958	-35.6779	0.023	9.26	Chrom5	Deme1
UFPB8429	PB	PBoca	Aw	Caatinga	ArbAr	704.7	366	21.9	33.2	27.14	12.34	12.68	2.77	3.24	4.43	3.09	10.73	9.22	15.42	5.85	3.18	3.33	Subadult	F	Indeterminate	-6.45958	-35.6779	0.053	21.531	Chrom1	Deme1
UFPB8474	PB	PBoca	Aw	Caatinga	ArbAr	704.7	366	21.9	33.2	29.91	13.54	14.41	2.96	3.34	4.5	3.1	13.05	9.92	18.45	8.12	3.63	3.43	Subadult	F	Indeterminate	-6.45958	-35.6779	0.145	18.771	Chrom6	Deme1
UFPB8463	PB	PBoca	Aw	Caatinga	ArbAr	704.7	366	21.9	33.2	25.95	9.69	11.07	2.31	2.92	3.87	2.68	9.4	8.39	12.73	5.34	3.11	3.38	Subadult	M	Indeterminate	-6.45958	-35.6779	0.021	7.005	Chrom5	Deme1
UFPB8450	PB	PBoca	Aw	Caatinga	ArbAr	704.7	366	21.9	33.2	32.84	13.81	15.13	3.02	3.65	4.85	3.29	13.81	10.91	19.08	8.41	3.61	3.71	Subadult	F	Indeterminate	-6.45958	-35.6779	0.25	20.412	Chrom4	Deme1
UFPB8425	PB	PBoca	Aw	Caatinga	ArbAr	704.7	366	21.9	33.2	29.62	13.06	13.96	2.47	2.51	4.11	2.43	11.66	9.48	15.93	5.96	3.34	2.96	Subadult	M	Indeterminate	-6.45958	-35.6779	0.079	22.79	Chrom2	Deme1
UFPB8430	PB	PBoca	Aw	Caatinga	ArbAr	704.7	366	21.9	33.2	23.74	9.09	9.84	2.05	2.35	2.95	1.75	10.16	8.83	14.47	6.17	2.27	2.42	Juvenile	M	Immature	-6.45958	-35.6779	0.11	32.657	Chrom6	Deme1
UFPB8444	PB	PBoca	Aw	Caatinga	ArbAr	704.7	366	21.9	33.2	26.28	10.87	11.51	1.9	2.45	3.54	2.17	9.3	8.86	15.51	7.05	2.44	2.76	Subadult	F	Indeterminate	-6.45958	-35.6779	0.062	23.673	Chrom2	Deme1
UFPB8428	PB	PBoca	Aw	Caatinga	ArbAr	704.7	366	21.9	33.2	21.28	9.4	9.55	1.42	1.75	3.23	1.85	7.73	6.08	13.05	5.19	2.37	2.28	Juvenile	M	Immature	-6.45958	-35.6779	0.1	19.426	Chrom1	Deme1
UFPB8452	PB	PBoca	Aw	Caatinga	ArbAr	704.7	366	21.9	33.2	27.91	10.77	11.56	1.89	2.4	3.37	2.53	10.1	8.46	14.58	6.09	2.61	2.56	Subadult	F	Indeterminate	-6.45958	-35.6779	0.067	25.098	Chrom2	Deme1
UFPB8473	PB	PBoca	Aw	Caatinga	ArbAr	704.7	366	21.9	33.2	23.52	9.38	10.67	1.54	2.12	2.98	2.17	9.57	7.81	13.12	5.35	2.31	2.51	Juvenile	F	Immature	-6.45958	-35.6779	0.035	17.711	Chrom1	Deme1
UFPB8454	PB	PBoca	Aw	Caatinga	ArbAr	704.7	366	21.9	33.2	21.55	9.08	9.96	1.38	1.99	2.68	1.51	9.19	7.17	13.19	5.6	2.15	2.27	Juvenile	M	Immature	-6.45958	-35.6779	0.075	22.825	Chrom6	Deme1
UFPB8458	PB	PBoca	Aw	Caatinga	ArbAr	704.7	366	21.9	33.2	32.43	12.95	15.4	2.47	3.24	4.27	3.08	13.49	10.84	19.57	8.92	4.13	3.71	Subadult	F	Mature	-6.45958	-35.6779	0.071	26.422	Chrom2	Deme1
UFPB8442	PB	PBoca	Aw	Caatinga	ArbAr	704.7	366	21.9	33.2	22.1	9.52	10.58	1.53	1.72	3.03	1.79	8.4	7.73	13.22	4.91	2.09	2.03	Juvenile	M	Immature	-6.45958	-35.6779	0.058	19.406	Chrom2	Deme1
UFPB8490	PB	PBoca	Aw	Caatinga	ArbAr	704.7	366	21.9	33.2	15.43	6.38	6.48	0.98	1.19	2.21	1.34	5.77	4.58	8.48	3.16	1.41	1.64	Juvenile	F	Immature	-6.45958	-35.6779	0.092	20.635	Chrom2	Deme1
UFPB8468	PB	PBoca	Aw	Caatinga	ArbAr	704.7	366	21.9	33.2	24.64	10.3	11.75	1.6	2.42	3.41	1.83	8.78	7.97	13.81	6.62	2.52	2.78	Juvenile	M	Immature	-6.45958	-35.6779	0.155	19.792	Chrom4	Deme1
UFPB8440	PB	PBoca	Aw	Caatinga	ArbAr	704.7	366	21.9	33.2	30.16	13.7	14.82	2.38	2.64	3.95	2.63	13.68	11.24	18.11	5.53	3.77	3.39	Juvenile	F	Indeterminate	-6.45958	-35.6779	0.193	25.882	Chrom6	Deme1
UFPB8439	PB	PBoca	Aw	Caatinga	ArbAr	704.7	366	21.9	33.2	28.82	11.36	12.84	1.82	1.98	3.85	2	11.61	9.14	14.92	6.6	2.87	2.42	Subadult	M	Indeterminate	-6.45958	-35.6779	0.143	18.582	Chrom6	Deme1
UFPB8437	PB	PBoca	Aw	Caatinga	ArbAr	704.7	366	21.9	33.2	24.54	10.61	11.37	1.43	1.61	3.32	2.4	9.36	8	14.32	5.48	2.67	2.24	Subadult	M	Immature	-6.45958	-35.6779	0.057	13.236	Chrom4	Deme1
UFPB8486	PB	PBoca	Aw	Caatinga	ArbAr	704.7	366	21.9	33.2	13.49	5.91	6.32	0.66	0.71	1.87	0.7	4.91	4.02	7.03	3.14	1.04	1.1	Juvenile	M	Immature	-6.45958	-35.6779	0.023	9.726	Chrom2	Deme1
UFPB8475	PB	PBoca	Aw	Caatinga	ArbAr	704.7	366	21.9	33.2	21.73	9.76	9.96	1.21	1.6	2.49	1.69	8.9	7.52	12.45	5.27	1.81	1.87	Juvenile	M	Immature	-6.45958	-35.6779	0.039	15.527	Chrom2	Deme1
UFPB8483	PB	PBoca	Aw	Caatinga	ArbAr	704.7	366	21.9	33.2	13.76	6	6.31	0.67	0.83	1.03	0.78	5.37	4.17	7.54	3.19	1.18	1.34	Juvenile	M	Immature	-6.45958	-35.6779	0.062	10.324	Chrom2	Deme1
UFPB8434	PB	PBoca	Aw	Caatinga	ArbAr	704.7	366	21.9	33.2	15.85	7.01	7.23	1.1	1.18	2.23	0.86	6.28	5.09	9.19	3.19	1.6	1.65	Juvenile	M	Immature	-6.45958	-35.6779	0.056	16.633	Chrom2	Deme1
UFPB8488	PB	PBoca	Aw	Caatinga	ArbAr	704.7	366	21.9	33.2	19.62	8.21	8.9	1.14	1.44	2.48	1.07	6.95	5.72	10.92	4.87	1.7	1.89	Juvenile	M	Immature	-6.45958	-35.6779	0.04	9.321	Chrom5	Deme1
UFPB8492	PB	PBoca	Aw	Caatinga	ArbAr	704.7	366	21.9	33.2	20.15	8.33	8.86	1.08	1.92	2.76	1.81	8.24	7.82	10.93	5.24	2.29	1.83	Juvenile	M	Immature	-6.45958	-35.6779	0.108	19.133	Chrom4	Deme1
UFPB8470	PB	PBoca	Aw	Caatinga	ArbAr	704.7	366	21.9	33.2	18.94	8.68	8.51	0.65	1.55	2.49	1.79	8.1	7.14	10.75	4.02	1.88	1.65	Juvenile	F	Immature	-6.45958	-35.6779	0.02	14.143	Chrom1	Deme1
UFPB8455	PB	PBoca	Aw	Caatinga	ArbAr	704.7	366	21.9	33.2	17.72	6.28	7.45	0.82	1.28	2.81	1.96	7.15	6.63	8.88	3.92	1.58	1.63	Juvenile	M	Immature	-6.45958	-35.6779	0.035	16.189	Chrom5	Deme1
UFPB8491	PB	PBoca	Aw	Caatinga	ArbAr	704.7	366	21.9	33.2	13.17	6.8	5.84	0.78	1.24	1.96	1.58	4.79	5.24	8.3	3.15	0.94	1.57	Juvenile	F	Immature	-6.45958	-35.6779	0.042	16.821	Chrom2	Deme1
UFPB8459	PB	PBoca	Aw	Caatinga	ArbAr	704.7	366	21.9	33.2	17.14	8.42	7.78	0.58	1.77	2.61	1.38	6.27	6.41	9.23	4.13	1.79	1.67	Juvenile	F	Immature	-6.45958	-35.6779	0.066	18.464	Chrom2	Deme1
UFPB8457	PB	PBoca	Aw	Caatinga	ArbAr	704.7	366	21.9	33.2	14.83	6.91	6.62	1.5	1.7	2.48	1.74	6.51	5.55	8.72	3.67	1.46	1.18	Juvenile	M	Immature	-6.45958	-35.6779	0.014	6.014	Chrom2	Deme1
UFPB8436	PB	PBoca	Aw	Caatinga	ArbAr	704.7	366	21.9	33.2	33.25	12.41	14.81	2.08	2.37	3.87	2.57	13.15	11.09	18.54	7.5	3.11	2.66	Juvenile	F	Indeterminate	-6.45958	-35.6779	0.246	19.551	Chrom6	Deme1
UFPB8462	PB	PBoca	Aw	Caatinga	ArbAr	704.7	366	21.9	33.2	25.67	10.82	11.39	1.56	1.88	3.31	2.12	9.46	7.44	14.96	5.96	2.78	2.52	Subadult	F	Indeterminate	-6.45958	-35.6779	0.038	16.82	Chrom4	Deme1
UFPB8489	PB	PBoca	Aw	Caatinga	ArbAr	704.7	366	21.9	33.2	21.55	8.6	8.14	1.14	1.71	2.64	1.97	6.28	5.66	11.25	4.35	1.8	1.91	Subadult	M	Immature	-6.45958	-35.6779	0.019	7.929	Chrom5	Deme1
UFPB8456	PB	PBoca	Aw	Caatinga	ArbAr	704.7	366	21.9	33.2	62.17	24.65	27.9	4.02	4.73	8.65	4.05	24.09	20.44	34.17	12.59	6.39	5.66	Adult	F	Mature	-6.45958	-35.6779	0.144	17.785	Chrom4	Deme1
UFPB8465	PB	PBoca	Aw	Caatinga	ArbAr	704.7	366	21.9	33.2	49.65	20.15	22.43	3.7	4.08	7.71	3.88	18.93	16.67	24.84	11.14	5.48	4.41	Adult	M	Mature	-6.45958	-35.6779	0.493	27.263	Chrom2	Deme1
UFPB8438	PB	PBoca	Aw	Caatinga	ArbAr	704.7	366	21.9	33.2	46.06	17.5	21.42	3.09	4.15	6.15	2.85	18.17	16.21	25.51	10.61	4.67	4.04	Adult	M	Indeterminate	-6.45958	-35.6779	0.196	13.586	Chrom2	Deme1
UFPB8449	PB	PBoca	Aw	Caatinga	ArbAr	704.7	366	21.9	33.2	37.33	14.4	16.58	1.26	2.86	4.37	2.06	13.11	10.55	19.86	7.99	3.14	2.97	Adult	M	Indeterminate	-6.45958	-35.6779	0.161	17.983	Chrom3	Deme1
UFPB8453	PB	PBoca	Aw	Caatinga	ArbAr	704.7	366	21.9	33.2	59.97	21.67	26.56	3.33	4.65	6.93	3.27	21.99	19.25	31.87	11.78	6.01	4.81	Adult	F	Mature	-6.45958	-35.6779	0.146	17.622	Chrom2	Deme1
UFPB8447	PB	PBoca	Aw	Caatinga	ArbAr	704.7	366	21.9	33.2	46.58	16.78	19.98	3.11	3.18	4.3	2.52	16.85	14.96	26.1	10.14	4.49	4.01	Adult	M	Mature	-6.45958	-35.6779	0.138	14.424	Chrom2	Deme1
UFPB8431	PB	PBoca	Aw	Caatinga	ArbAr	704.7	366	21.9	33.2	33.9	14.15	15.65	1.68	2.27	4.41	2.2	12.42	11.57	20.06	7.7	3.39	2.79	Subadult	M	Indeterminate	-6.45958	-35.6779	0.184	24.353	Chrom5	Deme1
UFPB8466	PB	PBoca	Aw	Caatinga	ArbAr	704.7	366	21.9	33.2	47.97	20.42	24.14	2.79	3.73	5.9	3.15	21.38	17.83	27.78	12.35	5.41	3.75	Adult	F	Indeterminate	-6.45958	-35.6779	0.205	27.229	Chrom2	Deme1
UFPB8487	PB	PBoca	Aw	Caatinga	ArbAr	704.7	366	21.9	33.2	56.55	22.05	26.98	4.07	3.9	7.26	3.94	22.04	18.92	30.03	12.82	5.85	4.55	Adult	F	Indeterminate	-6.45958	-35.6779	0.315	18.422	Chrom6	Deme1
UFPB8451	PB	PBoca	Aw	Caatinga	ArbAr	704.7	366	21.9	33.2	57.31	21.4	24.97	3.55	4.33	6.57	3.29	22.59	18.97	30.29	11.94	6.31	5.15	Adult	F	Indeterminate	-6.45958	-35.6779	0.371	23.538	Chrom2	Deme1
UFPB8427	PB	PBoca	Aw	Caatinga	ArbAr	704.7	366	21.9	33.2	42.51	17	18.82	2.56	3.17	5.35	2.73	15.6	13.88	22.22	9.24	4.02	3.38	Adult	M	Indeterminate	-6.45958	-35.6779	0.092	16.061	Chrom2	Deme1
UFPB8484	PB	PBoca	Aw	Caatinga	ArbAr	704.7	366	21.9	33.2	21.77	8.46	9.99	0.7	1.36	2.96	1.13	7.97	7.07	12.87	5	2.05	1.92	Juvenile	F	Immature	-6.45958	-35.6779	0.183	26.657	Chrom6	Deme1
UFPB8432	PB	PBoca	Aw	Caatinga	ArbAr	704.7	366	21.9	33.2	24.98	10.61	11.11	1.34	2.01	3.17	2.23	8.98	7.78	14.16	5.65	2.67	2.04	Juvenile	F	Immature	-6.45958	-35.6779	0.005	0.192	Chrom5	Deme1
UFPB8478	PB	PBoca	Aw	Caatinga	ArbAr	704.7	366	21.9	33.2	21.27	8.28	9.57	1.26	1.2	2.89	1.21	8.74	6.65	12.17	5.27	1.92	1.97	Juvenile	M	Immature	-6.45958	-35.6779	0.041	16.503	Chrom6	Deme1
UFPB8472	PB	PBoca	Aw	Caatinga	ArbAr	704.7	366	21.9	33.2	25.32	9.27	10.53	1.43	1.92	3.26	1.72	9.22	7.13	13.51	5.48	2.36	2.66	Subadult	M	Indeterminate	-6.45958	-35.6779	0.079	17.97	Chrom6	Deme1
UFPB8471	PB	PBoca	Aw	Caatinga	ArbAr	704.7	366	21.9	33.2	22.59	10.29	10.97	1.24	2.1	3.41	1.99	9.08	8.57	13.96	5.42	2.64	2.52	Juvenile	M	Immature	-6.45958	-35.6779	0.057	14.01	Chrom2	Deme1
UFPB8446	PB	PBoca	Aw	Caatinga	ArbAr	704.7	366	21.9	33.2	36.77	13.69	15.6	2.45	3.35	4.15	2.37	15.42	12.47	19.96	7.68	4.03	3.04	Adult	M	Indeterminate	-6.45958	-35.6779	0.088	19.644	Chrom2	Deme1
UFPB10339	PI	Piripiri	Aw	FBM	AreTenSFE	835.1	155	22.1	33.5	27.84	11.02	13.4	1.7	2.26	4.84	2.95	10.1	7.24	15.52	5.91	2.81	2.79	Subadult	M	Indeterminate	-4.35403	-41.8399	0.307	17.324	Chrom1	Deme5
CHUFPB22177	CE	Quixada	Aw	Caatinga	AreIU	857.7	196	22.7	32.5	46.34	18.34	19.22	2.04	3.25	6.28	3.74	18	15.5	24.1	10.55	4.03	3.93	Adult	M	Mature	-4.97256	-39.0154	0.135	20.324	Chrom1	Deme2
CHUFPB22191	CE	Quixada	Aw	Caatinga	AreIU	857.7	196	22.7	32.5	51.89	17	20.8	2.59	3.13	6.26	4.23	18.32	16.89	25.65	9.26	4.48	4.39	Adult	M	Mature	-4.97256	-39.0154	0.104	18.958	Chrom1	Deme2
CHUFPB19935	CE	Quixada	Aw	Caatinga	AreIU	857.7	196	22.7	32.5	49.73	20.66	22.37	2.79	2.89	5.92	4.12	19.67	17.87	27.52	11.44	4.42	4.55	Adult	M	Mature	-4.97256	-39.0154	0.081	15.009	Chrom3	Deme2
z159	CE	Quixada	Aw	Caatinga	AreIU	857.7	196	22.7	32.5	49.73	20.66	22.37	2.79	2.89	5.92	4.12	19.67	17.87	27.52	11.44	4.42	4.55	Adult	M	Mature	-4.97256	-39.0154	0.081	15.009	Chrom3	Deme2
z160	CE	Quixada	Aw	Caatinga	AreIU	857.7	196	22.7	32.5	49.72	20.65	22.36	2.78	2.88	5.91	4.11	19.66	17.86	27.51	11.43	4.41	4.55	Adult	M	Mature	-4.97256	-39.0154	0.081	15.009	Chrom3	Deme2
CHUFPB21054	RN	SantaCruz	BSh	Caatinga	SEArA	704.7	333	21.9	33.2	31.41	12.19	12.52	2.13	2.01	4.13	2.76	11.97	11.17	17.24	7.19	2.83	2.74	Subadult	M	Mature	-6.18918	-36.0925	0.006	2.405	Chrom6	Deme4
CHUFPB20928	RN	SantanadosMatos	BSh	Caatinga	SEFDA	873.5	146	21	32.2	13.93	5.35	5.1	1.57	1.38	2.38	1.41	5.07	4.46	7.22	3.32	1.1	1.72	Juvenile	F	Immature	-5.96415	-36.6589	0.013	1.852	Chrom1	Deme4
CHUFPB20660	RN	SantanadosMatos	BSh	Caatinga	SEFDA	873.5	146	21	32.2	16.56	5.95	7.46	1.26	1.26	2.77	1.71	6.61	5.57	9.23	3.41	1.33	2.06	Juvenile	F	Immature	-5.96415	-36.6589	0.029	3.707	Chrom4	Deme4
CHUFPB20897	RN	SantanadosMatos	BSh	Caatinga	SEFDA	873.5	146	21	32.2	16.76	6.01	6.76	1.51	1.51	2.51	1.68	6.71	5.97	9.1	3.7	1.44	2.02	Juvenile	F	Immature	-5.96415	-36.6589	0.013	4.773	Chrom1	Deme4
CHUFPB20890	RN	SantanadosMatos	BSh	Caatinga	SEFDA	873.5	146	21	32.2	15.01	6.01	6.48	1.48	1.64	2.53	1.29	5.85	5.61	6.35	3.65	1.42	1.59	Juvenile	F	Immature	-5.96415	-36.6589	0.017	3.374	Chrom2	Deme4
CHUFPB20840	RN	SantanadosMatos	BSh	Caatinga	SEFDA	873.5	146	21	32.2	41.63	15.66	16.78	2.76	2.84	5.4	3.34	15.79	13.6	21.75	8.93	5	4.02	Adult	F	Indeterminate	-5.96415	-36.6589	0.049	17.111	Chrom2	Deme4
CHUFPB19938	RN	SantanadosMatos	BSh	Caatinga	SEFDA	873.5	146	21	32.2	37.86	14.23	16.42	2.07	2.23	4.92	3.65	14.15	13.63	19.9	9.08	3.77	4.06	Adult	M	Mature	-5.96415	-36.6589	0.041	12.754	Chrom2	Deme4
CHUFPB20857	RN	SantanadosMatos	BSh	Caatinga	SEFDA	873.5	146	21	32.2	32.79	11.9	12.97	1.98	2.64	4.13	2.69	13.54	11.97	19.81	8.86	3.01	2.98	Subadult	M	Mature	-5.96415	-36.6589	0.064	8.35	Chrom1	Deme4
z170	RN	SantanadosMatos	BSh	Caatinga	SEFDA	873.5	146	21	32.2	16.76	6.01	6.76	1.52	1.51	2.51	1.68	6.71	5.97	9.1	3.7	1.44	2.02	Juvenile	F	Immature	-5.96415	-36.6589	0.013	4.773	Chrom1	Deme4
z171	RN	SantanadosMatos	BSh	Caatinga	SEFDA	873.5	146	21	32.2	16.76	6.01	6.75	1.5	1.5	2.51	1.67	6.71	5.97	9.1	3.7	1.44	2.03	Juvenile	F	Immature	-5.96415	-36.6589	0.013	4.773	Chrom1	Deme4
z172	RN	SantanadosMatos	BSh	Caatinga	SEFDA	873.5	146	21	32.2	32.79	11.9	12.97	1.98	2.64	4.13	2.69	13.54	11.97	19.81	8.86	3.01	2.98	Subadult	M	Mature	-5.96415	-36.6589	0.064	8.35	Chrom1	Deme4
z173	RN	SantanadosMatos	BSh	Caatinga	SEFDA	873.5	146	21	32.2	16.56	5.96	7.46	1.26	1.26	2.77	1.71	6.61	5.57	9.23	3.41	1.33	2.06	Juvenile	F	Immature	-5.96415	-36.6589	0.029	3.707	Chrom4	Deme4
z174	RN	SantanadosMatos	BSh	Caatinga	SEFDA	873.5	146	21	32.2	16.56	5.95	7.46	1.26	1.27	2.78	1.71	6.63	5.58	9.23	3.41	1.33	2.05	Juvenile	F	Immature	-5.96415	-36.6589	0.029	3.707	Chrom4	Deme4
CHUFPB22203	RN	SerradeSãoBento	Aw	Caatinga	ArbAr	704.7	414	21.9	33.2	58.23	17.8	22.6	2.83	4	6.09	4.06	19.96	19.05	31.59	14.42	4.85	4.83	Adult	F	Mature	-6.41881	-35.7043	0.11	13.633	Chrom2	Deme1
CHUFPB22200	RN	SerradeSãoBento	Aw	Caatinga	ArbAr	704.7	414	21.9	33.2	38.89	11.6	16.5	2.3	2.9	4.84	3.34	12.95	12.12	20.18	8.83	3.21	3.34	Adult	M	Mature	-6.41881	-35.7043	0.033	22.478	Chrom1	Deme1
UFPB11687	PB	Smamede	Aw	Caatinga	SEArA	704.7	271	21.9	33.2	43.03	15.58	19.96	2.31	3.19	4.41	2.17	17.52	14.19	22.17	8.93	3.77	3.53	Adult	M	Mature	-6.89389	-37.083	0.068	20.342	Chrom1	Deme2
UFPB11686	PB	Smamede	Aw	Caatinga	SEArA	704.7	271	21.9	33.2	44.78	17.46	20.23	2.54	2.78	5.55	2.07	16.99	13.7	22.92	7.6	4.12	3.49	Adult	M	Mature	-6.89389	-37.083	0.121	17.221	Chrom2	Deme2
UFPB10760	CE	Squitéria	Aw	Caatinga	SEArA	995.6	200	22.4	33.5	27.94	10	11.91	1.4	1.9	3.45	2.34	10.28	8.98	14.41	5.62	2.45	2.82	Subadult	F	Indeterminate	-4.32427	-40.1428	0.093	21.39	Chrom2	Deme3
UFPB10752	CE	Squitéria	Aw	Caatinga	SEArA	995.6	200	22.4	33.5	27.85	10.75	10.86	2.06	2.45	3.74	2.64	10.65	8.41	13.72	5.98	2.35	1.91	Subadult	M	Indeterminate	-4.32427	-40.1428	0.052	18.604	Chrom4	Deme3
UFPB10759	CE	Squitéria	Aw	Caatinga	SEArA	995.6	200	22.4	33.5	24.27	9.55	11.08	1.5	2.04	3.19	2.04	9.13	7.77	14.13	5.82	2.47	2.41	Juvenile	F	Immature	-4.32427	-40.1428	0.066	17.042	Chrom4	Deme3
z218	CE	Squitéria	Aw	Caatinga	SEArA	995.6	200	22.4	33.5	27.84	10.74	10.85	2.07	2.45	3.73	2.65	10.64	8.42	13.73	5.97	2.35	1.9	Subadult	M	Indeterminate	-4.32427	-40.1428	0.052	18.604	Chrom4	Deme3
z219	CE	Squitéria	Aw	Caatinga	SEArA	995.6	200	22.4	33.5	27.85	10.75	10.86	2.06	2.45	3.74	2.64	10.65	8.41	13.72	5.98	2.35	1.91	Subadult	M	Indeterminate	-4.32427	-40.1428	0.052	18.604	Chrom4	Deme3
z220	CE	Squitéria	Aw	Caatinga	SEArA	995.6	200	22.4	33.5	27.85	10.77	10.88	2.07	2.46	3.75	2.64	10.66	8.43	13.73	6.009	2.36	1.93	Subadult	M	Indeterminate	-4.32427	-40.1428	0.052	18.604	Chrom4	Deme3
UFPB9655	PE	Stalhada	BSh	Caatinga	SEArA	1409.8	432	16.7	26.3	25.87	10.6	11.64	1.58	2.14	3.65	1.85	10.82	8.65	15.51	6.43	2.62	2.67	Subadult	M	Indeterminate	-8.01495	-38.2899	0.097	14.487	Chrom2	Deme3
UFPB9658	PE	Stalhada	BSh	Caatinga	SEArA	1409.8	432	16.7	26.3	19.13	10.26	8.65	1.25	1.91	3.07	3.03	8.84	6.9	11.39	4.52	2.26	2.49	Juvenile	M	Immature	-8.01495	-38.2899	0.06	14.164	Chrom6	Deme3
UFPB9657	PE	Stalhada	BSh	Caatinga	SEArA	1409.8	432	16.7	26.3	13.13	6.08	5.19	1	1.53	2.4	1.72	6	4.87	8.79	3.02	1.42	1.2	Juvenile	M	Immature	-8.01495	-38.2899	0.021	12.873	Chrom1	Deme3
UFPB9656	PE	Stalhada	BSh	Caatinga	SEArA	1409.8	432	16.7	26.3	42.86	15.38	17.07	2.59	3.21	5.02	2.68	16	13.61	23.92	9.06	4.36	3.21	Adult	M	Mature	-8.01495	-38.2899	0.085	22.32	Chrom2	Deme3
UFPB9659	PE	Stalhada	BSh	Caatinga	SEArA	1409.8	432	16.7	26.3	53.86	18.89	23.54	3.29	4.15	6.5	3.38	18.92	17.64	28.72	12.9	5.18	4.13	Adult	F	Indeterminate	-8.01495	-38.2899	0.125	14.762	Chrom1	Deme3
z233	PE	Stalhada	BSh	Caatinga	SEArA	1409.8	432	16.7	26.3	25.87	10.61	11.63	1.59	2.15	3.65	1.86	10.83	8.66	15.52	6.43	2.63	2.67	Subadult	M	Indeterminate	-8.01495	-38.2899	0.097	14.487	Chrom2	Deme3
z234	PE	Stalhada	BSh	Caatinga	SEArA	1409.8	432	16.7	26.3	25.87	10.6	11.64	1.58	2.14	3.64	1.85	10.82	8.65	15.51	6.43	2.62	2.67	Subadult	M	Indeterminate	-8.01495	-38.2899	0.097	14.487	Chrom2	Deme3
z239	PE	Stalhada	BSh	Caatinga	SEArA	1409.8	432	16.7	26.3	19.13	10.26	8.65	1.25	1.91	3.07	3.03	8.84	6.9	11.39	4.52	2.26	2.49	Juvenile	M	Immature	-8.01495	-38.2899	0.06	14.164	Chrom6	Deme3
UFPB9672	PE	Trindade	Aw	Caatinga	SEArA	660.6	519	19.9	30.7	38.1	14.88	17.21	2.01	3.18	3.75	3.16	15.83	12.78	21.79	8.56	3.64	3.54	Adult	M	Mature	-7.74198	-40.2885	0.06	12.61	Chrom2	Deme2
UFPB9676	PE	Trindade	Aw	Caatinga	SEArA	660.6	519	19.9	30.7	52.67	17.81	21.48	2.87	3.43	6.22	2.91	18.87	26.54	10.41	4.39	3.76	3.76	Adult	M	Mature	-7.74198	-40.2885	0.073	13.207	Chrom2	Deme2
UFPB9674	PE	Trindade	Aw	Caatinga	SEArA	660.6	519	19.9	30.7	53.48	18.86	24.61	2.82	2.92	6.4	2.43	18.97	16.29	27.66	10.99	4.81	4.29	Adult	M	Mature	-7.74198	-40.2885	0.1	17.988	Chrom3	Deme2
UFPB974	PE	Trindade	Aw	Caatinga	SEArA	660.6	519	19.9	30.7	63.78	22.03	27.63	3.63	3.64	6.13	3.31	23.38	19.79	32.77	12.92	6.18	4.54	Adult	F	Mature	-7.74198	-40.2885	0.161	19.896	Chrom2	Deme2
UFPB9673	PE	Trindade	Aw	Caatinga	SEArA	660.6	519	19.9	30.7	59.38	21.73	26.68	3.59	3.89	6.88	3.24	21.76	19.74	31.58	13.15	5.87	4.71	Adult	F	Mature	-7.74198	-40.2885	0.103	13.54	Chrom6	Deme2
UFPB9677	PE	Trindade	Aw	Caatinga	SEArA	660.6	519	19.9	30.7	54.45	19.13	22.81	3.1	3.17	5.73	2.23	17.37	16.57	25.94	10.87	4.61	4.28	Adult	F	Mature	-7.74198	-40.2885	0.303	27.18	Chrom3	Deme2
z244	PE	Trindade	Aw	Caatinga	SEArA	660.6	519	19.9	30.7	53.49	18.86	24.61	2.82	2.91	6.4	2.43	18.96	16.29	27.66	10.99	4.81	4.29	Adult	M	Mature	-7.74198	-40.2885	0.1	17.988	Chrom3	Deme2
z245	PE	Trindade	Aw	Caatinga	SEArA	660.6	519	19.9	30.7	53.48	18.87	24.62	2.82	2.92	6.4	2.43	18.97	16.3	27.67	10.99	4.81	4.28	Adult	M	Mature	-7.74198	-40.2885	0.1	17.988	Chrom3	Deme2
z246	PE	Trindade	Aw	Caatinga	SEArA	660.6	519	19.9	30.7	53.48	18.86	24.61	2.82	2.93	6.4	2.43	18.98	16.29	27.66	10.99	4.81	4.29	Adult	M	Mature	-7.74198	-40.2885	0.1	17.988	Chrom3	Deme2
z247	PE	Trindade	Aw	Caatinga	SEArA	660.6	519	19.9	30.7	54.45	19.13	22.81	3.1	3.17	5.73	2.23	17.37	16.57	25.94	10.87	4.61	4.28	Adult	F	Mature	-7.74198	-40.2885	0.303	27.18	Chrom3	Deme2
z248	PE	Trindade	Aw	Caatinga	SEArA	660.6	519	19.9	30.7	54.44	19.12	22.81	3.1	3.17	5.73	2.23	17.37	16.57	25.94	10.86	4.6	4.27	Adult	F	Mature	-7.74198	-40.2885	0.303	27.18	Chrom3	Deme2
z250	PE	Trindade	Aw	Caatinga	SEArA	660.6	519	19.9	30.7	52.66	17.82	21.49	2.87	3.43	6.23	2.92	18.88	26.54	10.41	4.39	3.76	3.76	Adult	M	Mature	-7.74198	-40.2885	0.073	13.207	Chrom2	Deme2
z251	PE	Trindade	Aw	Caatinga	SEArA	660.6	519	19.9	30.7	52.67	17.81	21.48	2.87	3.42	6.22	2.91	18.87	26.54	10.42	4.39	3.76	3.76	Adult	M	Mature	-7.74198	-40.2885	0.073	13.207	Chrom2	Deme2
CHUFPB22225	PE	Ubajara	Aw	CaUmida	FOSuA	995.6	836	22.4	33.5	34.66	16.61	18.85	2.27	3.17	5.15	2.66	14.89	14.34	22.24	9.69	3.69	3.79	Subadult	M	Indeterminate	-8.61603	-37.1656	0.039	11.476	Chrom6	Deme5
CHUFPB22190	CE	Ubajara	Aw	CaUmida	FOSuA	995.6	836	22.4	33.5	32.54	11.99	13.81	2.16	2.21	5.33	2.87	13.14	17.43	17.13	6.81	3.03	3.25	Subadult	M	Indeterminate	-3.85707	-40.9221	0.034	8.745	Chrom6	Deme5
CHUFPB22179	CE	Ubajara	Aw	CaUmida	FOSuA	995.6	836	22.4	33.5	36.97	12.31	14.65	1.64	2.96	4.96	3.3	13.06	12.85	20.01	7.52	3.16	3.36	Adult	M	Mature	-3.85707	-40.9221	0.028	7.993	Chrom1	Deme5
CHUFPB22194	CE	Ubajara	Aw	CaUmida	FOSuA	995.6	836	22.4	33.5	40.04	12.1	16.65	1.95	2.34	4.83	3.25	13.49	13.51	18.31	8.94	2.96	4.22	Adult	M	Mature	-3.85707	-40.9221	0.048	10.268	Chrom1	Deme5
CHUFPB19726	CE	Ubajara	Aw	CaUmida	FOSuA	995.6	836	22.4	33.5	21.72	8.82	9.26	1.89	2.03	3.64	1.94	8.44	7.98	13.17	5.57	2.22	2.5	Juvenile	M	Immature	-3.85707	-40.9221	0.022	5.903	Chrom5	Deme5
CHUFPB19729	CE	Ubajara	Aw	CaUmida	FOSuA	995.6	836	22.4	33.5	19.01	6.83	8.15	1.43	1.82	2.81	2.05	7.94	6.6	11.07	4.23	1.54	2.26	Juvenile	F	Immature	-3.85707	-40.9221	0.012	5.279	Chrom5	Deme5
CHUFPB21347	CE	Ubajara	Aw	CaUmida	FOSuA	995.6	836	22.4	33.5	32.9	11.74	14.22	1.97	1.91	4.92	3.02	12.93	11.84	16.87	6.81	2.94	3.15	Subadult	F	Mature	-3.85707	-40.9221	0.065	15.433	Chrom2	Deme5
CHUFPB22217	CE	Ubajara	Aw	CaUmida	FOSuA	995.6	836	22.4	33.5	18.26	6.96	8.55	1.41	1.39	2.4	1.85	7.38	6.1	10.74	4.01	1.52	2.36	Juvenile	M	Immature	-3.85707	-40.9221	0.029	7.786	Chrom2	Deme5
CHUFPB22222	CE	Ubajara	Aw	CaUmida	FOSuA	995.6	836	22.4	33.5	36.7	13.66	15.68	2.31	2.7	5.02	3.25	11.95	12.98	20.13	8.07	3.01	3.67	Adult	F	Mature	-3.85707	-40.9221	0.067	9.394	Chrom2	Deme5
CHUFPB20671	CE	Ubajara	Aw	CaUmida	FOSuA	995.6	836	22.4	33.5	44.42	14.33	18.8	2.35	3.04	4.94	4.04	13.31	14.7	22.89	9.8	3.91	4.09	Adult	M	Mature	-3.85707	-40.9221	0.098	17.559	Chrom2	Deme5
CHUFPB20681	CE	Ubajara	Aw	CaUmida	FOSuA	995.6	836	22.4	33.5	41.42	13.74	17.81	2.28	3.08	5.69	3.86	15.9	14.89	23.49	9.93	3.74	4.02	Adult	M	Mature	-3.85707	-40.9221	0.078	11.095	Chrom2	Deme5
CHUFPB20683	CE	Ubajara	Aw	CaUmida	FOSuA	995.6	836	22.4	33.5	29.66	12.01	13.46	1.77	1.71	4.01	2.57	10.95	11.07	16.77	6.64	2.52	2.92	Subadult	F	Indeterminate	-3.85707	-40.9221	0.078	15.28	Chrom6	Deme5
CHUFPB21355	CE	Ubajara	Aw	CaUmida	FOSuA	995.6	836	22.4	33.5	39.89	11.58	14.44	2.22	3.02	4.95	2.8	12.48	14.8	21.97	8.85	3.44	4.02	Adult	F	Mature	-3.85707	-40.9221	0.13	14.523	Chrom1	Deme5
CHUFPB20654	CE	Ubajara	Aw	CaUmida	FOSuA	995.6	836	22.4	33.5	30.18	11.42	12.86	1.87	2.17	4.04	2.64	11.67	10.5	16.93	6.82	2.56	3.51	Subadult	M	Indeterminate	-3.85707	-40.9221	0.052	12.718	Chrom2	Deme5
CHUFPB20680	CE	Ubajara	Aw	CaUmida	FOSuA	995.6	836	22.4	33.5	35.28	13.09	14.07	2.29	2.6	4.62	3.53	13.95	12.02	19.35	7.7	3.44	3.11	Adult	M	Mature	-3.85707	-40.9221	0.024	9.732	Chrom5	Deme5
CHUFPB22178	CE	Ubajara	Aw	CaUmida	FOSuA	995.6	836	22.4	33.5	52.35	17.11	20.85	2.94	3.44	6.09	4.89	21.06	18.42	29.4	11.57	4.31	4.27	Adult	F	Mature	-3.85707	-40.9221	0.01	5.913	Chrom5	Deme5
CHUFPB21349	CE	Ubajara	Aw	CaUmida	FOSuA	995.6	836	22.4	33.5	33.75	11.28	13.26	2.28	2.2	4.84	2.75	13.35	12.1	19.1	7.58	2.87	3.67	Subadult	F	Mature	-3.85707	-40.9221	0.038	7.151	Chrom1	Deme5
CHUFPB22205	CE	Ubajara	Aw	CaUmida	FOSuA	995.6	836	22.4	33.5	30.58	12.75	13.38	1.93	2.12	5.07	2.79	12.68	11.2	18.41	7.69	2.73	3.42	Subadult	M	Mature	-3.85707	-40.9221	0.017	3.244	Chrom1	Deme5
CHUFPB22187	CE	Ubajara	Aw	CaUmida	FOSuA	995.6	836	22.4	33.5	34.85	12.49	14.5	2.25	2.58	3.97	3.16	14.16	12.18	19.41	7.85	2.96	3.35	Subadult	M	Mature	-3.85707	-40.9221	0.024	5.591	Chrom2	Deme5
CHUFPB20662	CE	Ubajara	Aw	CaUmida	FOSuA	995.6	836	22.4	33.5	37.5	15.03	17.19	2.54	2.73	5.14	3.54	15.84	14.36	22.19	8.21	4.03	4.48	Adult	F	Mature	-3.85707	-40.9221	0.073	10.027	Chrom2	Deme5
CHUFPB21351	CE	Ubajara	Aw	CaUmida	FOSuA	995.6	836	22.4	33.5	34.91	13.39	15.04	2.23	2.08	4.3	3.32	13.57	12.22	19.65	7.86	3.63	3.54	Subadult	M	Mature	-3.85707	-40.9221	0.043	6.746	Chrom2	Deme5
CHUFPB21056	CE	Ubajara	Aw	CaUmida	FOSuA	995.6	836	22.4	33.5	37.14	14.77	16.58	3.11	2.63	4.95	3.91	17.04	14.83	23.99	9.27	4.04	3.9	Adult	F	Mature	-3.85707	-40.9221	0.035	9.762	Chrom2	Deme5
CHUFPB20938	CE	Ubajara	Aw	CaUmida	FOSuA	995.6	836	22.4	33.5	33.16	12.65	12.98	1.99	2	4.32	3.03	11.99	12.58	16.98	6.78	2.63	3.52	Subadult	F	Mature	-3.85707	-40.9221	0.056	11.321	Chrom2	Deme5
CHUFPB20896	CE	Ubajara	Aw	CaUmida	FOSuA	995.6	836	22.4	33.5	44.08	16.78	18.71	2.71	3.69	5.83	3.67	16.24	15.44	23.93	9.79	4.62	4.21	Adult	F	Mature	-3.85707	-40.9221	0.043	8.751	Chrom1	Deme5
CHUFPB19886	CE	Ubajara	Aw	CaUmida	FOSuA	995.6	836	22.4	33.5	44.67	18.47	17.91	2.71	3.18	5.42	3.88	15.62	15.81	22.45	10.86	3.86	3.95	Adult	M	Mature	-3.85707	-40.9221	0.029	11.043	Chrom1	Deme5
CHUFPB20930	CE	Ubajara	Aw	CaUmida	FOSuA	995.6	836	22.4	33.5	45.91	17.23	17.67	2.29	3.65	5.04	3.49	18.89	15.77	24.25	10.04	3.13	3.74	Adult	M	Mature	-3.85707	-40.9221	0.041	10.809	Chrom2	Deme5
CHUFPB20792	CE	Ubajara	Aw	CaUmida	FOSuA	995.6	836	22.4	33.5	43.55	18.82	18.62	2.77	2.96	5.63	4.06	19.33	16.5	24.24	14.78	3.87	4.37	Adult	M	Mature	-3.85707	-40.9221	0.039	10.269	Chrom3	Deme5
CHUFPB19969	CE	Ubajara	Aw	CaUmida	FOSuA	995.6	836	22.4	33.5	39.7	16.14	16.15	3.27	3.29	4.77	3.49	15.13	14.62	19.83	12.95	3.75	3.97	Adult	M	Mature	-3.85707	-40.9221	0.037	5.836	Chrom1	Deme5
CHUFPB20943	CE	Ubajara	Aw	CaUmida	FOSuA	995.6	836	22.4	33.5	33.15	11.89	13.42	2.11	2.74	4.58	2.88	11.57	12.04	18.13	6.98	3.24	3.25	Subadult	M	Mature	-3.85707	-40.9221	0.028	9.566	Chrom2	Deme5
CHUFPB20876	CE	Ubajara	Aw	CaUmida	FOSuA	995.6	836	22.4	33.5	43.11	18.31	17.16	2.41	2.86	5.12	3.76	14.97	15.36	22.35	9.33	4.17	3.99	Adult	F	Indeterminate	-3.85707	-40.9221	0.022	13.512	Chrom1	Deme5
CHUFPB20854	CE	Ubajara	Aw	CaUmida	FOSuA	995.6	836	22.4	33.5	43.82	15.98	16.53	2.24	3.13	5.2	3.66	15.19	14.94	21.93	10.03	4.3	4.15	Adult	M	Indeterminate	-3.85707	-40.9221	0.052	11.11	Chrom2	Deme5
CHUFPB20818	CE	Ubajara	Aw	CaUmida	FOSuA	995.6	836	22.4	33.5	28.02	11.09	13.7	2.24	2.59	4.53	2.44	12.69	11.27	16.67	7.67	2.8	3.33	Subadult	M	Indeterminate	-3.85707	-40.9221	0.046	5.085	Chrom2	Deme5
CHUFPB20933	CE	Ubajara	Aw	CaUmida	FOSuA	995.6	836	22.4	33.5	46.48	19.11	2.97	2.81	4.37	6.24	3.47	19.03	16.16	24.56	11.53	4.19	4.21	Adult	M	Indeterminate	-3.85707	-40.9221	0.077	15.363	Chrom2	Deme5
CHUFPB20946	CE	Ubajara	Aw	CaUmida	FOSuA	995.6	836	22.4	33.5	38.87	15.3	17.52	2.68	2.99	4.54	3.55	17.79	15.78	24.02	11.24	3.97	3.37	Adult	M	Indeterminate	-3.85707	-40.9221	0.016	5.886	Chrom1	Deme5
CHUFPB20921	CE	Ubajara	Aw	CaUmida	FOSuA	995.6	836	22.4	33.5	35.76	12.79	15.24	2.48	2.39	4.48	3.54	15.77	13.89	20.39	8.38	3.72	3.27	Adult	M	Mature	-3.85707	-40.9221	0.064	14.697	Chrom1	Deme5
CHUFPB20827	CE	Ubajara	Aw	CaUmida	FOSuA	995.6	836	22.4	33.5	45.68	20.39	19.99	2.9	2.98	5.65	4.57	19.75	16.72	25.48	10.59	4.44	4.26	Adult	F	Mature	-3.85707	-40.9221	0.07	15.854	Chrom2	Deme5
CHUFPB20939	CE	Ubajara	Aw	CaUmida	FOSuA	995.6	836	22.4	33.5	40.12	14.7	16.73	2.66	3.06	4.12	3.67	15.2	14.08	23.14	9.05	3.65	3.78	Adult	M	Mature	-3.85707	-40.9221	0.03	11.196	Chrom2	Deme5
CHUFPB20820	CE	Ubajara	Aw	CaUmida	FOSuA	995.6	836	22.4	33.5	44.4	20.97	18.68	2.81	3.23	5.76	4.1	18.94	16.54	25.87	11.33	4.4	4.99	Adult	M	Mature	-3.85707	-40.9221	0.057	11.001	Chrom1	Deme5
CHUFPB20821	CE	Ubajara	Aw	CaUmida	FOSuA	995.6	836	22.4	33.5	39.73	16.39	15.21	2.58	2.72	4.26	3.11	11.69	12.8	19.51	7.63	3.73	3.76	Adult	F	Mature	-3.85707	-40.9221	0.046	10.032	Chrom1	Deme5
CHUFPB20822	CE	Ubajara	Aw	CaUmida	FOSuA	995.6	836	22.4	33.5	24.96	9.6	10.91	1.76	1.66	3.76	2.27	9.76	8.56	14.06	6.01	1.95	2.27	Juvenile	M	Immature	-3.85707	-40.9221	0.029	7.321	Chrom1	Deme5
CHUFPB22201	CE	Ubajara	Aw	CaUmida	FOSuA	995.6	836	22.4	33.5	34.32	13.58	15.84	2.23	2.82	5.41	3.49	16.01	13.97	21.67	8.81	3.68	3.33	Subadult	M	Mature	-3.85707	-40.9221	0.009	7.49	Chrom2	Deme5
CHUFPB19925	CE	Ubajara	Aw	CaUmida	FOSuA	995.6	836	22.4	33.5	26.64	11.27	11.63	1.98	2.09	3.48	2.91	10.9	9.84	15.7	6.61	2.34	2.82	Subadult	M	Indeterminate	-3.85707	-40.9221	0.012	6.182	Chrom2	Deme5
CHUFPB20894	CE	Ubajara	Aw	CaUmida	FOSuA	995.6	836	22.4	33.5	42.72	18.2	19.13	2.95	2.86	4.56	3.32	18.44	15.49	25.03	9.98	3.87	4.14	Adult	F	Mature	-3.85707	-40.9221	0.051	12.327	Chrom2	Deme5
CHUFPB20830	CE	Ubajara	Aw	CaUmida	FOSuA	995.6	836	22.4	33.5	42.06	17.58	17.67	2.73	2.85	5.84	3.35	15.47	14.32	22.84	9.24	3.91	3.86	Adult	M	Indeterminate	-3.85707	-40.9221	0.044	20.309	Chrom2	Deme5
UFPB9661	PE	Vconceicao	BSh	Caatinga	SEArA	1079.2	237	22.2	32.8	41.39	15.35	18.03	2.63	3.4	4.46	3.07	16.6	14.4	22.51	9.25	3.59	3.41	Adult	F	Mature	-6.47218	-39.1115	0.063	15.993	Chrom5	Deme4
UFPB9662	PE	Vconceicao	BSh	Caatinga	SEArA	1079.2	237	22.2	32.8	35.97	13.32	15.99	1.47	2.35	4.65	2.71	14.33	13.08	19.84	7.63	3.36	3.22	Adult	F	Mature	-6.47218	-39.1115	0.121	15.331	Chrom3	Deme4
UFPB9666	PE	Vconceicao	BSh	Caatinga	SEArA	1079.2	237	22.2	32.8	35.18	13.68	15.67	1.73	2.75	3.82	2.82	13.81	12.62	18.62	7.31	3.57	2.8	Adult	M	Mature	-6.47218	-39.1115	0.096	12.931	Chrom2	Deme4
UFPB9668	PE	Vconceicao	BSh	Caatinga	SEArA	1079.2	237	22.2	32.8	35.82	14.42	15.16	3.26	3.5	4.48	3.07	14.18	13.16	19.9	8.49	4.16	3.68	Adult	M	Mature	-6.47218	-39.1115	0.076	25.761	Chrom6	Deme4
UFPB9664	PE	Vconceicao	BSh	Caatinga	SEArA	1079.2	237	22.2	32.8	32.49	13.44	14.12	2.77	3.33	4.23	2.99	12.9	10.4	16.65	8.38	3.6	3.31	Subadult	M	Mature	-6.47218	-39.1115	0.274	27.632	Chrom4	Deme4
UFPB9667	PE	Vconceicao	BSh	Caatinga	SEArA	1079.2	237	22.2	32.8	35.27	14.17	15.55	2.13	3.06	4.25	2.66	14.48	12.15	19.22	8.54	3.72	3.21	Subadult	F	Mature	-6.47218	-39.1115	0.098	14.247	Chrom1	Deme4
UFPB9665	PE	Vconceicao	BSh	Caatinga	SEArA	1079.2	237	22.2	32.8	40.89	13.89	16.59	2.25	2.98	4.12	2.34	14.4	14.14	21.95	8.64	3.82	3.07	Adult	F	Mature	-6.47218	-39.1115	0.096	12.931	Chrom6	Deme4
UFPB9663	PE	Vconceicao	BSh	Caatinga	SEArA	1079.2	237	22.2	32.8	32.52	12.4	14.18	1.68	2.02	4.47	1.93	13	11.56	18.04	7.62	3.45	2.74	Subadult	M	Mature	-6.47218	-39.1115	0.085	10.152	Chrom2	Deme4
z259	PE	Vconceicao	BSh	Caatinga	SEArA	1079.2	237	22.2	32.8	35.82	14.42	15.16	3.26	3.5	4.48	3.07	14.18	13.16	19.9	8.49	4.16	3.68	Adult	M	Mature	-6.47218	-39.1115	0.076	25.761	Chrom6	Deme4
z260	PE	Vconceicao	BSh	Caatinga	SEArA	1079.2	237	22.2	32.8	35.81	14.41	15.15	3.25	3.49	4.47	3.06	14.18	13.16	19.9	8.48	4.16	3.67	Adult	M	Mature	-6.47218	-39.1115	0.076	25.761	Chrom6	Deme4
z261	PE	Vconceicao	BSh	Caatinga	SEArA	1079.2	237	22.2	32.8	35.97	13.32	15.99	1.47	2.35	4.65	2.71	14.33	13.08	19.84	7.63	3.36	3.22	Adult	F	Mature	-6.47218	-39.1115	0.121	15.331	Chrom3	Deme4
z262	PE	Vconceicao	BSh	Caatinga	SEArA	1079.2	237	22.2	32.8	40.89	13.89	16.59	2.25	2.98	4.12	2.34	14.4	14.14	21.95	8.64	3.82	3.07	Adult	F	Mature	-6.47218	-39.1115	0.096	12.931	Chrom6	Deme4
z263	PE	Vconceicao	BSh	Caatinga	SEArA	1079.2	237	22.2	32.8	35.27	14.18	15.55	2.13	3.07	4.26	2.66	14.48	12.16	19.22	8.54	3.72	3.22	Subadult	F	Mature	-6.47218	-39.1115	0.098	14.247	Chrom1	Deme4
z264	PE	Vconceicao	BSh	Caatinga	SEArA	1079.2	237	22.2	32.8	35.27	14.17	15.55	2.13	3.06	4.25	2.66	14.48	12.15	19.22	8.54	3.72	3.21	Subadult	F	Mature	-6.47218	-39.1115	0.098	14.247	Chrom1	Deme4
z265	PE	Vconceicao	BSh	Caatinga	SEArA	1079.2	237	22.2	32.8	35.18	13.68	15.67	1.73	2.75	3.82	2.82	13.81	12.62	18.62	7.31	3.57	2.8	Adult	M	Mature	-6.47218	-39.1115	0.096	12.931	Chrom2	Deme4
z266	PE	Vconceicao	BSh	Caatinga	SEArA	1079.2	237	22.2	32.8	32.52	12.4	14.18	1.68	2.02	4.47	1.93	13	11.56	18.04	7.62	3.45	2.74	Subadult	M	Mature	-6.47218	-39.1115	0.085	10.152	Chrom2	Deme4

## Sheet: Notes
1. ArbAr – Arbórea Arbustiva
2. AreIu – Área de Influência Urbana
3. AreT – Área de Transição
4. AreTenSFE – Área de Transição entre Savana e Floresta Estacional
5. Ca – Caatinga
6. FESmdSu – Floresta Estacional Semidecidual Submontana
7. FOSuA – Floresta Ombrófila Submontana/Agropecuária
8. FOVSA – Floresta Ombrófila/Vegetação de Savana e Agropecuária
9. SArb – Savana Arbustiva
10. SEArA – Savana Estépica Arborizada/Agropecuária
11. SEFE – Savana Estépica e Floresta Estacional
12. SEFDA – Savana Estépica/Floresta Decidual/Agropecuária
1. Ca – Caatinga
1. CaUm – Caatinga Úmida (Caatinga com enclaves de floresta úmida)
2. Ce – Cerrado
3. FBM – Florestas de Babaçu do Maranhão
4. FCB – Floresta Costeira da Bahia
5. FIB – Florestas do Interior da Bahia
